# Supplementary material for: Helmet Non-Invasive Ventilation for COVID-19 Patients (Helmet-COVID): study protocol for a multicentre randomised controlled trial
Source: PubMed Central journal article supplement — BMJ Open. 2021 Aug 26;11(8):e052169. doi: 10.1136/bmjopen-2021-052169 (PMC8392742; doi:10.1136/bmjopen-2021-052169), 2021-08-26
Supplement: bmjopen-2021-052169.draft_revisions.pdf [file bmjopen-2021-052169.draft_revisions.pdf]

# BMJ Open

BMJ Open is committed to open peer review. As part of this commitment we make the peer review history of every article we publish publicly available.

When an article is published we post the peer reviewers' comments and the authors' responses online. We also post the versions of the paper that were used during peer review. These are the versions that the peer review comments apply to.

The versions of the paper that follow are the versions that were submitted during the peer review process. They are not the versions of record or the final published versions. They should not be cited or distributed as the published version of this manuscript.

BMJ Open is an open access journal and the full, final, typeset and author-corrected version of record of the manuscript is available on our site with no access controls, subscription charges or pay-per-view fees (<http://bmjopen.bmj.com>).

If you have any questions on BMJ Open's open peer review process please email [info.bmjopen@bmj.com](mailto:info.bmjopen@bmj.com)

# BMJ Open

## Helmet noninvasive ventilation for COVID-19 patients "Helmet-COVID": study protocol for a multicenter randomized controlled trial

|                               |                                                                                                                                                                                                                                                                                                                                                                                                                                                                                                                                                                                                                                                                                                                                                                                                                                                                                                                                                                                                                                                                                                                                                                                                                                                                                                                                                                                                                                                                                                                                                                                                                                                                                                                                                                                                                                                                                                                                                                                                                                                                                                                                                                                                                                                                                                                                                 |
|-------------------------------|-------------------------------------------------------------------------------------------------------------------------------------------------------------------------------------------------------------------------------------------------------------------------------------------------------------------------------------------------------------------------------------------------------------------------------------------------------------------------------------------------------------------------------------------------------------------------------------------------------------------------------------------------------------------------------------------------------------------------------------------------------------------------------------------------------------------------------------------------------------------------------------------------------------------------------------------------------------------------------------------------------------------------------------------------------------------------------------------------------------------------------------------------------------------------------------------------------------------------------------------------------------------------------------------------------------------------------------------------------------------------------------------------------------------------------------------------------------------------------------------------------------------------------------------------------------------------------------------------------------------------------------------------------------------------------------------------------------------------------------------------------------------------------------------------------------------------------------------------------------------------------------------------------------------------------------------------------------------------------------------------------------------------------------------------------------------------------------------------------------------------------------------------------------------------------------------------------------------------------------------------------------------------------------------------------------------------------------------------|
| Journal:                      | <i>BMJ Open</i>                                                                                                                                                                                                                                                                                                                                                                                                                                                                                                                                                                                                                                                                                                                                                                                                                                                                                                                                                                                                                                                                                                                                                                                                                                                                                                                                                                                                                                                                                                                                                                                                                                                                                                                                                                                                                                                                                                                                                                                                                                                                                                                                                                                                                                                                                                                                 |
| Manuscript ID                 | bmjopen-2021-052169                                                                                                                                                                                                                                                                                                                                                                                                                                                                                                                                                                                                                                                                                                                                                                                                                                                                                                                                                                                                                                                                                                                                                                                                                                                                                                                                                                                                                                                                                                                                                                                                                                                                                                                                                                                                                                                                                                                                                                                                                                                                                                                                                                                                                                                                                                                             |
| Article Type:                 | Protocol                                                                                                                                                                                                                                                                                                                                                                                                                                                                                                                                                                                                                                                                                                                                                                                                                                                                                                                                                                                                                                                                                                                                                                                                                                                                                                                                                                                                                                                                                                                                                                                                                                                                                                                                                                                                                                                                                                                                                                                                                                                                                                                                                                                                                                                                                                                                        |
| Date Submitted by the Author: | 07-Apr-2021                                                                                                                                                                                                                                                                                                                                                                                                                                                                                                                                                                                                                                                                                                                                                                                                                                                                                                                                                                                                                                                                                                                                                                                                                                                                                                                                                                                                                                                                                                                                                                                                                                                                                                                                                                                                                                                                                                                                                                                                                                                                                                                                                                                                                                                                                                                                     |
| Complete List of Authors:     | <p>Arabi, Yaseen; Ministry of National Guard Health Affairs, Intensive Care Department; King Saud bin Abdulaziz University for Health Sciences Tlayjeh, Haytham; Ministry of National Guard Health Affairs, Intensive Care Department; King Saud bin Abdulaziz University for Health Sciences Aldekhyl, Sara; King Saud bin Abdulaziz University for Health Sciences; Ministry of National Guard Health Affairs</p> <p>Al-Dorzi, Hasan; Ministry of National Guard Health Affairs, Intensive Care Department; King Abdullah International Medical Research Center Abdukahil, Sheryl Ann; Ministry of National Guard Health Affairs, Intensive Care Department; King Saud bin Abdulaziz University for Health Sciences</p> <p>Al Harbi, Mohammad Khulaif ; Ministry of National Guard Health Affairs, Department of Anesthesia; King Abdullah International Medical Research Center</p> <p>Al Haji, Husain; Ministry of National Guard Health Affairs, Respiratory Services Department; King Saud bin Abdulaziz University for Health Sciences</p> <p>Al Mutairi, Mohammed ; Ministry of National Guard Health Affairs, Respiratory Services Department; King Saud bin Abdulaziz University for Health Sciences</p> <p>Al Zumai, Omar ; Ministry of National Guard Health Affairs, Respiratory Services Department; King Saud bin Abdulaziz University for Health Sciences</p> <p>Al Qasim, Eman; King Abdullah International Medical Research Center, Research Office ; King Saud bin Abdulaziz University for Health Sciences Al Wehaibi , Wedyan; Ministry of National Guard Health Affairs, Intensive Care Department</p> <p>Al Qahtani, Saad; Ministry of National Guard Health Affairs, Intensive Care Department; King Saud bin Abdulaziz University for Health Sciences Al-Hameed, Fahad ; Ministry of National Guard Health Affairs, Intensive Care Department; King Saud bin Abdulaziz University for Health Sciences Chalabi, Jamal; King Saud bin Abdulaziz University for Health Sciences, Intensive Care Department</p> <p>Alshahrani, Mohammed; Imam Abdulrahman Bin Faisal University King Fahd Hospital of the University, Department of Emergency and Critical Care</p> <p>Alharthy, Abdulrahman; King Saud Medical City, Intensive Care Department</p> <p>Mady, Ahmed; King Saud Medical City, Intensive Care Department;</p> |

|           |                                                                                                                                                                                                                                                                                                                                                                                                                                                                                                                                                                                                                                                                                                                                                                                                                                                                                                                                                                                                                                                                                                                                                                                                                                                                                                                                                                                                                                                                                                                                                                                                                                                                                                                                                                                                                                                                                                                                                                                                                                                                                                           |
|-----------|-----------------------------------------------------------------------------------------------------------------------------------------------------------------------------------------------------------------------------------------------------------------------------------------------------------------------------------------------------------------------------------------------------------------------------------------------------------------------------------------------------------------------------------------------------------------------------------------------------------------------------------------------------------------------------------------------------------------------------------------------------------------------------------------------------------------------------------------------------------------------------------------------------------------------------------------------------------------------------------------------------------------------------------------------------------------------------------------------------------------------------------------------------------------------------------------------------------------------------------------------------------------------------------------------------------------------------------------------------------------------------------------------------------------------------------------------------------------------------------------------------------------------------------------------------------------------------------------------------------------------------------------------------------------------------------------------------------------------------------------------------------------------------------------------------------------------------------------------------------------------------------------------------------------------------------------------------------------------------------------------------------------------------------------------------------------------------------------------------------|
|           | <p>Tanta University, College of Medicine<br/>         Bin Eshaq, Abdulhadi; King Khalid Hospital Najran<br/>         A. Al bshabshe, Ali; King Khalid University<br/>         Al Aseri , Zohair; King Saud University Medical City, Emergency and Intensive Care Department<br/>         Al Duhailib, Zainab; King Faisal Specialist Hospital and Research Center, Adult Critical Care Department<br/>         Kharaba, Ayman; King Fahad Hospital Madinah, Pulmonary &amp; Critical Care Departments<br/>         Alqahtani, Rakan ; King Khalid University Hospital<br/>         Al Ghamdi, Adnan; Prince Sultan Military Medical City, Department of Intensive Care Services<br/>         Altalag, Ali; Prince Sultan Military Medical City, Department of Intensive Care Services<br/>         Alghamdi, Khalid ; King Faisal Specialist Hospital and Research Centre - Jeddah, Intensive Care Department<br/>         Almaani, Mohammed; King Fahad Medical City, Department of Pulmonary &amp; Critical Care Medicine<br/>         Algethamy, Haifa; King Abdulaziz University Hospital<br/>         Al Aqeily, Ahmad ; Ministry of National Guard Health Affairs, Respiratory Services Department; King Saud bin Abdulaziz University for Health Sciences<br/>         Al Baseet, Faisal ; Ministry of National Guard Health Affairs, Respiratory Services Department; King Saud bin Abdulaziz University for Health Sciences<br/>         Al Samannoudi, Hashem ; Ministry of National Guard Health Affairs, Respiratory Services Department; King Saud bin Abdulaziz University for Health Sciences<br/>         Al Obaidi, Mohammed ; Ministry of National Guard Health Affairs, Respiratory Services Department; King Saud bin Abdulaziz University for Health Sciences<br/>         Ismaiel, Yassin; Ministry of National Guard Health Affairs, Respiratory Services Department; King Saud bin Abdulaziz University for Health Sciences, Respiratory therapy<br/>         Al-Fares, Abdulrahman A; Al-Amiri Hospital , Department of Anesthesia, Critical Care Medicine and Pain Medicine</p> |
| Keywords: | Adult intensive & critical care < INTENSIVE & CRITICAL CARE, RESPIRATORY MEDICINE (see Thoracic Medicine), COVID-19                                                                                                                                                                                                                                                                                                                                                                                                                                                                                                                                                                                                                                                                                                                                                                                                                                                                                                                                                                                                                                                                                                                                                                                                                                                                                                                                                                                                                                                                                                                                                                                                                                                                                                                                                                                                                                                                                                                                                                                       |
|           |                                                                                                                                                                                                                                                                                                                                                                                                                                                                                                                                                                                                                                                                                                                                                                                                                                                                                                                                                                                                                                                                                                                                                                                                                                                                                                                                                                                                                                                                                                                                                                                                                                                                                                                                                                                                                                                                                                                                                                                                                                                                                                           |

SCHOLARONE™  
 Manuscripts

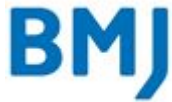

I, the Submitting Author has the right to grant and does grant on behalf of all authors of the Work (as defined in the below author licence), an exclusive licence and/or a non-exclusive licence for contributions from authors who are: i) UK Crown employees; ii) where BMJ has agreed a CC-BY licence shall apply, and/or iii) in accordance with the terms applicable for US Federal Government officers or employees acting as part of their official duties; on a worldwide, perpetual, irrevocable, royalty-free basis to BMJ Publishing Group Ltd ("BMJ") its licensees and where the relevant Journal is co-owned by BMJ to the co-owners of the Journal, to publish the Work in this journal and any other BMJ products and to exploit all rights, as set out in our [licence](#).

The Submitting Author accepts and understands that any supply made under these terms is made by BMJ to the Submitting Author unless you are acting as an employee on behalf of your employer or a postgraduate student of an affiliated institution which is paying any applicable article publishing charge ("APC") for Open Access articles. Where the Submitting Author wishes to make the Work available on an Open Access basis (and intends to pay the relevant APC), the terms of reuse of such Open Access shall be governed by a Creative Commons licence – details of these licences and which [Creative Commons](#) licence will apply to this Work are set out in our licence referred to above.

Other than as permitted in any relevant BMJ Author's Self Archiving Policies, I confirm this Work has not been accepted for publication elsewhere, is not being considered for publication elsewhere and does not duplicate material already published. I confirm all authors consent to publication of this Work and authorise the granting of this licence.

1  
2  
3  
4 **Helmet noninvasive ventilation for COVID-19 patients “Helmet-COVID”: study protocol**  
5 **for a multicenter randomized controlled trial**  
6  
7

8 **Yaseen Arabi, MD FCCP, FCCM, ATSF [YA]**

9 Intensive Care Department, Ministry of National Guard Health Affairs, Riyadh, Saudi Arabia  
10 King Abdullah International Medical Research Center  
11 King Saud Bin Abdulaziz University for Health Sciences, Riyadh, Saudi Arabia  
12 [yaseenarabi@yahoo.com](mailto:yaseenarabi@yahoo.com)  
13

14 **Haytham Tlayjeh, MD [HT]**

15 Intensive Care Department, Ministry of National Guard Health Affairs, Riyadh, Saudi Arabia  
16 King Abdullah International Medical Research Center  
17 King Saud Bin Abdulaziz University for Health Sciences, Riyadh, Saudi Arabia  
18 [tlayjehh@ngha.med.sa](mailto:tlayjehh@ngha.med.sa)  
19

20 **Sara Aldekhyl, MBBS [SD]**

21 College of Medicine, King Saud Bin Abdulaziz University for Health Sciences, Riyadh, Saudi  
22 Arabia  
23 King Abdullah International Medical Research Center  
24 Ministry of National Guard Health Affairs, Riyadh, Saudi Arabia  
25 [DakheelS@NGHA.MED.SA](mailto:DakheelS@NGHA.MED.SA)  
26  
27

28 **Hasan Al-Dorzi, MD [HD]**

29 Intensive Care Department, Ministry of National Guard Health Affairs, Riyadh, Saudi Arabia  
30 King Abdullah International Medical Research Center  
31 King Saud Bin Abdulaziz University for Health Sciences, Riyadh, Saudi Arabia  
32 [aldorzih@yahoo.com](mailto:aldorzih@yahoo.com)  
33

34 **Sheryl Ann Abdukahil, RN [SA]**

35 Intensive Care Department, Ministry of National Guard Health Affairs, Riyadh, Saudi Arabia  
36 King Abdullah International Medical Research Center  
37 King Saud Bin Abdulaziz University for Health Sciences, Riyadh, Saudi Arabia  
38 [abdukahil.sheryl@gmail.com](mailto:abdukahil.sheryl@gmail.com)  
39

40 **Mohammad Khulaif Al Harbi, MD, FRCPC [MH]**

41 Department of Anesthesia, Ministry of National Guard Health Affairs, Riyadh, Saudi Arabia  
42 King Abdullah International Medical Research Center  
43 College of Medicine, King Saud Bin Abdulaziz University for Health Sciences, Riyadh, Saudi  
44 Arabia  
45 [HarbiMK@NGHA.MED.SA](mailto:HarbiMK@NGHA.MED.SA)  
46  
47

48 **Husain Al Haji, RRT [HH]**

49 Respiratory Services Department, Ministry of National Guard Health Affairs, Riyadh, Saudi  
50 Arabia  
51 King Abdullah International Medical Research Center  
52 King Saud Bin Abdulaziz University for Health Sciences, Riyadh, Saudi Arabia  
53 [HajiH@NGHA.MED.SA](mailto:HajiH@NGHA.MED.SA)  
54  
55  
56  
57  
58  
59  
60

**Mohammed Al Mutairi, RRT [MM]**

Respiratory Services Department, Ministry of National Guard Health Affairs, Riyadh, Saudi Arabia

King Abdullah International Medical Research Center

King Saud Bin Abdulaziz University for Health Sciences, Riyadh, Saudi Arabia

[MutairyMM@NGHA.MED.SA](mailto:MutairyMM@NGHA.MED.SA)

**Omar Al Zumai, RRT [OZ]**

Respiratory Services Department, Ministry of National Guard Health Affairs, Riyadh, Saudi Arabia

King Abdullah International Medical Research Center

King Saud Bin Abdulaziz University for Health Sciences, Riyadh, Saudi Arabia

[ZumaiO@NGHA.MED.SA](mailto:ZumaiO@NGHA.MED.SA)

**Eman Al Qasim, RN, MSN [EQ]**

Research Office, King Abdullah International Medical Research Center

King Saud Bin Abdulaziz University for Health Sciences, Riyadh, Saudi Arabia

Ministry of National Guard Health Affairs, Riyadh, Saudi Arabia

[Eman77al-qasim@hotmail.com](mailto:Eman77al-qasim@hotmail.com)

**Wedyan Al Wehaibi [WW]**

Intensive Care Department, Ministry of National Guard Health Affairs, Riyadh, Saudi Arabia

King Abdullah International Medical Research Center

King Saud Bin Abdulaziz University for Health Sciences, Riyadh, Saudi Arabia

[wedyan.mohammed@outlook.com](mailto:wedyan.mohammed@outlook.com)

**Saad Al Qahtani, MD, MMED, MAHA, FRCPC [SQ]**

Intensive Care Department, Ministry of National Guard Health Affairs, Riyadh, Saudi Arabia

King Abdullah International Medical Research Center

King Saud Bin Abdulaziz University for Health Sciences, Riyadh, Saudi Arabia

[mcmasterer@hotmail.com](mailto:mcmasterer@hotmail.com)

**Fahad Al-Hameed, MD, FRCPC [FH]**

Intensive Care Department, Ministry of National Guard Health Affairs, Jeddah, Saudi Arabia

King Abdullah International Medical Research Center

King Saud Bin Abdulaziz University for Health Sciences, Jeddah, Saudi Arabia

[HameedF@ngha.med.sa](mailto:HameedF@ngha.med.sa)

**Jamal Chalabi, MD [JC]**

Intensive Care Department, Ministry of National Guard Health Affairs, Al Ahsa, Saudi Arabia

King Abdullah International Medical Research Center

King Saud Bin Abdulaziz University for Health Sciences, Al Ahsa, Saudi Arabia

[ChalabiJA@NGHA.MED.SA](mailto:ChalabiJA@NGHA.MED.SA)

**Mohammed Alshahrani, MBBS , SSC-EM , ArEM, FCCM [MS]**

Department of Emergency and Critical Care

King Fahad Hospital of the University

University of Dammam

Al Khobar, Kingdom of Saudi Arabia

[msshahrani@uod.edu.sa](mailto:msshahrani@uod.edu.sa)

**Abdulrhman Alharthy, MD [AH]**

Intensive Care Department  
King Saud Medical City  
Riyadh, Saudi Arabia  
[a\\_almshal@hotmail.com](mailto:a_almshal@hotmail.com)

**Ahmed Mady, MBBCH, MSc, MD,S-FCCM,FCCP [AM]**

Intensive Care Department  
King Saud Medical City  
Riyadh, Saudi Arabia  
College of Medicine  
Tanta University, Egypt  
[afmady@hotmail.com](mailto:afmady@hotmail.com)

**Abdulhadi Bin Eshaq, MD [AE]**

Intensive Care Department  
King Khalid Hospital, Najran  
[drbineshaq@gmail.com](mailto:drbineshaq@gmail.com)

**Ali Al Bshabshe, MD, SSCIM, JBIM, ArBIM, MRCP(UK),EDIC,CNSC [AB]**

Department of Critical Care Medicine  
King Khalid University, Aseer Central Hospital  
Abha, Kingdom of Saudi Arabia  
[albshabshe@yahoo.com](mailto:albshabshe@yahoo.com)

**Zohair Al Aseri, MD, FCEM, FRCPC [ZA]**

Emergency and Intensive Care Departments  
College of Medicine  
King Saud University  
Riyadh, Saudi Arabia  
[zohairalaseri@yahoo.com](mailto:zohairalaseri@yahoo.com)

**Zainab Al Duhailib, MBBS, EDIC, MSc [ZD]**

Adult Critical Care Department  
King Faisal Specialist Hospital & Research Center  
Riyadh, Saudi Arabia  
[zalduhailib65@kfshrc.edu.sa](mailto:zalduhailib65@kfshrc.edu.sa)

**Ayman Kharaba MD, ABIM,FRCPC [AK]**

Pulmonary & Critical Care Departments, King Fahad Hospital Madinah  
Critical Care Units- Madinah Region, Ministry of Health  
[a7yman@hotmail.com](mailto:a7yman@hotmail.com)

**Rakan Alqahtani, MD [RQ]**

Department of Critical Care, King Khalid University Hospital  
King Saud University Medical City, Riyadh, Saudi Arabia.  
[arakan@KSU.EDU.SA](mailto:arakan@KSU.EDU.SA)

**Adnan Al Ghamdi, MD [AG]**

Department of Intensive Care Services

1  
2  
3 Prince Sultan Military Medical City  
4 Riyadh, Saudi Arabia  
5 [sbb1971@hotmail.com](mailto:sbb1971@hotmail.com)  
6

7 **Ali Altalag, MD [AT]**  
8 Department of Intensive Care Services  
9 Prince Sultan Military Medical City  
10 Riyadh, Saudi Arabia  
11 [drtalag@yahoo.com](mailto:drtalag@yahoo.com)  
12

13 **Khalid Alghamdi, MD [KG]**  
14 Intensive Care Department  
15 King Faisal Specialist Hospital & Research Center  
16 Jeddah, Saudi Arabia  
17 [kai-ghamdi@kfshrc.edu.sa](mailto:kai-ghamdi@kfshrc.edu.sa)  
18

19 **Mohammed Almaani, MD,SSC- Em, ArBEM, UWO FCCM [MA]**  
20 Department of Pulmonary & Critical Care Medicine  
21 King Fahad Medical City  
22 King Saud Bin Abdulaziz University for Health Sciences  
23 Riyadh, Saudi Arabia  
24 [malmaani@kfmc.med.sa](mailto:malmaani@kfmc.med.sa)  
25

26 **Haifa Algethamy, MD [HG]**  
27 Department of Anesthesia  
28 King Abdulaziz University Hospital  
29 Jeddah, Saudi Arabia  
30 [halgethamy2020@gmail.com](mailto:halgethamy2020@gmail.com)  
31

32 **Ahmad Al Aqeily, RRT [AA]**  
33 Respiratory Services Department, Ministry of National Guard Health Affairs, Riyadh, Saudi  
34 Arabia  
35 King Abdullah International Medical Research Center  
36 King Saud Bin Abdulaziz University for Health Sciences, Riyadh, Saudi Arabia  
37 [AqeilA@NGHA.MED.SA](mailto:AqeilA@NGHA.MED.SA)  
38

39 **Faisal Al Baseet, RRT [FB]**  
40 Respiratory Services Department, Ministry of National Guard Health Affairs, Riyadh, Saudi  
41 Arabia  
42 King Abdullah International Medical Research Center  
43 King Saud Bin Abdulaziz University for Health Sciences, Riyadh, Saudi Arabia  
44 [albaseetfa@NGHA.MED.SA](mailto:albaseetfa@NGHA.MED.SA)  
45

46 **Hashem Al Samannoudi, RRT [HS]**  
47 Respiratory Services Department, Ministry of National Guard Health Affairs, Riyadh, Saudi  
48 Arabia  
49 King Abdullah International Medical Research Center  
50 King Saud Bin Abdulaziz University for Health Sciences, Riyadh, Saudi Arabia  
51 [SamannoudiHa@NGHA.MED.SA](mailto:SamannoudiHa@NGHA.MED.SA)  
52



**Mohammed Al Obaidi, RRT [MO]**

Respiratory Services Department, Ministry of National Guard Health Affairs, Riyadh, Saudi Arabia

King Abdullah International Medical Research Center

King Saud Bin Abdulaziz University for Health Sciences, Riyadh, Saudi Arabia

[alobaidimo@NGHA.MED.SA](mailto:alobaidimo@NGHA.MED.SA)

**Yassin Ismaeil, RRT [YI]**

Respiratory Services Department, Ministry of National Guard Health Affairs, Riyadh, Saudi Arabia

King Abdullah International Medical Research Center

King Saud Bin Abdulaziz University for Health Sciences, Riyadh, Saudi Arabia

[IsmaeiY@NGHA.MED.SA](mailto:IsmaeiY@NGHA.MED.SA)

**Abdulrahman A Al-Fares, MBChB, MRCP, ABIM, FRCPC [AF]**

Department of Anesthesia, Critical Care Medicine and Pain Medicine

Al-Amiri Hospital, Ministry of Health, Kuwait

[abdulrahman.alfares@gmail.com](mailto:abdulrahman.alfares@gmail.com)

**Corresponding author****Yaseen Arabi, MD FCCP, FCCM, ATSF [YA]**

(ORCID: 0000-0001-5735-6241)

Intensive Care Department, Ministry of National Guard Health Affairs, Riyadh, Saudi Arabia

King Abdullah International Medical Research Center

King Saud Bin Abdulaziz University for Health Sciences, Riyadh, Saudi Arabia

[yaseenarabi@yahoo.com](mailto:yaseenarabi@yahoo.com)

## Abstract

### Introduction

Noninvasive ventilation delivered by helmet is has been used for respiratory support of patients with acute hypoxemic respiratory failure due to COVID-19 pneumonia. The aim of this study is to compare helmet noninvasive ventilation with usual therapy versus usual therapy alone to reduce the mortality.

### Methods and analysis

This is a multicenter, pragmatic, parallel, randomized controlled trial that will compare helmet noninvasive ventilation with usual care to usual care alone in 1:1 ratio. A total of 320 patients will be enrolled in this study. The primary outcome is 28-day mortality. The primary outcome will be compared between the two study groups in the intention to-treat and per-protocol cohorts. An interim analysis will be conducted for both safety and effectiveness.

### Ethics and dissemination

Approval will be obtained from the research ethics board of each participating institution. Our findings will be published in peer-review journals and presented at relevant stake holders' conferences and meetings.

**Trial registration number** NCT04477668

## Article Summary

### Strengths and limitations of this study

- This trial compares helmet NIV to usual care for respiratory support of patients with acute hypoxemic respiratory failure due to COVID-19 pneumonia.
- The trial is a multi-center, pragmatic, parallel randomized controlled trial.
- The main limitations include the unblinded design due to the nature of the intervention.

For peer review only

## Introduction

The novel severe acute respiratory syndrome coronavirus 2 (SARS-CoV-2) has led to a pandemic resulting in over 131 million cases and approximately 2.9 million fatalities as of April 5, 2021.<sup>1</sup> The resulting Coronavirus Disease 2019 (COVID-19) leads to severe pneumonia and acute respiratory distress syndrome (ARDS) among other organ injury.<sup>2</sup> ARDS may occur in up to 5% of infected patients.<sup>3-5</sup> Invasive mechanical ventilation was used widely because of concerns about noninvasive ventilation safety and efficacy early in the pandemic. However, noninvasive ventilation (NIV) use increased with time, including mask NIV and helmet NIV. NIV has been shown to be physiologic benefits in patients with acute hypoxemic respiratory failure (AHRF) secondary to pulmonary edema, atelectasis, or pneumonia.<sup>6</sup> It has been shown to improve arterial oxygenation by increasing functional residual capacity, shifting the tidal volume to a more compliant part of the pressure-volume curve, thus reducing both the work of breathing and the risk of tidal opening and closure of the airways.<sup>7</sup> NIV is commonly provided through nasal or oro-nasal interfaces. The resulting aerosol generation may increase the risk of transmission of pathogens to healthcare providers, raising concerns about the use of NIV in patients with viral pneumonia.<sup>8</sup> Helmet NIV has been used for AHRF including patients with COVID-19 pneumonia. The helmet surrounds the patient's entire head to supply oxygen and is sealed with a soft, airtight collar that wraps around the neck. Due to this design, it has advantages over the nasal and oro-nasal interfaces. These include less air leaks, no skin or nasal bridge injuries, no eye irritation, fitting for different facial contours,<sup>9</sup> and hypothetically less dissemination of aerosols in the environment.

Evaluation of helmet NIV as a respiratory support modality started more than two decades ago.<sup>10</sup> Helmet NIV has been investigated as a treatment for different forms of AHRF in adults in various settings, such as pre-hospital ambulance, emergency department and ICU.<sup>7 11-15</sup>

However, clinical studies are relatively scarce and small in size. Their primary outcomes were

1  
2  
3 improvement in oxygenation and requirement for intubation. A systematic review concluded that  
4 there was insufficient scientific evidence to recommend helmet NIV in AHRF due to the limited  
5 number of trials available.<sup>6</sup>  
6  
7  
8

9  
10 However, the evidence on helmet NIV for AHRF is growing. A systematic review of randomized  
11 controlled trials (RCTs) and observational studies published before June 2016 found 11 studies  
12 involving 621 patients.<sup>16</sup> Compared with controls, the use of the helmet was associated with  
13 lower hospital mortality (odds ratio, 0.43; 95% CI, 0.26-0.69), intubation rate (odds ratio, 0.32;  
14 95% CI, 0.21-0.47), and complications (odds ratio, 0.6; 95% CI, 0.4-0.92).<sup>16</sup> Moreover, there  
15 was no significant difference in gas exchange and ICU stay.<sup>16</sup> A meta-analysis of four RCTs  
16 (377 patients) showed that helmet NIV significantly increased the ratio of arterial oxygen partial  
17 pressure to fraction (percent) of inspired oxygen ( $\text{PaO}_2/\text{FiO}_2$ ) (+73.4; 95% CI, 43.9-102.9) and  
18 decreased arterial carbon dioxide levels (-1.92; 95% CI, -3.21 to -0.63), intubation rate (relative  
19 risk, 0.21; 95% CI, 0.11-0.40) and in-hospital mortality rate (relative risk, 0.22; 95% CI, 0.09-  
20 0.50) compared to standard oxygen therapy.<sup>17</sup> In a more recent systematic review and network  
21 meta-analysis that included 25 studies (published up to April 2020) and 3804 patients with  
22 AHRF, treatment with helmet NIV (risk ratio, 0.40; 95% credible interval (CrI), 0.24-0.63;  
23 absolute risk difference, -0.19; 95% CrI, -0.37 to -0.09; low certainty) and face mask NIV (risk  
24 ratio, 0.83; 95% CrI, 0.68-0.99; absolute risk difference, -0.06; 95% CrI, -0.15 to -0.01);  
25 moderate certainty) were associated with a lower risk of mortality compared with standard  
26 oxygen.<sup>18</sup> Moreover, helmet NIV (risk ratio, 0.26; 95% CrI, 0.14-0.46; absolute risk difference,  
27 -0.32; 95% CrI, -0.60 to -0.16; low certainty), face mask NIV (risk ratio, 0.76; 95% CrI, 0.62-  
28 0.90; absolute risk difference, -0.12; 95% CrI, -0.25 to -0.05); moderate certainty) and high-  
29 flow nasal oxygen (RR, 0.76 [95% CrI, 0.55-0.99]; absolute risk difference, -0.11; 95% CrI,  
30 -0.27 to -0.01; moderate certainty) were associated with lower risk of endotracheal intubation  
31 compared with standard oxygen.<sup>18</sup>  
32  
33  
34  
35  
36  
37  
38  
39  
40  
41  
42  
43  
44  
45  
46  
47  
48  
49  
50  
51  
52  
53  
54  
55  
56  
57  
58  
59  
60

1  
2  
3 Data on helmet NIV in AHRF related to COVID-19 are emerging. A recent RCT conducted in  
4 patients admitted to 4 Italian ICUs with COVID-19 and moderate to severe AHRF found that  
5 treatment with helmet NIV did not result in significantly fewer days of respiratory support at 28  
6 days from randomization (primary outcome) as compared with high-flow nasal oxygen alone  
7 (mean difference 2 days, 95% CI, -2 to 6,  $p=0.26$ ).<sup>19</sup> Nevertheless, the intubation rate was  
8 significantly lower in the helmet group than in the high-flow nasal oxygen group (30% vs 51%;  
9  $p=0.03$ ).<sup>19</sup> Additionally, the median number of days free of invasive mechanical ventilation within  
10 28 days was significantly higher in the helmet group than in the high-flow nasal oxygen group  
11 (28 versus 25 days; mean difference, 3 days; 95% CI, 0-7;  $P = 0.04$ ).<sup>19</sup> The hospital mortality  
12 was 24% in the helmet group and 25% in the high-flow nasal oxygen group.<sup>19</sup>

13  
14  
15  
16  
17  
18  
19  
20  
21  
22  
23  
24  
25 As the efficacy of helmet NIV to improve outcomes in severe AHRF due to COVID-19  
26 pneumonia has not been clearly established, the aim of this study is to compare helmet NIV with  
27 usual care versus usual care alone to reduce mortality. We hypothesize that helmet NIV will  
28 reduce 28-day all-cause mortality in patients with suspected or confirmed severe COVID-19  
29 pneumonia and AHRF.  
30  
31  
32  
33  
34

## 35 36 **Methods and analysis**

### 37 38 **Trial design**

39  
40  
41 This is an investigator-initiated, pragmatic parallel RCT that will compare helmet NIV with usual  
42 care to usual care alone in 1:1 ratio in patients with suspected or confirmed COVID-19  
43 pneumonia and AHRF. The trial is sponsored by King Abdullah International Medical Research  
44 Center, Riyadh, Saudi Arabia, has been registered with ClinicalTrials.gov (NCT04477668) and  
45 will be conducted across multiple centers in Saudi Arabia. Training and in-service education on  
46 helmet NIV use as well as on protocol implementation will be provided to all participating  
47 centers. The competency of the bedside respiratory therapists will be checked by experienced  
48 respiratory care supervisors and intensivists.  
49  
50  
51  
52  
53  
54  
55  
56  
57

## Sample size

In a large observation study of patients with AHRF and ARDS, hospital mortality was 34.9% (95% CI, 31.4-38.5%) for patients with mild ARDS, 40.3% (95% CI, 37.4%-43.3%) for those with moderate ARDS, and 46.1% (95% CI, 41.9%-50.4%) for those with severe ARDS.<sup>20</sup> Assuming a mortality rate of 40% in patients with COVID-19 pneumonia and moderate to severe ARDS treated with usual care, we calculated that enrollment of 304 patients (152 in each group) would provide the study with 80% power to show an absolute difference of 15% in the primary outcome between the usual care group and helmet NIV group at a two-sided alpha level of 0.05.<sup>21</sup> To account for 5% loss to follow-up, the total number of patients needed in the trial is 320 patients.

## Participant eligibility

The trial will enroll ICU patients with suspected or confirmed COVID-19 pneumonia who have AHRF. Detailed inclusion and exclusion criteria can be found in **Table 1**.

## Informed consent

Informed consent will be obtained from the potential trial participants or their surrogate decision maker. A hybrid model of consent will be used where a priori consent is obtained if possible, otherwise delayed consent model will be obtained as per local approval.

## Trial interventions

### *Helmet group*

A helmet (Subsalve, USA or its equivalent), which is made of transparent latex-free polyvinyl chloride, will be applied to patients randomized to the intervention group as per the manufacturer instructions. It will be immediately connected to an ICU ventilator in pressure support (PS) mode with positive end-expiratory pressure (PEEP) using a conventional respiratory circuit joining two port sites to allow inspiratory and expiratory flow. The starting

1  
2  
3 settings is PS 8-10 cm H<sub>2</sub>O, PEEP 10 cm H<sub>2</sub>O with FiO<sub>2</sub> 100%, targeting flow rate ≥50 L/min  
4 with an Inspiratory rise time 50 msec and end flow/cycling off 50% of maximal inspiratory flow.  
5 PEEP can be increased by 2 cm every 3 minutes to achieve SpO<sub>2</sub>≥90% at FIO<sub>2</sub>≤ 60%, and PS  
6 can be increased by 2 cm every 3 minutes to achieve respiratory rate ≤ 25/min and  
7 disappearance of accessory muscle activity. The maximal allowed PS + PEEP is 30 cm H<sub>2</sub>O.  
8  
9  
10  
11  
12  
13  
14  
15  
16  
17  
18  
19  
20  
21  
22  
23  
24  
25  
26  
27  
28  
29  
30  
31  
32  
33  
34  
35  
36  
37  
38  
39  
40  
41  
42  
43  
44  
45  
46  
47  
48  
49  
50  
51  
52  
53  
54  
55  
56  
57  
58  
59  
60

Helmet should be continuously applied for at least 48 hours.<sup>19</sup> More details of helmet application, set up and weaning can be found in the **Supplementary File**. Some patients may not tolerate the helmet. The physician or the respiratory therapist will explain the procedure to the patient. In case the patient continues to refuse the helmet, this will be documented in case report form. Dexmedetomidine may be used to improve compliance with the helmet. However, other intravenous sedatives such as benzodiazepines or intravenous narcotics should generally not be used. Patient then can be managed according to the usual care. Detailed data about tolerance will be collected.

### **Control group**

In the control group, patients will receive usual care according to the clinical practices of each site. This may include oxygen provided high flow nasal cannula or NIV provided by nasal mask, face mask or total mask.

### **Decision to Intubate**

The decision to intubate enrolled patients will be at the discretion of the treating team. There will be no involvement from the research team in this decision. However, the protocol provides guidance on assessing patients for the need of endotracheal intubation throughout NIV treatment (helmet NIV or usual care) according to the following:



1  
2  
3 Assess the patient within 4 hours and at frequent intervals throughout NIV treatment for  
4  
5

- 6 • Neurologic deterioration (*not attributed to sedation*)  
7
- 8 • Persistent or worsening respiratory failure of NIV:  
9
  - 10 • oxygen saturation <88%
  - 11
  - 12 • respiratory rate >36/min
  - 13
  - 14
  - 15 •  $PO_2/FiO_2$  ratio <100
  - 16
  - 17
  - 18 • a persistent requirement of  $FiO_2 \geq 70\%$   
19
- 20
- 21 • Intolerance of face mask or helmet
- 22
- 23
- 24 • Airway bleeding
- 25
- 26
- 27 • Copious respiratory secretions
- 28
- 29 • Respiratory acidosis with pH <7.25
- 30
- 31
- 32 • Hemodynamic instability
- 33
- 34 • Significant radiologic worsening
- 35
- 36
- 37
- 38

### 39 **Co-Interventions**

40  
41 Patients who required endotracheal intubation will be managed by the primary team with lung  
42 protective strategy with tidal volumes of 6 mL/kg of ideal body weight and titration of PEEP to  
43 achieve oxygen saturation of 88% to 95% at the lowest possible  $FiO_2$ . Daily interruption of  
44 sedation, awakening and breathing trials, and early mobilization will be performed per the ICU  
45 standard care.<sup>22</sup> Management of COVID-19 will be as per local protocols; physicians are  
46 advised to follow the related clinical practice guidelines set by the Saudi Critical Care Society,<sup>23</sup>  
47 the Surviving Sepsis Campaign,<sup>24 25</sup> and the World Health Organization.<sup>26</sup> The study protocol  
48 does not mandate a particular therapy, however corticosteroids, immune modulators and  
49  
50  
51  
52  
53  
54  
55  
56  
57  
58  
59  
60

1  
2  
3 antiviral therapy will be all recorded. Conservative fluid management is recommended where  
4 neutral balance should be targeted and intravenous resuscitation should be reserved for shock  
5 treatment in both groups and fluid balance will be recorded.  
6  
7  
8  
9

## 10 11 12 **Blinding**

13  
14  
15 Due to the nature of the study intervention, blinding will not be possible.  
16  
17

## 18 19 20 **Recruitment schedule and enrollment procedures**

21  
22  
23 Schedule of assessments is detailed in **Table 2**. All non-intubated subjects will be screened  
24 upon admission to the ICU. Screening evaluations must be completed before randomization. A  
25 screening log will be kept to monitor and report the size of the patient population from which  
26 eligible patients have been randomized.  
27  
28

29  
30  
31 Co-enrollment in another RCT is permissible as long as inclusion in the other RCT would not  
32 confound the results of this trial and after discussion with the steering committees of the other  
33 studies.  
34  
35  
36  
37

## 38 39 **Data collection**

40  
41 Baseline data on demographics, admission diagnosis and clinical information will be collected  
42 to. Clinical information will include Acute Physiology and Chronic Health Evaluation (APACHE)  
43 II score,<sup>27</sup> source of admission, ICU admission category (elective, emergency or non-surgical),  
44 ICU admission diagnosis (as defined by the APACHE III severity of illness scoring system) and  
45 co-morbidities (as defined by the APACHE II severity of illness scoring system).  
46  
47  
48  
49

50  
51  
52 During ICU and hospital stay, collection of clinical information will be recorded until discharge  
53 from ICU or 28 days after randomization.  
54  
55  
56  
57  
58  
59  
60

## Outcomes

The primary outcome will be 28-day all-cause mortality. Secondary outcomes will include requirement for endotracheal intubation within 28 days, ICU mortality, hospital mortality, ICU-free days at day 28, ventilator-free days at day 28, renal replacement therapy-free days at day 28, vasopressor-free days at day 28, skin pressure injuries, tolerance of helmet (>1-hour use), 180-day mortality (Follow-up study), and 180-day EuroQoL (EQ)-5D-5L<sup>28</sup> (Follow-up study).

There will be follow up at day 180 and data about vital status, functional status (EuroQoL (EQ)-5D-5L), length of stay in hospital, date and cause of death will be recorded. For participants discharged from hospital prior to day 180, vital status at time of discharge will be recorded. For patients who have been discharged from hospital, follow up will be conducted by telephone. Hospital mortality will be censored at 180 days from the date of enrollment.

## Data analysis

A formal statistical analysis plan will be agreed upon and placed in the public domain before the study database is locked for the analysis of the primary outcome. The primary outcome will be compared in the intention to-treat and per-protocol cohorts (effectiveness analysis) using the chi-square test. Results will be reported as relative risk with 95% CI. Kaplan–Meier curves will be plotted to assess the time from enrollment to death in the hospital and will be compared by means of the log-rank test. A two-tailed P value <0.05 will be considered to indicate statistical significance. SAS software, version 9.2 (SAS Institute) will be used for all the analyses. A detailed statistical analysis plan will be published subsequently.

A priori analysis will be done for the following subgroups:

- I. Patients with moderate ARDS ( $\text{PaO}_2/\text{FiO}_2$  ratio 100-200) and patients with severe ARDS ( $\text{PaO}_2/\text{FiO}_2$  ratio <100)

- 1
- 2
- 3 II. Obese patients (body mass index  $>30 \text{ kg/m}^2$ ) and patients with body mass index
- 4
- 5  $\leq 30$
- 6
- 7 III. Patients aged  $>65$  years and  $\leq 65$  years
- 8
- 9 IV. APACHE II score higher or lower than the median of enrolled patients
- 10

11 For the occasional randomized patient who is withdrawn from the trial and allows use of data,  
12 the patient's data will be included in the group to which he/she was allocated as per the  
13 intention-to-treat principle and the reason of withdrawal will be documented.  
14  
15  
16  
17  
18  
19  
20

### 21 **Trial management and monitoring**

22 The study Steering Committee members will be responsible for overseeing the conduct of the  
23 trial, for upholding or modifying study procedures as needed, addressing challenges with  
24 protocol implementation, formulating the analysis plan, reviewing and interpreting the data, and  
25 preparing the manuscript. This will be achieved through meetings (in-person or by conference  
26 calls) at least quarterly.  
27  
28  
29  
30  
31  
32  
33

34 Several measures are taken to minimize, observe and document any potential safety concerns.  
35 First, any unexpected safety concerns will be reported immediately to the Steering Committee.  
36 Second, an independent Data Safety Monitoring Board will be monitoring the safety of the trial.  
37 Lastly, interim analyses will be conducted after recruiting  $1/3$  and  $2/3$  of the total patients and  
38 the interim test statistics will be the primary outcome analysis for both safety and effectiveness.  
39 The Data Safety Monitoring Board will use formal stopping rules based on the primary endpoint  
40 of 28-day mortality. The trial may be stopped for safety ( $p < 0.01$ ) or effectiveness ( $p < 0.001$ ).  
41 There will be no plans to terminate the trial for futility. We will account for alpha spending by the  
42 O'Brien Fleming method and the final p value will be considered at 0.048. The principles used in  
43 the conduct of safety monitoring and reporting in this trial are those outlined by Cook et al.<sup>29</sup>  
44  
45  
46  
47  
48  
49  
50  
51  
52  
53  
54  
55  
56  
57  
58  
59  
60

1  
2  
3 In this trial, reporting of serious adverse events will be restricted to events that are not captured  
4 as study outcome and are considered to be related to the helmet NIV (possibly, probably or  
5 definitely).<sup>29</sup> These may include skin ulceration at the neck seal, patient intolerance (i.e.,  
6 claustrophobia), barotrauma (development of pneumothorax), cardiovascular events (i.e.,  
7 cardiac arrest and hypotension with drop in blood pressure to systolic <90 mm Hg) and device  
8 complications (i.e., helmet deflation).  
9  
10  
11  
12  
13  
14  
15

### 16 **Ethics and dissemination**

17  
18 The study will be conducted according to the principles of the latest version of Good Clinical  
19 Practice (GCP) and in accordance with all relevant local ethical, regulatory, and legal  
20 requirements. A manuscript with the results of the primary study will be published in a peer-  
21 reviewed journal. Separate manuscripts will be written on secondary aims, and these will also  
22 be submitted for publication in peer reviewed journals as well.  
23  
24  
25  
26  
27  
28  
29

### 30 **Discussion**

31  
32 The importance of this study stems from the current pandemic situation as different treatment  
33 modalities are being sought to answer important clinical questions. Available literature on the  
34 evaluation of helmet NIV as a respiratory support modality in COVID-19 patients is limited.  
35 Table 3 provides the list of ongoing RCTs on helmet NIV. This study aims to contribute to the  
36 existing literature and in turn influence clinical practice.  
37  
38  
39  
40  
41  
42  
43

44 The first patient was enrolled in February 2021 and we aim to recruit more sites across the  
45 region. As of April 5, 2021, we have enrolled 50 patients. There are several sites that are  
46 processing IRB approvals.  
47  
48  
49

50 The main limitation to our study is inability to blind the given allocation due to the nature of the  
51 intervention.  
52  
53  
54  
55  
56  
57  
58  
59  
60

## REFERENCES

1. World Health Organization. <https://covid19.who.int/> Accessed on March 29, 2021.
2. Marini J, Gattinoni L. Management of COVID-19 Respiratory Distress. *Jama* 2020
3. Guan W-j, Ni Z-y, Hu Y, et al. Clinical Characteristics of Coronavirus Disease 2019 in China. *New England Journal of Medicine* 2020;382(18):1708-20. doi: 10.1056/NEJMoa2002032
4. Ñamendys-Silva SA. Respiratory support for patients with COVID-19 infection. *The Lancet Respiratory medicine* 2020;8(4):e18.
5. Richardson S, Hirsch JS, Narasimhan M, et al. Presenting Characteristics, Comorbidities, and Outcomes Among 5700 Patients Hospitalized With COVID-19 in the New York City Area. *Jama*
6. Xu X, Zhang X, Hu S, et al. Noninvasive Ventilation in Acute Hypoxemic Nonhypercapnic Respiratory Failure: A Systematic Review and Meta-Analysis, 2017.
7. Brambilla AM, Aliberti S, Prina E, et al. Helmet CPAP vs. oxygen therapy in severe hypoxemic respiratory failure due to pneumonia. *Intensive Care Med* 2014;40(7):942-9. doi: 10.1007/s00134-014-3325-5 [published Online First: 2014/05/13]
8. Arulkumaran N, Brealey D, Howell D, et al. Use of non-invasive ventilation for patients with COVID-19: a cause for concern? *The Lancet Respiratory medicine* 2020 doi: 10.1016/S2213-2600(20)30181-8
9. Rodriguez AME, Papadakos PJ, Carron M, et al. Clinical review: Helmet and non-invasive mechanical ventilation in critically ill patients. *Critical Care* 2013;17(2):223.
10. Patroniti N, Foti G, Manfio A, et al. Head helmet versus face mask for non-invasive continuous positive airway pressure: a physiological study. *Intensive care medicine* 2003;29(10):1680.
11. Cosentini R, Brambilla AM, Aliberti S, et al. Helmet continuous positive airway pressure vs oxygen therapy to improve oxygenation in community-acquired pneumonia: a randomized, controlled trial. *Chest* 2010;138(1):114-20. doi: 10.1378/chest.09-2290 [published Online First: 2010/02/16]
12. Patel BK, Wolfe KS, Pohlman AS, et al. Effect of Noninvasive Ventilation Delivered by Helmet vs Face Mask on the Rate of Endotracheal Intubation in Patients With Acute Respiratory Distress Syndrome: A Randomized Clinical Trial. *JAMA* 2016;315(22):2435.
13. Foti G, Sangalli F, Berra L, et al. Is helmet CPAP first line pre-hospital treatment of presumed severe acute pulmonary edema? *Intensive care medicine* 2009;35(4):656.

- 1  
2  
3 14. Squadrone V, Cocha M, Cerutti E, et al. Continuous positive airway pressure for treatment of  
4 postoperative hypoxemia: a randomized controlled trial. *Jama* 2005;293(5):589.
- 5  
6 15. Patel BK, Wolfe KS, MacKenzie E, et al. One Year Outcomes in Patients with Acute  
7 Respiratory Distress Syndrome Enrolled in a Randomized Clinical Trial of Helmet versus  
8 Facemask Noninvasive Ventilation. *Critical care medicine* 2018;46(7):1078.
- 9  
10 16. Liu Q, Gao Y, Chen R, et al. Noninvasive ventilation with helmet versus control strategy in  
11 patients with acute respiratory failure: a systematic review and meta-analysis of  
12 controlled studies. *Critical Care* 2016;20(1)
- 13  
14 17. Luo Y, Luo Y, Li Y, et al. Helmet CPAP versus Oxygen Therapy in Hypoxemic Acute  
15 Respiratory Failure: A Meta-Analysis of Randomized Controlled Trials, 2016.
- 16  
17 18. Ferreyro BL, Angriman F, Munshi L, et al. Association of Noninvasive Oxygenation  
18 Strategies With All-Cause Mortality in Adults With Acute Hypoxemic Respiratory Failure:  
19 A Systematic Review and Meta-analysis. *Jama* 2020;324(1):57-67. doi:  
20 10.1001/jama.2020.9524
- 21  
22 19. Grieco DL, Menga LS, Cesarano M, et al. Effect of Helmet Noninvasive Ventilation vs High-  
23 Flow Nasal Oxygen on Days Free of Respiratory Support in Patients With COVID-19  
24 and Moderate to Severe Hypoxemic Respiratory Failure: The HENIVOT Randomized  
25 Clinical Trial. *Jama* 2021 doi: 10.1001/jama.2021.4682
- 26  
27 20. Bellani G, Laffey J, Pham T, et al. Epidemiology, Patterns of Care, and Mortality for Patients  
28 With Acute Respiratory Distress Syndrome in Intensive Care Units in 50 Countries.  
29 *Jama* 2016;315(8):788.
- 30  
31 21. Marzullo P, Verti B, Savia G, et al. The relationship between active ghrelin levels and human  
32 obesity involves alterations in resting energy expenditure. *J Clin Endocrinol Metab*  
33 2004;89(2):936-39. doi: 10.1210/jc.2003-031328
- 34  
35 22. Arabi Y, Al Aseri Z, Alaama T, et al. National Approach to Standardize and Improve  
36 Mechanical Ventilation. *Annals of thoracic medicine* 2019;14(2):101.
- 37  
38 23. Alhazzani W, Al-Suwaidan F, Al Aseri Z, et al. The saudi critical care society clinical practice  
39 guidelines on the management of COVID-19 patients in the intensive care unit. *Saudi*  
40 *Critical Care Journal* 2020;4(2):27-44. doi: 10.4103/sccj.sccj\_15\_20
- 41  
42 24. Alhazzani W, Evans L, Alshamsi F, et al. Surviving Sepsis Campaign Guidelines on the  
43 Management of Adults With Coronavirus Disease 2019 (COVID-19) in the ICU: First  
44 Update. *Critical Care Medicine* 2021;49(3):e219-e34. doi:  
45 10.1097/ccm.0000000000004899
- 46  
47  
48  
49  
50  
51  
52  
53  
54  
55  
56  
57  
58  
59  
60

- 1  
2  
3 25. Alhazzani W, Møller MH, Arabi YM, et al. Surviving Sepsis Campaign: Guidelines on the  
4 Management of Critically Ill Adults with Coronavirus Disease 2019 (COVID-19). *Critical*  
5 *Care Medicine* 2020;48(6):e440-e69. doi: 10.1097/ccm.0000000000004363  
6  
7  
8 26. Coronavirus disease (COVID-19) technical guidance: Patient management.  
9 [https://www.who.int/emergencies/diseases/novel-coronavirus-2019/technical-](https://www.who.int/emergencies/diseases/novel-coronavirus-2019/technical-guidance/patient-management)  
10 [guidance/patient-management](https://www.who.int/emergencies/diseases/novel-coronavirus-2019/technical-guidance/patient-management). Accessed 1 March 2021.  
11  
12  
13 27. Knaus WA, Draper EA, Wagner DP, et al. APACHE II: a severity of disease classification  
14 system. *Crit Care Med* 1985;13(10):818-29. [published Online First: 1985/10/01]  
15  
16 28. Herdman M, Gudex C, Lloyd A, et al. Development and preliminary testing of the new five-  
17 level version of EQ-5D (EQ-5D-5L). *Quality of life research* 2011;20(10):1727-36.  
18  
19 29. Cook D, Lauzier F, Rocha MG, et al. Serious adverse events in academic critical care  
20 research. *CMAJ : Canadian Medical Association journal = journal de l'Association*  
21 *medicale canadienne* 2008;178(9):1181-84.  
22  
23  
24  
25  
26  
27  
28  
29  
30  
31  
32  
33  
34  
35  
36  
37  
38  
39  
40  
41  
42  
43  
44  
45  
46  
47  
48  
49  
50  
51  
52  
53  
54  
55  
56  
57  
58  
59  
60



## Acknowledgements

The authors would like to thank the Data Safety & Monitoring Board: Chair: Dr. Nicholas S. Hill (Professor of Medicine, Chief of Pulmonary, Critical Care and Sleep Division, Tufts Medical Center, Boston, Massachusetts, USA), DSM members: Dr. Stefano Nava (Professor of Respiratory Medicine University of Bologna, Chief of the Respiratory and Critical Care Sant' Orsola Hospital Bologna, Specialist in Respiratory Medicine and Intensive Care Medicine, University of Bologna, Italy), Dr. James Mojica (Vice Chief and Clinical Director of Pulmonary & Critical Care, Director, The Sleep Center at Spaulding, Massachusetts General Hospital, USA) and Dr. Michael Harhay (Assistant Professor of Epidemiology and Medicine-Pulmonary and Critical Care, Department of Biostatistics, Epidemiology and Informatics, University of Pennsylvania USA).

**Contributors** YA is the principal investigator and participated in the project concept, design, final approval, and manuscript preparation, review and submission. HT, SD, HD, SA, MH, HH, MM, OZ, EQ, WW, SQ, FH, JC, MS, AH, AM, AE, AB, ZA ZD, AK, RQ, AG, AT, KG, HG, AA, FB, HS, MO, YI, AF participated in the critical revision, final approval of the protocol and manuscript preparation, review and submission. All authors agree to be accountable for the accuracy and integrity of the work.

**Funding** The study is funded by King Abdullah International Medical Research Center (RC 20/306/R). The study sponsor does not have any role in the study design, collection, management, analysis, and interpretation of data as well as writing of the report.

**Competing interests** None declared

## Ethics approval

The study has been approved by the Institutional Review Board (IRB) of Ministry of National Guard Health Affairs (MNGHA) and the respective Institutional Review Boards of all the other centers.

**Patient consent for publication** Not required.

**Provenance and peer review** Not commissioned, externally peer reviewed.

**Table 1.** Eligibility Criteria

|                                |                                                                                                                                                                                                                                                                                                                                                                                                                                                                                                                                                                                                                                                                                                                                                                                                                |
|--------------------------------|----------------------------------------------------------------------------------------------------------------------------------------------------------------------------------------------------------------------------------------------------------------------------------------------------------------------------------------------------------------------------------------------------------------------------------------------------------------------------------------------------------------------------------------------------------------------------------------------------------------------------------------------------------------------------------------------------------------------------------------------------------------------------------------------------------------|
| <b>Inclusion Criteria</b>      | <ol style="list-style-type: none"> <li>1. Suspected or confirmed COVID-19*</li> <li>2. Aged <math>\geq 14</math> years old. ICUs that use other age cut-off for adult patients will adhere to their local standard (16 or 18 years)</li> <li>3. Acute hypoxemic respiratory failure based on Pao<sub>2</sub>/Fio<sub>2</sub> ratio <math>&lt; 200</math> despite supplemental oxygen with a partial /non-rebreathing mask at a flow rate <math>&gt;10</math> L/min or above</li> <li>4. Able to follow instructions (e.g. squeeze hand on command, eye contact with care provider, stick out tongue on command,etc.)</li> </ol>                                                                                                                                                                                |
| <b>Exclusion Criteria</b>      | <ol style="list-style-type: none"> <li>1. Prior intubation during this hospital admission</li> <li>2. Cardiopulmonary arrest</li> <li>3. Glasgow coma scale <math>&lt; 12</math></li> <li>4. Tracheostomy</li> <li>5. Upper airway obstruction</li> <li>6. Active epistaxis</li> <li>7. Requirement for more than one vasopressor to maintain mean arterial pressure <math>&gt; 65</math> mm Hg.</li> <li>8. Pregnancy</li> <li>9. Imminent intubation</li> <li>10. Patients with do-not-intubate orders (or equivalent)</li> <li>11. Enrolled in another trial for which co-enrolment is not approved including trials on mechanical ventilation</li> <li>12. Patients already treated with helmet</li> <li>13. Patients with chronic carbon dioxide retention (CO<sub>2</sub><math>&gt;45</math>)</li> </ol> |
| <b>Eligible non-randomized</b> | <ol style="list-style-type: none"> <li>1. Patient or substitute decision- maker declines consent</li> <li>2. ICU physician or other treating clinician declines consent</li> </ol>                                                                                                                                                                                                                                                                                                                                                                                                                                                                                                                                                                                                                             |

\*A suspected/probable COVID-19 case is defined as: At least two of the following symptoms: fever (measured or subjective), chills, rigors, myalgia, headache, sore throat, new olfactory and taste disorder(s) **OR** at least one of the following symptoms: cough, shortness of breath, or difficulty breathing **OR** severe respiratory illness with at least one of the following: Clinical or radiographic evidence of pneumonia, **OR** ARDS **AND** no alternative more likely diagnosis. A confirmed COVID-19 case is defined as: Detection of SARS-CoV-2 RNA in a respiratory specimen using a molecular amplification detection test such as rt-PCR.

**Table 2.** Schedule of assessments in the trial

| Task                                       | Screening | Randomization | Baseline | Day 1-28 | 180-Day Follow up |
|--------------------------------------------|-----------|---------------|----------|----------|-------------------|
| Assess eligibility to enter study          | X         |               |          |          |                   |
| Assess ability to gain consent & follow-up | X         |               |          |          |                   |
| Consent                                    | X         |               |          |          |                   |
| Demographics & eligibility checklist       | X         | X             | X        |          |                   |
| Laboratory data                            |           |               | X        | X        |                   |
| Vital signs                                |           |               | X        | X        |                   |
| Vital status up to Day 28 in the ICU       |           |               |          | X        | X                 |
| Vital and functional status                |           |               |          |          | X                 |
| Discharge date from ICU, from hospital     |           |               |          | X        | X                 |
| Adverse events                             |           |               |          | X        |                   |
| Protocol violation                         |           |               |          | X        |                   |

**Table 3.** List of ongoing registered clinical trials on helmet noninvasive ventilation

| <b>Trial</b>                                                                                                                                | <b>Registration</b> | <b>Interventions</b>                                       | <b>Design</b>     | <b>Countries</b> | <b>N</b> |
|---------------------------------------------------------------------------------------------------------------------------------------------|---------------------|------------------------------------------------------------|-------------------|------------------|----------|
| Helmet Non-Invasive Ventilation for COVID-19 Patients (Helmet-COVID)                                                                        | NCT04477668         | Helmet vs. standard of care                                | Multicenter RCT   | Saudi Arabia     | 320      |
| Comparison of High Flow Nasal Cannula (HFNC), Face-mask Non-Invasive Ventilation (NIV) & Helmet NIV in COVID-19 ARDS Patients (NIV COVID19) | NCT04715243         | High flow nasal cannula (HFNC) vs. helmet NIV vs. mask NIV | Multicenter RCT   | Oman             | 360      |
| Helmet CPAP Versus HFNC in COVID-19 (COVID HELMET)                                                                                          | NCT04395807         | HFNC vs. helmet CPAP                                       | Single center RCT | Sweden           | 120      |
| COVIDNOCHE Trial (HFNO Versus CPAP Helmet) in COVID-19 Pneumonia (COVIDNOCHE)                                                               | NCT04381923         | HFNC vs. helmet CPAP                                       | Single center RCT | USA              | 200      |
| Early CPAP in COVID-19 Patients With Respiratory Failure. (EC-COVID-RCT)                                                                    | NCT04326075         | Early helmet CPAP vs. current clinical practice            | Single center RCT | Italy            | 900      |

## Helmet-NIV Protocol

### Setup and preparation

- Use unheated, low-compliance, dual limb breathing circuit.
- Insert a bacterial/viral filter at the expiratory port of the ventilator.
- Carry out the required preoperational check.
- To avoid patient-ventilator asynchrony, explain the application and the procedure of the helmet to the patient.
- Insert the earplugs into patient ears.
- Use the under-arm pads to avoid strap pressure.

### Initial setup

- Can be used with a ventilator or NIV machines.
- Set up the ventilator on Pressure Support Ventilation (PSV).
- PSV 8-10 cm H<sub>2</sub>O pressure, positive end-expiratory pressure (PEEP) 10 cm H<sub>2</sub>O pressure, FiO<sub>2</sub> 100%.
- Flow rate >50 L/min, inspiratory rise time 50 msec, End Flow/Cycling off 50% of maximal inspiratory flow.

### Titration

- Increase PEEP by 2-3 cm H<sub>2</sub>O every 3 minutes to achieve SpO<sub>2</sub> ≥ 92% on FiO<sub>2</sub> ≤ 60%
- Higher PEEP than what is used on face mask NIV is allowed and tolerated.
- Increase PS by 2-3 cm every 3 minutes to achieve respiratory rate (RR) ≤ 25/min or clear patient comfort.
- The maximal allowed PS + PEEP is 30 cm H<sub>2</sub>O.
- Helmet should be applied continuously for at least 48 hours.
- Titrate FiO<sub>2</sub> to ≤60% as soon as possible.

### Sedation

- Dexmedetomidine may be used to improve compliance with the helmet. However, other intravenous sedatives such as benzodiazepines or intravenous narcotics should not be used.

### Weaning when clinical condition allows

- Titrate PS by 2 cm H<sub>2</sub>O every 3 hours if RR ≤ 25/min.
- Titrate PEEP by 2 cm H<sub>2</sub>O every 3 hours if SpO<sub>2</sub> >92% on <60% FiO<sub>2</sub>.
- If RR ≤25/min on PSV ≤8 cm and SpO<sub>2</sub> >92% on FiO<sub>2</sub> ≤50% and PEEP ≤8 cm H<sub>2</sub>O, the helmet can be discontinued and patient switched to high-flow nasal cannula, or oxygen supply at O<sub>2</sub> at 6L/min or higher.  
Helmet NIV could be resumed at any time if the respiratory rate was greater than 25 breaths/min and/or SpO<sub>2</sub> was lower than 92% on FiO<sub>2</sub> of ≥60% .

### Nursing Care

- Perform oral care/suction before helmet application.
- Place a nasogastric tube before helmet application if felt necessary by treating physician.
- A suction Yankauer for suctioning and a straw for drinking can be introduced through the patient port without removing the helmet.

- 1  
2  
3 - Intravenous sedation (Dexmedetomidine or others) can be used at the discretion of the  
4 treating physician to assure patient comfort.  
5  
6

### 7 **Equipment required**

- 8 - Mechanical ventilator (BP 840, PB 980, Servo-I, Drager V 500, Astral and V680)  
9 - Unheated Double lumen circuit  
10 - Bacterial/viral filter  
11 - Subsalve helmet or equivalent  
12 - Under arm pads (any kind)  
13 - Ear plugs  
14  
15

### 16 **General recommendations to consider intubation for patients on NIV (assessed within 4 17 hours and at frequent intervals throughout NIV treatment):**

- 18 - Neurologic deterioration (not attributed to sedation)  
19 - Persistent or worsening respiratory failure of NIV:  
20     o oxygen saturation <88%  
21     o respiratory rate >36/min  
22     o P/F ratio <100  
23     o a persistent requirement of FiO<sub>2</sub> ≥70%  
24 - Intolerance of face mask or helmet  
25 - Airway bleeding  
26 - Copious respiratory secretions  
27 - Respiratory acidosis with pH <7.25  
28 - Hemodynamic instability  
29 - Significant radiologic worsening  
30  
31

### 32 **Humidification**

33 Appropriate level of humidification can be achieved via bubble humidifier with external  
34 oxygen flow of 5 L/Min entrained into the ventilator circuit proximal to the patient helmet.  
35  
36  
37  
38  
39  
40  
41  
42  
43  
44  
45  
46  
47  
48  
49  
50  
51  
52  
53  
54  
55  
56  
57  
58  
59  
60

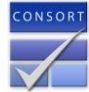

## CONSORT 2010 checklist of information to include when reporting a randomised trial\*

| Section/Topic                    | Item No | Checklist item                                                                                                                                                                              | Reported on page No |
|----------------------------------|---------|---------------------------------------------------------------------------------------------------------------------------------------------------------------------------------------------|---------------------|
| <b>Title and abstract</b>        |         |                                                                                                                                                                                             |                     |
|                                  | 1a      | Identification as a randomised trial in the title                                                                                                                                           | 1                   |
|                                  | 1b      | Structured summary of trial design, methods, results, and conclusions (for specific guidance see CONSORT for abstracts)                                                                     | 6                   |
| <b>Introduction</b>              |         |                                                                                                                                                                                             |                     |
| Background and objectives        | 2a      | Scientific background and explanation of rationale                                                                                                                                          | 8-10                |
|                                  | 2b      | Specific objectives or hypotheses                                                                                                                                                           | 10                  |
| <b>Methods</b>                   |         |                                                                                                                                                                                             |                     |
| Trial design                     | 3a      | Description of trial design (such as parallel, factorial) including allocation ratio                                                                                                        | 10                  |
|                                  | 3b      | Important changes to methods after trial commencement (such as eligibility criteria), with reasons                                                                                          | not applicable      |
| Participants                     | 4a      | Eligibility criteria for participants                                                                                                                                                       | 11                  |
|                                  | 4b      | Settings and locations where the data were collected                                                                                                                                        | 10                  |
| Interventions                    | 5       | The interventions for each group with sufficient details to allow replication, including how and when they were actually administered                                                       | 11-12               |
| Outcomes                         | 6a      | Completely defined pre-specified primary and secondary outcome measures, including how and when they were assessed                                                                          | 15                  |
|                                  | 6b      | Any changes to trial outcomes after the trial commenced, with reasons                                                                                                                       | not applicable      |
| Sample size                      | 7a      | How sample size was determined                                                                                                                                                              | 11                  |
|                                  | 7b      | When applicable, explanation of any interim analyses and stopping guidelines                                                                                                                | 15                  |
| Randomisation:                   |         |                                                                                                                                                                                             | 10                  |
| Sequence generation              | 8a      | Method used to generate the random allocation sequence                                                                                                                                      |                     |
|                                  | 8b      | Type of randomisation; details of any restriction (such as blocking and block size)                                                                                                         | 10                  |
| Allocation concealment mechanism | 9       | Mechanism used to implement the random allocation sequence (such as sequentially numbered containers), describing any steps taken to conceal the sequence until interventions were assigned | 10                  |
| Implementation                   | 10      | Who generated the random allocation sequence, who enrolled participants, and who assigned participants to interventions                                                                     | 10                  |
| Blinding                         | 11a     | If done, who was blinded after assignment to interventions (for example, participants, care providers, those                                                                                | 14                  |

|                                                      |     |                                                                                                                                                   |                |
|------------------------------------------------------|-----|---------------------------------------------------------------------------------------------------------------------------------------------------|----------------|
|                                                      |     | assessing outcomes) and how                                                                                                                       |                |
|                                                      | 11b | If relevant, description of the similarity of interventions                                                                                       | not applicable |
| Statistical methods                                  | 12a | Statistical methods used to compare groups for primary and secondary outcomes                                                                     | 15             |
|                                                      | 12b | Methods for additional analyses, such as subgroup analyses and adjusted analyses                                                                  |                |
| <b>Results</b>                                       |     |                                                                                                                                                   |                |
| Participant flow (a diagram is strongly recommended) | 13a | For each group, the numbers of participants who were randomly assigned, received intended treatment, and were analysed for the primary outcome    | not applicable |
|                                                      | 13b | For each group, losses and exclusions after randomisation, together with reasons                                                                  | not applicable |
| Recruitment                                          | 14a | Dates defining the periods of recruitment and follow-up                                                                                           | not applicable |
|                                                      | 14b | Why the trial ended or was stopped                                                                                                                | not applicable |
| Baseline data                                        | 15  | A table showing baseline demographic and clinical characteristics for each group                                                                  | not applicable |
| Numbers analysed                                     | 16  | For each group, number of participants (denominator) included in each analysis and whether the analysis was by original assigned groups           | not applicable |
| Outcomes and estimation                              | 17a | For each primary and secondary outcome, results for each group, and the estimated effect size and its precision (such as 95% confidence interval) | not applicable |
|                                                      | 17b | For binary outcomes, presentation of both absolute and relative effect sizes is recommended                                                       | not applicable |
| Ancillary analyses                                   | 18  | Results of any other analyses performed, including subgroup analyses and adjusted analyses, distinguishing pre-specified from exploratory         | not applicable |
| Harms                                                | 19  | All important harms or unintended effects in each group (for specific guidance see CONSORT for harms)                                             | 16             |
| <b>Discussion</b>                                    |     |                                                                                                                                                   |                |
| Limitations                                          | 20  | Trial limitations, addressing sources of potential bias, imprecision, and, if relevant, multiplicity of analyses                                  | 17             |
| Generalisability                                     | 21  | Generalisability (external validity, applicability) of the trial findings                                                                         | 17             |
| Interpretation                                       | 22  | Interpretation consistent with results, balancing benefits and harms, and considering other relevant evidence                                     | not applicable |
| <b>Other information</b>                             |     |                                                                                                                                                   |                |
| Registration                                         | 23  | Registration number and name of trial registry                                                                                                    | 6              |
| Protocol                                             | 24  | Where the full trial protocol can be accessed, if available                                                                                       | 21             |
| Funding                                              | 25  | Sources of funding and other support (such as supply of drugs), role of funders                                                                   |                |

\*We strongly recommend reading this statement in conjunction with the CONSORT 2010 Explanation and Elaboration for important clarifications on all the items. If relevant, we also recommend reading CONSORT extensions for cluster randomised trials, non-inferiority and equivalence trials, non-pharmacological treatments, herbal interventions, and pragmatic trials. Additional extensions are forthcoming: for those and for up to date references relevant to this checklist, see [www.consort-statement.org](http://www.consort-statement.org).



# BMJ Open

## Helmet noninvasive ventilation for COVID-19 patients "Helmet-COVID": study protocol for a multicenter randomized controlled trial

|                               |                                                                                                                                                                                                                                                                                                                                                                                                                                                                                                                                                                                                                                                                                                                                                                                                                                                                                                                                                                                                                                                                                                                                                                                                                                                                                                                                                                                                                                                                                                                                                                                                                                                                                                                                                                                                                                                                                                                                                                                                                                                                                                                                                                                                                                                                                                                                                                                                                                                                                                                                                                                                                                                                                                                             |
|-------------------------------|-----------------------------------------------------------------------------------------------------------------------------------------------------------------------------------------------------------------------------------------------------------------------------------------------------------------------------------------------------------------------------------------------------------------------------------------------------------------------------------------------------------------------------------------------------------------------------------------------------------------------------------------------------------------------------------------------------------------------------------------------------------------------------------------------------------------------------------------------------------------------------------------------------------------------------------------------------------------------------------------------------------------------------------------------------------------------------------------------------------------------------------------------------------------------------------------------------------------------------------------------------------------------------------------------------------------------------------------------------------------------------------------------------------------------------------------------------------------------------------------------------------------------------------------------------------------------------------------------------------------------------------------------------------------------------------------------------------------------------------------------------------------------------------------------------------------------------------------------------------------------------------------------------------------------------------------------------------------------------------------------------------------------------------------------------------------------------------------------------------------------------------------------------------------------------------------------------------------------------------------------------------------------------------------------------------------------------------------------------------------------------------------------------------------------------------------------------------------------------------------------------------------------------------------------------------------------------------------------------------------------------------------------------------------------------------------------------------------------------|
| Journal:                      | <i>BMJ Open</i>                                                                                                                                                                                                                                                                                                                                                                                                                                                                                                                                                                                                                                                                                                                                                                                                                                                                                                                                                                                                                                                                                                                                                                                                                                                                                                                                                                                                                                                                                                                                                                                                                                                                                                                                                                                                                                                                                                                                                                                                                                                                                                                                                                                                                                                                                                                                                                                                                                                                                                                                                                                                                                                                                                             |
| Manuscript ID                 | bmjopen-2021-052169.R1                                                                                                                                                                                                                                                                                                                                                                                                                                                                                                                                                                                                                                                                                                                                                                                                                                                                                                                                                                                                                                                                                                                                                                                                                                                                                                                                                                                                                                                                                                                                                                                                                                                                                                                                                                                                                                                                                                                                                                                                                                                                                                                                                                                                                                                                                                                                                                                                                                                                                                                                                                                                                                                                                                      |
| Article Type:                 | Protocol                                                                                                                                                                                                                                                                                                                                                                                                                                                                                                                                                                                                                                                                                                                                                                                                                                                                                                                                                                                                                                                                                                                                                                                                                                                                                                                                                                                                                                                                                                                                                                                                                                                                                                                                                                                                                                                                                                                                                                                                                                                                                                                                                                                                                                                                                                                                                                                                                                                                                                                                                                                                                                                                                                                    |
| Date Submitted by the Author: | 05-Jul-2021                                                                                                                                                                                                                                                                                                                                                                                                                                                                                                                                                                                                                                                                                                                                                                                                                                                                                                                                                                                                                                                                                                                                                                                                                                                                                                                                                                                                                                                                                                                                                                                                                                                                                                                                                                                                                                                                                                                                                                                                                                                                                                                                                                                                                                                                                                                                                                                                                                                                                                                                                                                                                                                                                                                 |
| Complete List of Authors:     | <p>Arabi, Yaseen; Ministry of National Guard Health Affairs, Intensive Care Department; King Saud bin Abdulaziz University for Health Sciences, King Abdullah International Medical Research Center<br/> Tlayjeh, Haytham; Ministry of National Guard Health Affairs, Intensive Care Department; King Saud bin Abdulaziz University for Health Sciences, King Abdullah International Medical Research Center<br/> Aldekhyl, Sara; Ministry of National Guard Health Affairs, Intensive Care Department; King Saud bin Abdulaziz University for Health Sciences, King Abdullah International Medical Research Center<br/> Al-Dorzi, Hasan; Ministry of National Guard Health Affairs, Intensive Care Department; King Saud bin Abdulaziz University for Health Sciences, King Abdullah International Medical Research Center<br/> Abdukahil, Sheryl Ann; Ministry of National Guard Health Affairs, Intensive Care Department; King Saud bin Abdulaziz University for Health Sciences, King Abdullah International Medical Research Center<br/> Al Harbi, Mohammad Khulaif ; Ministry of National Guard Health Affairs, Department of Anesthesia; King Saud bin Abdulaziz University for Health Sciences, King Abdullah International Medical Research Center<br/> Al Haji, Husain; Ministry of National Guard Health Affairs, Respiratory Services Department; King Saud bin Abdulaziz University for Health Sciences, King Abdullah International Medical Research Center<br/> Al Mutairi, Mohammed ; Ministry of National Guard Health Affairs, Respiratory Services Department; King Saud bin Abdulaziz University for Health Sciences, King Abdullah International Medical Research Center<br/> Al Zumai, Omar ; Ministry of National Guard Health Affairs, Respiratory Services Department; King Saud bin Abdulaziz University for Health Sciences<br/> Al Qasim, Eman; Ministry of National Guard Health Affairs, Intensive Care Department; King Saud bin Abdulaziz University for Health Sciences, King Abdullah International Medical Research Center<br/> Al Wehaibi , Wedyan; Ministry of National Guard Health Affairs, Intensive Care Department; King Saud bin Abdulaziz University for Health Sciences, King Abdullah International Medical Research Center<br/> Al Qahtani, Saad; Ministry of National Guard Health Affairs, Intensive Care Department; King Saud bin Abdulaziz University for Health Sciences<br/> Al-Hameed, Fahad ; Ministry of National Guard Health Affairs, Intensive Care Department; King Saud bin Abdulaziz University for Health Sciences, King Abdullah International Medical Research Center<br/> Chalabi, Jamal; Ministry of National Guard Health Affairs, Intensive Care</p> |

|                                 |                                                                                                                                                                                                                                                                                                                                                                                                                                                                                                                                                                                                                                                                                                                                                                                                                                                                                                                                                                                                                                                                                                                                                                                                                                                                                                                                                                                                                                                                                                                                                                                                                                                                                                                                                                                                                                                                                                                                                                                                                                                                                                                                                                                                                                                                                                                                                                                                                                                                                                                                                                                                                                                                                                                   |
|---------------------------------|-------------------------------------------------------------------------------------------------------------------------------------------------------------------------------------------------------------------------------------------------------------------------------------------------------------------------------------------------------------------------------------------------------------------------------------------------------------------------------------------------------------------------------------------------------------------------------------------------------------------------------------------------------------------------------------------------------------------------------------------------------------------------------------------------------------------------------------------------------------------------------------------------------------------------------------------------------------------------------------------------------------------------------------------------------------------------------------------------------------------------------------------------------------------------------------------------------------------------------------------------------------------------------------------------------------------------------------------------------------------------------------------------------------------------------------------------------------------------------------------------------------------------------------------------------------------------------------------------------------------------------------------------------------------------------------------------------------------------------------------------------------------------------------------------------------------------------------------------------------------------------------------------------------------------------------------------------------------------------------------------------------------------------------------------------------------------------------------------------------------------------------------------------------------------------------------------------------------------------------------------------------------------------------------------------------------------------------------------------------------------------------------------------------------------------------------------------------------------------------------------------------------------------------------------------------------------------------------------------------------------------------------------------------------------------------------------------------------|
|                                 | <p>Department; King Saud bin Abdulaziz University for Health Sciences, King Abdullah International Medical Research Center</p> <p>Alshahrani, Mohammed; Imam Abdulrahman Bin Faisal University King Fahd Hospital of the University, Department of Emergency and Critical Care</p> <p>Alharthy, Abdulrahman; King Saud Medical City, Intensive Care Department</p> <p>Mady, Ahmed; King Saud Medical City, Intensive Care Department; Tanta University, College of Medicine</p> <p>Bin Eshaq, Abdulhadi; King Khalid Hospital Najran</p> <p>A. Al bshabshe, Ali; King Khalid University; Aseer Central Hospital</p> <p>Al Aseri , Zohair; King Saud University Medical City, Emergency and Intensive Care Department</p> <p>Al Duhailib, Zainab; King Faisal Specialist Hospital and Research Center, Adult Critical Care Department</p> <p>Kharaba, Ayman; King Fahad Hospital Madinah, Pulmonary &amp; Critical Care Departments</p> <p>Alqahtani, Rakan ; King Khalid University Hospital</p> <p>Al Ghamdi, Adnan; Prince Sultan Military Medical City, Department of Intensive Care Services</p> <p>Altalag, Ali; Prince Sultan Military Medical City, Department of Intensive Care Services</p> <p>Alghamdi, Khalid ; King Faisal Specialist Hospital and Research Centre - Jeddah, Intensive Care Department</p> <p>Almaani, Mohammed; King Fahad Medical City, Department of Pulmonary &amp; Critical Care Medicine</p> <p>Algethamy, Haifa; King Abdulaziz University Hospital</p> <p>Al Aqeily, Ahmad ; Ministry of National Guard Health Affairs, Respiratory Services Department; King Saud bin Abdulaziz University for Health Sciences, King Abdullah International Medical Research Center</p> <p>Al Baseet, Faisal ; Ministry of National Guard Health Affairs, Respiratory Services Department; King Saud bin Abdulaziz University for Health Sciences, King Abdullah International Medical Research Center</p> <p>Al Samannoudi, Hashem ; Ministry of National Guard Health Affairs, Respiratory Services Department; King Saud bin Abdulaziz University for Health Sciences, King Abdullah International Medical Research Center</p> <p>Al Obaidi, Mohammed ; Ministry of National Guard Health Affairs, Respiratory Services Department; King Saud bin Abdulaziz University for Health Sciences, King Abdullah International Medical Research Center</p> <p>Ismail, Yassin; Ministry of National Guard Health Affairs, Respiratory Services Department; King Saud bin Abdulaziz University for Health Sciences, King Abdullah International Medical Research Center</p> <p>Al-Fares, Abdulrahman A; Al-Amiri Hospital , Department of Anesthesia, Critical Care Medicine and Pain Medicine</p> |
| <b>Primary Subject Heading</b>: | Intensive care                                                                                                                                                                                                                                                                                                                                                                                                                                                                                                                                                                                                                                                                                                                                                                                                                                                                                                                                                                                                                                                                                                                                                                                                                                                                                                                                                                                                                                                                                                                                                                                                                                                                                                                                                                                                                                                                                                                                                                                                                                                                                                                                                                                                                                                                                                                                                                                                                                                                                                                                                                                                                                                                                                    |
| Secondary Subject Heading:      | Intensive care, Respiratory medicine, Infectious diseases                                                                                                                                                                                                                                                                                                                                                                                                                                                                                                                                                                                                                                                                                                                                                                                                                                                                                                                                                                                                                                                                                                                                                                                                                                                                                                                                                                                                                                                                                                                                                                                                                                                                                                                                                                                                                                                                                                                                                                                                                                                                                                                                                                                                                                                                                                                                                                                                                                                                                                                                                                                                                                                         |
| Keywords:                       | Adult intensive & critical care < INTENSIVE & CRITICAL CARE, RESPIRATORY MEDICINE (see Thoracic Medicine), COVID-19                                                                                                                                                                                                                                                                                                                                                                                                                                                                                                                                                                                                                                                                                                                                                                                                                                                                                                                                                                                                                                                                                                                                                                                                                                                                                                                                                                                                                                                                                                                                                                                                                                                                                                                                                                                                                                                                                                                                                                                                                                                                                                                                                                                                                                                                                                                                                                                                                                                                                                                                                                                               |
|                                 |                                                                                                                                                                                                                                                                                                                                                                                                                                                                                                                                                                                                                                                                                                                                                                                                                                                                                                                                                                                                                                                                                                                                                                                                                                                                                                                                                                                                                                                                                                                                                                                                                                                                                                                                                                                                                                                                                                                                                                                                                                                                                                                                                                                                                                                                                                                                                                                                                                                                                                                                                                                                                                                                                                                   |

SCHOLARONE™  
Manuscripts



I, the Submitting Author has the right to grant and does grant on behalf of all authors of the Work (as defined in the below author licence), an exclusive licence and/or a non-exclusive licence for contributions from authors who are: i) UK Crown employees; ii) where BMJ has agreed a CC-BY licence shall apply, and/or iii) in accordance with the terms applicable for US Federal Government officers or employees acting as part of their official duties; on a worldwide, perpetual, irrevocable, royalty-free basis to BMJ Publishing Group Ltd ("BMJ") its licensees and where the relevant Journal is co-owned by BMJ to the co-owners of the Journal, to publish the Work in this journal and any other BMJ products and to exploit all rights, as set out in our [licence](#).

The Submitting Author accepts and understands that any supply made under these terms is made by BMJ to the Submitting Author unless you are acting as an employee on behalf of your employer or a postgraduate student of an affiliated institution which is paying any applicable article publishing charge ("APC") for Open Access articles. Where the Submitting Author wishes to make the Work available on an Open Access basis (and intends to pay the relevant APC), the terms of reuse of such Open Access shall be governed by a Creative Commons licence – details of these licences and which [Creative Commons](#) licence will apply to this Work are set out in our licence referred to above.

Other than as permitted in any relevant BMJ Author's Self Archiving Policies, I confirm this Work has not been accepted for publication elsewhere, is not being considered for publication elsewhere and does not duplicate material already published. I confirm all authors consent to publication of this Work and authorise the granting of this licence.

1  
2  
3  
4 **Helmet noninvasive ventilation for COVID-19 patients “Helmet-COVID”: study protocol**  
5 **for a multicenter randomized controlled trial**  
6  
7

8 **Yaseen Arabi, MD FCCP, FCCM, ATSF [YA]**

9 Intensive Care Department, Ministry of National Guard Health Affairs, Riyadh, Saudi Arabia  
10 King Abdullah International Medical Research Center  
11 King Saud Bin Abdulaziz University for Health Sciences, Riyadh, Saudi Arabia  
12 [yaseenarabi@yahoo.com](mailto:yaseenarabi@yahoo.com)  
13

14 **Haytham Tlayjeh, MD [HT]**

15 Intensive Care Department, Ministry of National Guard Health Affairs, Riyadh, Saudi Arabia  
16 King Abdullah International Medical Research Center  
17 King Saud Bin Abdulaziz University for Health Sciences, Riyadh, Saudi Arabia  
18 [tlayjehh@ngha.med.sa](mailto:tlayjehh@ngha.med.sa)  
19

20 **Sara Aldekhyl, MBBS [SD]**

21 College of Medicine, King Saud Bin Abdulaziz University for Health Sciences, Riyadh, Saudi  
22 Arabia  
23 King Abdullah International Medical Research Center  
24 Ministry of National Guard Health Affairs, Riyadh, Saudi Arabia  
25 [DakheelS@NGHA.MED.SA](mailto:DakheelS@NGHA.MED.SA)  
26  
27

28 **Hasan Al-Dorzi, MD [HD]**

29 Intensive Care Department, Ministry of National Guard Health Affairs, Riyadh, Saudi Arabia  
30 King Abdullah International Medical Research Center  
31 King Saud Bin Abdulaziz University for Health Sciences, Riyadh, Saudi Arabia  
32 [aldorzi@yahoo.com](mailto:aldorzi@yahoo.com)  
33

34 **Sheryl Ann Abdukahil, RN [SA]**

35 Intensive Care Department, Ministry of National Guard Health Affairs, Riyadh, Saudi Arabia  
36 King Abdullah International Medical Research Center  
37 King Saud Bin Abdulaziz University for Health Sciences, Riyadh, Saudi Arabia  
38 [abdukahil.sheryl@gmail.com](mailto:abdukahil.sheryl@gmail.com)  
39  
40

41 **Mohammad Khulaif Al Harbi, MD, FRCPC [MH]**

42 Department of Anesthesia, Ministry of National Guard Health Affairs, Riyadh, Saudi Arabia  
43 King Abdullah International Medical Research Center  
44 College of Medicine, King Saud Bin Abdulaziz University for Health Sciences, Riyadh, Saudi  
45 Arabia  
46 [HarbiMK@NGHA.MED.SA](mailto:HarbiMK@NGHA.MED.SA)  
47

48 **Husain Al Haji, RRT [HH]**

49 Respiratory Services Department, Ministry of National Guard Health Affairs, Riyadh, Saudi  
50 Arabia  
51 King Abdullah International Medical Research Center  
52 King Saud Bin Abdulaziz University for Health Sciences, Riyadh, Saudi Arabia  
53 [HajiH@NGHA.MED.SA](mailto:HajiH@NGHA.MED.SA)  
54  
55

56 **Mohammed Al Mutairi, RRT [MM]**

57 Respiratory Services Department, Ministry of National Guard Health Affairs, Riyadh, Saudi Arabia  
58 King Abdullah International Medical Research Center  
59 King Saud Bin Abdulaziz University for Health Sciences, Riyadh, Saudi Arabia  
60 [MutairyMM@NGHA.MED.SA](mailto:MutairyMM@NGHA.MED.SA)

**Omar Al Zumai, RRT [OZ]**

Respiratory Services Department, Ministry of National Guard Health Affairs, Riyadh, Saudi Arabia  
King Abdullah International Medical Research Center  
King Saud Bin Abdulaziz University for Health Sciences, Riyadh, Saudi Arabia  
[ZumaiO@NGHA.MED.SA](mailto:ZumaiO@NGHA.MED.SA)

**Eman Al Qasim, RN, MSN [EQ]**

Research Office, King Abdullah International Medical Research Center  
King Saud Bin Abdulaziz University for Health Sciences, Riyadh, Saudi Arabia  
Ministry of National Guard Health Affairs, Riyadh, Saudi Arabia  
[Eman77al-qasim@hotmail.com](mailto:Eman77al-qasim@hotmail.com)

**Wedyan Al Wehaibi [WW]**

Intensive Care Department, Ministry of National Guard Health Affairs, Riyadh, Saudi Arabia  
King Abdullah International Medical Research Center  
King Saud Bin Abdulaziz University for Health Sciences, Riyadh, Saudi Arabia  
[wedyan.mohammed@outlook.com](mailto:wedyan.mohammed@outlook.com)

**Saad Al Qahtani, MD, MMED, MAHA, FRCPC [SQ]**

Intensive Care Department, Ministry of National Guard Health Affairs, Riyadh, Saudi Arabia  
King Abdullah International Medical Research Center  
King Saud Bin Abdulaziz University for Health Sciences, Riyadh, Saudi Arabia  
[mcmasterer@hotmail.com](mailto:mcmasterer@hotmail.com)

**Fahad Al-Hameed, MD, FRCPC [FH]**

Intensive Care Department, Ministry of National Guard Health Affairs, Jeddah, Saudi Arabia  
King Abdullah International Medical Research Center  
King Saud Bin Abdulaziz University for Health Sciences, Jeddah, Saudi Arabia  
[HameedF@ngha.med.sa](mailto:HameedF@ngha.med.sa)

**Jamal Chalabi, MD [JC]**

Intensive Care Department, Ministry of National Guard Health Affairs, Al Ahsa, Saudi Arabia  
King Abdullah International Medical Research Center  
King Saud Bin Abdulaziz University for Health Sciences, Al Ahsa, Saudi Arabia  
[ChalabiJA@NGHA.MED.SA](mailto:ChalabiJA@NGHA.MED.SA)

**Mohammed Alshahrani, MBBS , SSC-EM , ArEM, FCCM [MS]**

Department of Emergency and Critical Care  
King Fahad Hospital of the University  
University of Dammam  
Al Khobar, Kingdom of Saudi Arabia  
[msshahrani@uod.edu.sa](mailto:msshahrani@uod.edu.sa)

**Abdulrahman Alharthy, MD [AH]**

Intensive Care Department  
King Saud Medical City  
Riyadh, Saudi Arabia  
[a\\_almshal@hotmail.com](mailto:a_almshal@hotmail.com)

**Ahmed Mady, MBBCH, MSc, MD,S-FCCM,FCCP [AM]**

Intensive Care Department  
King Saud Medical City  
Riyadh, Saudi Arabia  
College of Medicine  
Tanta University, Egypt  
[afmady@hotmail.com](mailto:afmady@hotmail.com)

**Abdulhadi Bin Eshaq, MD [AE]**

Intensive Care Department  
King Khalid Hospital, Najran  
[drbineshaq@gmail.com](mailto:drbineshaq@gmail.com)

**Ali Al Bshabshe, MD, SSCIM, JBIM, ArBIM, MRCP(UK),EDIC,CNSC [AB]**

Department of Critical Care Medicine  
King Khalid University, Aseer Central Hospital  
Abha, Kingdom of Saudi Arabia  
[albshabshe@yahoo.com](mailto:albshabshe@yahoo.com)

**Zohair Al Aseri, MD, FCEM, FRCPC [ZA]**

Emergency and Intensive Care Departments  
College of Medicine  
King Saud University  
Riyadh, Saudi Arabia  
[zohairalaseri@yahoo.com](mailto:zohairalaseri@yahoo.com)

**Zainab Al Duhailib, MBBS, EDIC, MSc [ZD]**

Adult Critical Care Department  
King Faisal Specialist Hospital & Research Center  
Riyadh, Saudi Arabia  
[zalduhailib65@kfshrc.edu.sa](mailto:zalduhailib65@kfshrc.edu.sa)

**Ayman Kharaba MD, ABIM,FRCPC [AK]**

Pulmonary & Critical Care Departments, King Fahad Hospital Madinah  
Critical Care Units- Madinah Region, Ministry of Health  
[a7yman@hotmail.com](mailto:a7yman@hotmail.com)

**Rakan Alqahtani, MD [RQ]**

Department of Critical Care, King Khalid University Hospital  
King Saud University Medical City, Riyadh, Saudi Arabia.  
[arakan@KSU.EDU.SA](mailto:arakan@KSU.EDU.SA)

**Adnan Al Ghamdi, MD [AG]**

Department of Intensive Care Services  
Prince Sultan Military Medical City  
Riyadh, Saudi Arabia  
[sbb1971@hotmail.com](mailto:sbb1971@hotmail.com)

**Ali Altalag, MD [AT]**

Department of Intensive Care Services  
Prince Sultan Military Medical City, Riyadh, Saudi Arabia  
[drtalag@yahoo.com](mailto:drtalag@yahoo.com)

**Khalid Alghamdi, MD [KG]**

Intensive Care Department  
King Faisal Specialist Hospital & Research Center, Jeddah, Saudi Arabia  
[kal-ghamdi@kfshrc.edu.sa](mailto:kal-ghamdi@kfshrc.edu.sa)

**Mohammed Almaani, MD,SSC- Em, ArBEM, UWO FCCM [MA]**

Department of Pulmonary & Critical Care Medicine  
King Fahad Medical City  
King Saud Bin Abdulaziz University for Health Sciences  
Riyadh, Saudi Arabia  
[malmaani@kfmc.med.sa](mailto:malmaani@kfmc.med.sa)

**Haifa Algethamy, MD [HG]**

Department of Anesthesia  
King Abdulaziz University Hospital  
Jeddah, Saudi Arabia  
[halgethamy2020@gmail.com](mailto:halgethamy2020@gmail.com)

**Ahmad Al Aqeily, RRT [AA]**

Respiratory Services Department, Ministry of National Guard Health Affairs, Riyadh, Saudi Arabia  
King Abdullah International Medical Research Center  
King Saud Bin Abdulaziz University for Health Sciences, Riyadh, Saudi Arabia  
[AqeilA@NGHA.MED.SA](mailto:AqeilA@NGHA.MED.SA)

**Faisal Al Baseet, RRT [FB]**

Respiratory Services Department, Ministry of National Guard Health Affairs, Riyadh, Saudi Arabia  
King Abdullah International Medical Research Center  
King Saud Bin Abdulaziz University for Health Sciences, Riyadh, Saudi Arabia  
[albasetfa@NGHA.MED.SA](mailto:albasetfa@NGHA.MED.SA)

**Hashem Al Samannoudi, RRT [HS]**

Respiratory Services Department, Ministry of National Guard Health Affairs, Riyadh, Saudi Arabia  
King Abdullah International Medical Research Center  
King Saud Bin Abdulaziz University for Health Sciences, Riyadh, Saudi Arabia  
[SamannoudiHa@NGHA.MED.SA](mailto:SamannoudiHa@NGHA.MED.SA)

**Mohammed Al Obaidi, RRT [MO]**

Respiratory Services Department, Ministry of National Guard Health Affairs, Riyadh, Saudi Arabia  
King Abdullah International Medical Research Center  
King Saud Bin Abdulaziz University for Health Sciences, Riyadh, Saudi Arabia  
[alobaidimo@NGHA.MED.SA](mailto:alobaidimo@NGHA.MED.SA)

**Yassin T Ismaiel RRT [YI]**

Respiratory Services Department, Ministry of National Guard Health Affairs, Riyadh, Saudi Arabia  
King Abdullah International Medical Research Center  
King Saud Bin Abdulaziz University for Health Sciences, Riyadh, Saudi Arabia  
[IsmaeilY@NGHA.MED.SA](mailto:IsmaeilY@NGHA.MED.SA)

**Abdulrahman A Al-Fares, MBChB, MRCP, ABIM, FRCPC [AF]**

Department of Anesthesia, Critical Care Medicine and Pain Medicine  
Al-Amiri Hospital, Ministry of Health, Kuwait  
[abdulrahman.alfares@gmail.com](mailto:abdulrahman.alfares@gmail.com)

**Corresponding author****Yaseen Arabi, MD FCCP, FCCM, ATSF [YA]**

(ORCID: 0000-0001-5735-6241)  
Intensive Care Department, Ministry of National Guard Health Affairs, Riyadh, Saudi Arabia  
King Abdullah International Medical Research Center  
King Saud Bin Abdulaziz University for Health Sciences, Riyadh, Saudi Arabia  
[yaseenarabi@yahoo.com](mailto:yaseenarabi@yahoo.com)



## Abstract

### Introduction

Noninvasive ventilation delivered by helmet is has been used for respiratory support of patients with acute hypoxemic respiratory failure due to COVID-19 pneumonia. The aim of this study is to compare helmet noninvasive ventilation with usual care versus usual care alone to reduce the mortality.

### Methods and analysis

This is a multicenter, pragmatic, parallel, randomized controlled trial that compares helmet noninvasive ventilation with usual care to usual care alone in 1:1 ratio. A total of 320 patients will be enrolled in this study. The primary outcome is 28-day all-cause mortality. The primary outcome will be compared between the two study groups in the intention-to-treat and per-protocol cohorts. An interim analysis will be conducted for both safety and effectiveness.

### Ethics and dissemination

Approvals are obtained from the Institutional Review Boards (IRBs) of each participating institution. Our findings will be published in peer-review journals and presented at relevant conferences and meetings.

**Trial registration number** NCT04477668 registered on July 20, 2020 **Article Summary**

### Strengths and limitations of this study

- This trial compares helmet NIV to usual care for respiratory support of patients with acute hypoxemic respiratory failure due to COVID-19 pneumonia.
- The trial is a multi-center, pragmatic, parallel randomized controlled trial.
- The main limitation is the unblinded design due to the nature of the intervention.



## Introduction

The novel severe acute respiratory syndrome coronavirus 2 (SARS-CoV-2) has led to a pandemic resulting in over 181 million cases and approximately 3.9 million fatalities as of June 29, 2021.<sup>1</sup> The resulting Coronavirus Disease 2019 (COVID-19) leads to severe pneumonia and acute respiratory distress syndrome (ARDS) among other organ injury.<sup>2</sup> ARDS may occur in up to 5% of infected patients.<sup>3-5</sup> Early in the pandemic, invasive mechanical ventilation was widely used because of concerns about noninvasive ventilation safety and efficacy. However, noninvasive ventilation (NIV) use increased with time, including mask NIV and helmet NIV.

NIV has been shown to be physiologic benefits in patients with acute hypoxemic respiratory failure (AHRF) secondary to pulmonary edema, atelectasis, or pneumonia.<sup>6</sup> It has been shown to improve arterial oxygenation by increasing functional residual capacity, shifting the tidal volume to a more compliant part of the pressure-volume curve, thus reducing both the work of breathing and the risk of tidal opening and closure of the airways.<sup>7</sup> NIV is commonly provided through nasal or oro-nasal interfaces. The resulting aerosol generation may increase the risk of transmission of pathogens to healthcare providers, raising concerns about the use of NIV in patients with viral pneumonia.<sup>8</sup> Helmet NIV has been used for AHRF including patients with COVID-19 pneumonia. The helmet surrounds the patient's entire head to provide positive pressure and supply oxygen and is sealed with a soft, airtight collar that wraps around the neck. Due to this design, it has advantages over the nasal and oro-nasal interfaces. These include less air leaks, no skin or nasal bridge skin injuries, no eye irritation, fitting for different facial contours,<sup>9</sup> and hypothetically less dissemination of aerosols in the environment. However, helmet interface may be associated with increase in dead space (especially if the settings are not used appropriately), claustrophobia, discomfort, and difficulty in access for suction and feeding.

1  
2  
3 Evaluation of helmet NIV as a respiratory support modality started more than two decades  
4 ago.<sup>10</sup> Helmet NIV has been investigated as a treatment for different forms of AHRF in adults  
5 in various settings, such as pre-hospital ambulance, emergency department and ICU.<sup>7 11-15</sup>  
6  
7 However, earlier clinical studies are relatively scarce and mostly small in size, and often  
8 used improvement in oxygenation and intubation rate as primary outcomes.<sup>6</sup>  
9  
10 However, the evidence on helmet NIV for AHRF is growing. A systematic review of  
11 randomized controlled trials (RCTs) and observational studies published before June 2016  
12 found 11 studies involving 621 patients.<sup>16</sup> Compared with controls, the use of the helmet was  
13 associated with lower hospital mortality, intubation rate, and complications.<sup>16</sup> Moreover,  
14 there was no significant difference in gas exchange and ICU stay.<sup>16</sup> A meta-analysis of four  
15 RCTs (377 patients) showed that helmet NIV significantly increased the ratio of arterial  
16 oxygen partial pressure to fraction of inspired oxygen ( $\text{PaO}_2/\text{FiO}_2$ ) and decreased arterial  
17 carbon dioxide levels, intubation rate and in-hospital mortality compared to standard oxygen  
18 therapy.<sup>17</sup> In a more recent systematic review and network meta-analysis that included 25  
19 studies (published up to April 2020) and 3804 patients with AHRF, mortality and intubation  
20 rate were lower with helmet NIV compared to standard oxygen by more than 50%, while the  
21 effect of mask NIV and high-flow nasal oxygen were modest compared to standard  
22 oxygen.<sup>18</sup> Helmet NIV was superior to both mask NIV and high-flow nasal oxygen, while  
23 mask NIV and high-flow nasal oxygen were not different in their effects on mortality and  
24 intubation rate.<sup>18</sup> One study reported the cost-effectiveness of helmet NIV compared to mask  
25 NIV.<sup>19</sup>  
26  
27  
28  
29  
30  
31  
32  
33  
34  
35  
36  
37  
38  
39  
40  
41  
42  
43  
44  
45  
46  
47  
48  
49  
50

51 Data on helmet NIV in AHRF related to COVID-19 are emerging. A recent RCT conducted in  
52 4 Italian ICUs on patients with COVID-19 and moderate to severe AHRF found that  
53 treatment with helmet NIV did not result in significantly fewer days of respiratory support at  
54 28 days from randomization (primary outcome) as compared with high-flow nasal oxygen  
55 alone (mean difference 2 days, 95% CI, -2 to 6,  $p=0.26$ ).<sup>20</sup> Nevertheless, the intubation rate  
56  
57  
58  
59  
60

1  
2  
3 was significantly lower in the helmet NIV group compared to the high-flow nasal oxygen  
4 group (30% vs 51%;  $p=0.03$ ).<sup>20</sup> Additionally, the median number of days free of invasive  
5 mechanical ventilation within 28 days was significantly higher in the helmet NIV group than  
6 in the high-flow nasal oxygen group (28 versus 25 days; mean difference, 3 days; 95% CI, 0-  
7 7;  $P = 0.04$ ).<sup>20</sup> The hospital mortality was 24% in the helmet NIV group and 25% in the high-  
8 flow nasal oxygen group.<sup>20</sup>

9  
10  
11  
12  
13  
14  
15  
16 As the efficacy of helmet NIV to improve outcomes in severe AHRF due to COVID-19  
17 pneumonia has not been clearly established, the aim of this study is to compare helmet NIV  
18 with usual care versus usual care alone to reduce 28-day all-cause mortality. We  
19 hypothesize that helmet NIV will reduce 28-day all-cause mortality in patients with suspected  
20 or confirmed severe COVID-19 pneumonia and AHRF.  
21  
22  
23  
24  
25  
26  
27  
28  
29

## 30 **Methods and analysis**

### 31 **Trial design**

32  
33  
34  
35 This is an investigator-initiated, pragmatic parallel RCT that will compare helmet NIV with  
36 usual care to usual care alone in 1:1 ratio in patients with suspected or confirmed COVID-19  
37 pneumonia and AHRF. Randomization is performed using a computer-generated schedule  
38 using variable block sizes (4 or 6) and is stratified by site. The trial is sponsored by King  
39 Abdullah International Medical Research Center, Riyadh, Saudi Arabia, has been registered  
40 with ClinicalTrials.gov (NCT04477668) and is conducted across multiple centers in Saudi  
41 Arabia. Training and in-service education on helmet NIV use as well as on protocol  
42 implementation are provided to all participating centers. The competency of the bedside  
43 respiratory therapists is supervised by experienced respiratory care supervisors and  
44 intensivists.  
45  
46  
47  
48  
49  
50  
51  
52  
53  
54  
55  
56  
57  
58  
59  
60

### Sample size

In a large observation study of patients with AHRF and ARDS, hospital mortality was 34.9% (95% CI, 31.4-38.5%) for patients with mild ARDS, 40.3% (95% CI, 37.4%-43.3%) for those with moderate ARDS, and 46.1% (95% CI, 41.9%-50.4%) for those with severe ARDS.<sup>21</sup> A systematic review found an overall pooled mortality estimate among 10,815 patients with ARDS due to COVID-19 to be 39% (95% CI: 23–56%).<sup>22</sup> Considering a mortality rate of 40% in patients with COVID-19 pneumonia and moderate to severe ARDS treated with usual care, we calculated that enrollment of 304 patients (152 in each group) would provide the study with 80% power to demonstrate an absolute difference of 15% in the primary outcome between the usual care group and helmet NIV group at a two-sided alpha level of 0.05. To account for 5% loss to follow-up, the total number of patients required for the trial is 320 patients.

### Participant eligibility

The trial will enroll ICU patients with suspected<sup>23</sup> or confirmed COVID-19 pneumonia who have AHRF. Detailed inclusion and exclusion criteria can be found in **Table 1**.

### Informed consent

Informed consent will be obtained from the potential trial participants or their surrogate decision makers. A hybrid model of consent will be used where a priori consent is obtained if possible, otherwise delayed consent model will be obtained as per local approvals. The first patient was enrolled in February 2021. As of June 29, 2021, a total of 199 patients were enrolled from 5 sites. There are several sites that are processing IRB and regulatory approvals.

## Patient and public involvement

There was no patient or public involvement in the conception, design or conduct of the study, or the writing or editing of this paper. However, patient comfort and experience as well as compliance to the intervention were taken in to consideration and data on these are collected.

## Trial interventions

### *Helmet group*

A helmet (Subsalve, USA or its equivalent), which is made of transparent latex-free polyvinyl chloride, will be applied to patients randomized to the intervention group as per the study protocol which considers the manufacturer instructions. It will be immediately connected to an ICU ventilator in pressure support (PS) mode with positive end-expiratory pressure (PEEP) using a conventional respiratory circuit joining two port sites to allow inspiratory and expiratory flow. The starting settings is PS of 8-10 cm H<sub>2</sub>O, PEEP of 10 cmH<sub>2</sub>O with FiO<sub>2</sub> of 100%, targeting flow rate of ≥50 L/min with an inspiratory rise time of 50 msec and end flow/cycling off of 50% of maximal inspiratory flow. PEEP may be increased by 2 cm every 3 minutes to achieve oxygen saturation (SpO<sub>2</sub>) ≥90% on FIO<sub>2</sub> ≤ 60%, and PS can be increased by 2 cm every 3 minutes to achieve respiratory rate ≤ 25/min and disappearance of accessory muscle activity. The maximal allowed PS + PEEP is 30 cm H<sub>2</sub>O. Interruptions of helmet should be avoided or kept at minimum at least in the first 48 hours.<sup>20</sup> More details of helmet NIV application, set up and weaning can be found in the **Supplementary File**. Some patients may not tolerate helmet NIV. In that case, the physician or the respiratory therapist explains the procedure to the patient. Dexmedetomidine infusion may be used to improve comfort with the helmet NIV. Other intravenous sedatives such as benzodiazepines or intravenous narcotics should generally not be used. If the patient continues to be intolerant to the helmet, the patient can be managed according to the usual care. Detailed data about helmet NIV tolerance are collected.

### **Control group**

In the control group, patients receive usual care according to the clinical practices of each site. This may include oxygen provided using standard oxygen devices, high-flow nasal oxygen or NIV provided by nasal mask, face mask or total mask.

### **Endotracheal Intubation**

The decision to intubate will be at the discretion of the treating team with no involvement from the research team. However, the protocol provides guidance on assessing patients for the need of endotracheal intubation throughout the study period (for both study groups: helmet NIV or usual care) according to the following general principles:

Enrolled patients should be assessed within 4 hours of enrollment (or sooner as required) and at frequent intervals for the following criteria, although the decision is usually not based on a single variable:

- Neurologic deterioration (*not attributed to sedation*)
- Persistent or worsening respiratory failure of NIV (manifesting as oxygen saturation <88%, respiratory rate >36/min, PaO<sub>2</sub>/FiO<sub>2</sub> ratio <100 or persistent requirement of FiO<sub>2</sub> ≥70%)
- Intolerance of face mask or helmet
- Airway bleeding
- Copious respiratory secretions
- Respiratory acidosis with pH <7.25
- Hemodynamic instability
- Significant radiologic worsening

### Co-Interventions

Patients who require endotracheal intubation are managed by the primary team with lung protective strategy with tidal volumes of 6 mL/kg of predicted body weight and titration of PEEP to achieve oxygen saturation of 88% to 95% at the lowest possible FiO<sub>2</sub>. Daily interruption of sedation, awakening and breathing trials, and early mobilization are performed as per the ICU standards.<sup>24</sup> Management of COVID-19 is provided as per local protocols; physicians are advised to follow the clinical practice guidelines set by the Saudi Critical Care Society,<sup>25</sup> the Surviving Sepsis Campaign,<sup>26 27</sup> and the World Health Organization.<sup>28</sup> The study protocol does not mandate particular therapies; however, corticosteroids, immune modulators and antiviral therapy are all recorded. Conservative fluid management is recommended where neutral balance should be targeted and intravenous resuscitation should be reserved for shock treatment in both groups and fluid balance is recorded.

### Blinding

Due to the nature of the study intervention, blinding is not be possible.

### Recruitment schedule and enrollment procedures

Schedule of assessments is detailed in **Table 2**. All non-intubated subjects with suspected or confirmed COVID-19 are screened upon admission to the ICU. A screening log will be kept to monitor and report the size of the patient population from which eligible patients have been randomized. Co-enrollment in other RCTs is permissible as long as inclusion in the other RCT would not confound the results of this trial and after discussion with the steering committees of the other studies.

## Data collection

Baseline data on demographics, admission diagnosis and clinical information are collected. Clinical information include Acute Physiology and Chronic Health Evaluation (APACHE) II score,<sup>29</sup> source of admission, ICU admission category (elective, emergency or non-surgical), ICU admission diagnosis and co-morbidities (as defined by the APACHE II severity of illness scoring system). Daily data will be recorded until discharge from ICU or 28 days after randomization. We will collect data on the use of helmet including the tolerance of helmet (>1-hour use).

## Outcomes

The primary outcome is 28-day all-cause mortality. Secondary outcomes are intubation rate within 28 days, ICU mortality, hospital mortality (censored at day 180), ICU-free days at day 28, invasive ventilation-free days at day 28, renal replacement therapy-free days at day 28 and vasopressor-free days at day 28. Safety outcomes include skin pressure injuries, barotrauma and serious adverse events (including cardiovascular events and device complications).

Additionally, there will be a follow up of enrolled patients at day 180 about vital status, functional status (EuroQoL (EQ)-5D-5L) which is planned to be reported separately. For patients who have been discharged from hospital before day 180, follow up will be conducted by telephone.

## Data analysis

A formal statistical analysis plan will be agreed upon and placed in the public domain before the study database is locked for the analysis of the primary outcome. The primary outcome



1  
2  
3 will be compared in the intention-to-treat and per-protocol cohorts (effectiveness analysis)  
4 using the chi-square test. Results will be reported as relative risk with 95% CI. Kaplan–Meier  
5 curves will be plotted to assess the time from enrollment to death and will be compared by  
6 means of the log-rank test. A two-tailed P value <0.05 will be considered to indicate  
7 statistical significance. SAS software, version 9.2 (SAS Institute) will be used for all the  
8 analyses.  
9  
10  
11  
12  
13  
14

15  
16 A priori analysis will be done for the following subgroups:  
17

- 18 I. Patients with moderate ARDS ( $\text{PaO}_2/\text{FIO}_2$  ratio 100-200) and patients with  
19 severe ARDS ( $\text{PaO}_2/\text{FIO}_2$  ratio <100)  
20  
21
- 22 II. Obese patients (body mass index >30  $\text{kg}/\text{m}^2$ ) and patients with body mass  
23 index  $\leq 30$   
24  
25
- 26 III. Patients aged >65 years and  $\leq 65$  years  
27  
28
- 29 IV. APACHE II score higher or lower than the median of enrolled patients  
30  
31

32 For the occasional randomized patient who is withdrawn from the trial and allows use of  
33 data, the patient's data will be included in the group to which he/she was allocated as per the  
34 intention-to-treat principle and the reason of withdrawal will be documented.  
35  
36  
37  
38  
39  
40

### 41 **Trial management and monitoring**

42

43  
44 The study Steering Committee members will be responsible for overseeing the conduct of  
45 the trial, for upholding or modifying study procedures as needed, addressing challenges with  
46 protocol implementation, formulating the analysis plan, reviewing and interpreting the data,  
47 and preparing the manuscript. This will be achieved through meetings (in-person or by  
48 conference calls) at least quarterly.  
49  
50  
51  
52  
53  
54

55  
56  
57 Several measures are taken to minimize, observe and document any potential safety  
58 concerns. First, any unexpected safety concerns will be reported immediately to the Steering  
59  
60

1  
2  
3 Committee and IRB. Second, an independent Data Safety Monitoring Board will be  
4  
5 monitoring the safety of the trial. Lastly, interim analyses will be conducted after recruiting  
6  
7 1/3 and 2/3 of the total patients and the interim test statistics will be the primary outcome  
8  
9 analysis for both safety and effectiveness. The Data Safety Monitoring Board will use formal  
10  
11 stopping rules based on the primary endpoint of 28-day mortality. The trial may be stopped  
12  
13 for safety ( $p < 0.01$ ) or effectiveness ( $p < 0.001$ ). There will be no plans to terminate the trial for  
14  
15 futility. We will account for alpha spending by the O'Brien Fleming method and the final  $p$   
16  
17 value will be considered at 0.048. The principles used in the conduct of safety monitoring  
18  
19 and reporting in this trial are those outlined by Cook et al.<sup>30</sup>  
20  
21  
22  
23  
24

25  
26 In this trial, reporting of serious adverse events will be restricted to events that are not  
27  
28 captured as study outcome and are considered to be related to the helmet NIV (possibly,  
29  
30 probably or definitely).<sup>30</sup> These may include cardiovascular events (i.e., cardiac arrest and  
31  
32 hypotension with drop in blood pressure to systolic  $< 90$  mm Hg) and device complications  
33  
34 (i.e., helmet deflation).  
35  
36  
37  
38

### 39 **Ethics and dissemination**

40  
41 The study will be conducted according to the principles of the latest version of Good Clinical  
42  
43 Practice (GCP) and in accordance with all relevant local ethical, regulatory, and legal  
44  
45 requirements. A manuscript with the results of the primary study will be published in a peer-  
46  
47 reviewed journal. Separate manuscripts will be written on secondary aims, and these will  
48  
49 also be submitted for publication in peer reviewed journals as well.  
50  
51

### 52 **Data availability**

53  
54  
55 Once all planned analyses have been completed and published or presented, data will be  
56  
57 shared upon reasonable request from the chief investigator.  
58  
59

### 60 **Discussion**

1  
2  
3 The importance of this study stems from the current pandemic situation as different  
4 treatment modalities are being sought to answer important clinical questions. Available  
5 literature on the evaluation of helmet NIV as a respiratory support modality in COVID-19  
6 patients is limited. Table 3 provides the list of ongoing RCTs on helmet NIV. This study aims  
7 to contribute to the existing literature and in turn influence clinical practice.  
8  
9  
10  
11  
12

13  
14 We planned our pragmatic trial to address whether using helmet NIV as the primary non-  
15 invasive respiratory support in patients with severe COVID-19, in addition to the commonly  
16 used high-flow nasal oxygen and mask NIV improves outcome. By nature of this question,  
17 there is heterogeneity of the control group; as patients in this group could receive standard  
18 oxygen, high-flow nasal oxygen or mask NIV at the decision of the treating team. This  
19 approach is supported by a recent network meta-analysis of randomized controlled trials that  
20 showed only a modest effect of high-flow nasal oxygen and mask NIV on mortality or  
21 intubation rate compared to standard oxygen, while patients treated with helmet NIV had  
22 more than 50% reduction in mortality and intubation rate compared to the other three  
23 modalities.<sup>18</sup> In addition, this approach is likely to be more representative of usual practice in  
24 which patients may get oxygen therapy, high-flow nasal oxygen and NIV at different times  
25 during their acute illness. Given the fact that the use of helmet NIV has not been widespread  
26 across ICUs, we thought that the broader question addressed by our study might be more  
27 relevant to deciding whether to introduce this modality or not in a given ICU.  
28  
29  
30  
31  
32  
33  
34  
35  
36  
37  
38  
39  
40  
41  
42  
43  
44  
45  
46

47 The main limitation to our study is inability to blind the given allocation due to the nature of  
48 the intervention.  
49  
50  
51  
52  
53  
54  
55  
56  
57  
58  
59  
60

## REFERENCES

1. World Health Organization. <https://covid19.who.int/> Accessed on March 29, 2021.
2. Marini J, Gattinoni L. Management of COVID-19 Respiratory Distress. *Jama* 2020
3. Guan W-j, Ni Z-y, Hu Y, et al. Clinical Characteristics of Coronavirus Disease 2019 in China. *New England Journal of Medicine* 2020;382(18):1708-20. doi: 10.1056/NEJMoa2002032
4. Ñamendys-Silva SA. Respiratory support for patients with COVID-19 infection. *The Lancet Respiratory medicine* 2020;8(4):e18.
5. Richardson S, Hirsch JS, Narasimhan M, et al. Presenting Characteristics, Comorbidities, and Outcomes Among 5700 Patients Hospitalized With COVID-19 in the New York City Area. *Jama*
6. Xu X, Zhang X, Hu S, et al. Noninvasive Ventilation in Acute Hypoxemic Nonhypercapnic Respiratory Failure: A Systematic Review and Meta-Analysis, 2017.
7. Brambilla AM, Aliberti S, Prina E, et al. Helmet CPAP vs. oxygen therapy in severe hypoxemic respiratory failure due to pneumonia. *Intensive Care Med* 2014;40(7):942-9. doi: 10.1007/s00134-014-3325-5 [published Online First: 2014/05/13]
8. Arulkumaran N, Brealey D, Howell D, et al. Use of non-invasive ventilation for patients with COVID-19: a cause for concern? *The Lancet Respiratory medicine* 2020 doi: 10.1016/S2213-2600(20)30181-8
9. Rodriguez AME, Papadakos PJ, Carron M, et al. Clinical review: Helmet and non-invasive mechanical ventilation in critically ill patients. *Critical Care* 2013;17(2):223.
10. Patroniti N, Foti G, Manfio A, et al. Head helmet versus face mask for non-invasive continuous positive airway pressure: a physiological study. *Intensive care medicine* 2003;29(10):1680.
11. Cosentini R, Brambilla AM, Aliberti S, et al. Helmet continuous positive airway pressure vs oxygen therapy to improve oxygenation in community-acquired pneumonia: a randomized, controlled trial. *Chest* 2010;138(1):114-20. doi: 10.1378/chest.09-2290 [published Online First: 2010/02/16]
12. Patel BK, Wolfe KS, Pohlman AS, et al. Effect of Noninvasive Ventilation Delivered by Helmet vs Face Mask on the Rate of Endotracheal Intubation in Patients With Acute Respiratory Distress Syndrome: A Randomized Clinical Trial. *JAMA* 2016;315(22):2435.
13. Foti G, Sangalli F, Berra L, et al. Is helmet CPAP first line pre-hospital treatment of presumed severe acute pulmonary edema? *Intensive care medicine* 2009;35(4):656.
14. Squadrone V, Cocha M, Cerutti E, et al. Continuous positive airway pressure for treatment of postoperative hypoxemia: a randomized controlled trial. *Jama* 2005;293(5):589.

- 1  
2  
3 15. Patel BK, Wolfe KS, MacKenzie E, et al. One Year Outcomes in Patients with Acute  
4 Respiratory Distress Syndrome Enrolled in a Randomized Clinical Trial of Helmet  
5 versus Facemask Noninvasive Ventilation. *Critical care medicine* 2018;46(7):1078.  
6  
7
- 8 16. Liu Q, Gao Y, Chen R, et al. Noninvasive ventilation with helmet versus control strategy  
9 in patients with acute respiratory failure: a systematic review and meta-analysis of  
10 controlled studies. *Critical Care* 2016;20(1)  
11
- 12 17. Luo Y, Luo Y, Li Y, et al. Helmet CPAP versus Oxygen Therapy in Hypoxemic Acute  
13 Respiratory Failure: A Meta-Analysis of Randomized Controlled Trials, 2016.  
14
- 15 18. Ferreyro BL, Angriman F, Munshi L, et al. Association of Noninvasive Oxygenation  
16 Strategies With All-Cause Mortality in Adults With Acute Hypoxemic Respiratory  
17 Failure: A Systematic Review and Meta-analysis. *Jama* 2020;324(1):57-67. doi:  
18 10.1001/jama.2020.9524  
19
- 20 19. Kyeremanteng K, Gagnon LP, Robidoux R, et al. Cost Analysis of Noninvasive Helmet  
21 Ventilation Compared with Use of Noninvasive Face Mask in ARDS. *Can Respir J*  
22 2018;2018:6518572. doi: 10.1155/2018/6518572 [published Online First: 2018/04/20]  
23
- 24 20. Grieco DL, Menga LS, Cesarano M, et al. Effect of Helmet Noninvasive Ventilation vs  
25 High-Flow Nasal Oxygen on Days Free of Respiratory Support in Patients With  
26 COVID-19 and Moderate to Severe Hypoxemic Respiratory Failure: The HENIVOT  
27 Randomized Clinical Trial. *Jama* 2021 doi: 10.1001/jama.2021.4682  
28
- 29 21. Bellani G, Laffey J, Pham T, et al. Epidemiology, Patterns of Care, and Mortality for  
30 Patients With Acute Respiratory Distress Syndrome in Intensive Care Units in 50  
31 Countries. *Jama* 2016;315(8):788.  
32
- 33 22. Hasan SS, Capstick T, Ahmed R, et al. Mortality in COVID-19 patients with acute  
34 respiratory distress syndrome and corticosteroids use: a systematic review and meta-  
35 analysis. *Expert Rev Respir Med* 2020;14(11):1149-63. doi:  
36 10.1080/17476348.2020.1804365 [published Online First: 2020/08/01]  
37
- 38 23. Centers for Disease Control and Prevention. Coronavirus Disease 2019 (COVID-19).  
39 2020 Interim Case Definition, Approved April 5, 2020.  
40 [https://wwwn.cdc.gov/nndss/conditions/coronavirus-disease-2019-covid-19/case-  
41 definition/2020/](https://wwwn.cdc.gov/nndss/conditions/coronavirus-disease-2019-covid-19/case-definition/2020/). Accessed on June 2, 2020.  
42
- 43 24. Arabi Y, Al Aseri Z, Alaama T, et al. National Approach to Standardize and Improve  
44 Mechanical Ventilation. *Annals of thoracic medicine* 2019;14(2):101.  
45
- 46 25. Alhazzani W, Al-Suwaidan F, Al Aseri Z, et al. The saudi critical care society clinical  
47 practice guidelines on the management of COVID-19 patients in the intensive care  
48 unit. *Saudi Critical Care Journal* 2020;4(2):27-44. doi: 10.4103/sccj.sccj\_15\_20  
49
- 50 26. Alhazzani W, Evans L, Alshamsi F, et al. Surviving Sepsis Campaign Guidelines on the  
51 Management of Adults With Coronavirus Disease 2019 (COVID-19) in the ICU: First  
52  
53  
54  
55  
56  
57  
58  
59  
60

- 1  
2  
3 Update. *Critical Care Medicine* 2021;49(3):e219-e34. doi:  
4 10.1097/ccm.0000000000004899  
5  
6 27. Alhazzani W, Møller MH, Arabi YM, et al. Surviving Sepsis Campaign: Guidelines on the  
7 Management of Critically Ill Adults with Coronavirus Disease 2019 (COVID-19).  
8 *Critical Care Medicine* 2020;48(6):e440-e69. doi: 10.1097/ccm.0000000000004363  
9  
10 28. Coronavirus disease (COVID-19) technical guidance: Patient management.  
11 [https://www.who.int/emergencies/diseases/novel-coronavirus-2019/technical-](https://www.who.int/emergencies/diseases/novel-coronavirus-2019/technical-guidance/patient-management)  
12 [guidance/patient-management](https://www.who.int/emergencies/diseases/novel-coronavirus-2019/technical-guidance/patient-management). Accessed 1 March 2021.  
13  
14 29. Knaus WA, Draper EA, Wagner DP, et al. APACHE II: a severity of disease classification  
15 system. *Crit Care Med* 1985;13(10):818-29. [published Online First: 1985/10/01]  
16  
17 30. Cook D, Lauzier F, Rocha MG, et al. Serious adverse events in academic critical care  
18 research. *CMAJ : Canadian Medical Association journal = journal de l'Association*  
19 *medicale canadienne* 2008;178(9):1181-84.  
20  
21  
22  
23  
24  
25  
26  
27  
28  
29  
30  
31  
32  
33  
34  
35  
36  
37  
38  
39  
40  
41  
42  
43  
44  
45  
46  
47  
48  
49  
50  
51  
52  
53  
54  
55  
56  
57  
58  
59  
60

## Acknowledgements

The authors would like to thank all the participating patients and their families, as well as the members of the Data Safety & Monitoring Board: Chair: Dr. Nicholas S. Hill (Professor of Medicine, Chief of Pulmonary, Critical Care and Sleep Division, Tufts Medical Center, Boston, Massachusetts, USA), DSM members: Dr. Stefano Nava (Professor of Respiratory Medicine University of Bologna, Chief of the Respiratory and Critical Care Sant' Orsola Hospital Bologna, Specialist in Respiratory Medicine and Intensive Care Medicine, University of Bologna, Italy), Dr. James Mojica (Vice Chief and Clinical Director of Pulmonary & Critical Care, Director, The Sleep Center at Spaulding, Massachusetts General Hospital, USA) and Dr. Michael Harhay (Assistant Professor of Epidemiology and Medicine-Pulmonary and Critical Care, Department of Biostatistics, Epidemiology and Informatics, University of Pennsylvania USA).

**Contributors** YA is the principal investigator and participated in the project concept, design, final approval, and manuscript preparation, review and submission. HT, SD, HD, SA, MH, HH, MM, OZ, EQ, WW, SQ, FH, JC, MS, AH, AM, AE, AB, ZA ZD, AK, RQ, AG, AT, KG, MA, HG, AA, FB, HS, MO, YI, AF participated in the critical revision, final approval of the protocol and manuscript preparation, review and submission. All authors agree to be accountable for the accuracy and integrity of the work.

**Funding** The study is funded by King Abdullah International Medical Research Center (RC 20/306/R). The study sponsor does not have any role in the study design, collection, management, analysis, and interpretation of data as well as writing of the report.

**Competing interests** None declared

## Ethics approval

The study has been approved by the Institutional Review Board (IRB) of Ministry of National Guard Health Affairs (MNGHA) and the respective Institutional Review Boards of all the other centers.

**Patient consent for publication** Not required.

**Provenance and peer review** Not commissioned, externally peer reviewed.

**Table 1.** Eligibility Criteria

|                           |                                                                                                                                                                                                                                                                                                                                                                                                                                                                                                                                                                                                                                                                                    |
|---------------------------|------------------------------------------------------------------------------------------------------------------------------------------------------------------------------------------------------------------------------------------------------------------------------------------------------------------------------------------------------------------------------------------------------------------------------------------------------------------------------------------------------------------------------------------------------------------------------------------------------------------------------------------------------------------------------------|
| <b>Inclusion Criteria</b> | <ol style="list-style-type: none"> <li>1. Suspected or confirmed COVID-19*</li> <li>2. Aged <math>\geq</math> 14 years old. ICUs that use other age cut-off for adult patients will adhere to their local standard (16 or 18 years)</li> <li>3. Acute hypoxemic respiratory failure based on PaO<sub>2</sub>/FiO<sub>2</sub> ratio &lt; 200 despite supplemental oxygen with a partial or non-rebreathing mask at a flow rate &gt;10 L/min or above</li> <li>4. Able to follow instructions</li> </ol>                                                                                                                                                                             |
| <b>Exclusion Criteria</b> | <ol style="list-style-type: none"> <li>1. Prior intubation during this hospital admission</li> <li>2. Cardiopulmonary arrest</li> <li>3. Glasgow coma scale &lt;12</li> <li>4. Tracheostomy</li> <li>5. Upper airway obstruction</li> <li>6. Active epistaxis</li> <li>7. Requirement for more than one vasopressor to maintain mean arterial pressure &gt;65 mm Hg.</li> <li>8. Pregnancy</li> <li>9. Imminent intubation</li> <li>10. Patients with do-not-intubate orders (or equivalent)</li> <li>11. Enrolled in another trial for which co-enrolment is not approved including trials on mechanical ventilation</li> <li>12. Patients already treated with helmet</li> </ol> |



|                                |                                                                                                                                                                                   |
|--------------------------------|-----------------------------------------------------------------------------------------------------------------------------------------------------------------------------------|
|                                | 13. Patients with chronic carbon dioxide retention (PaCO <sub>2</sub> >45)                                                                                                        |
| <b>Eligible non-randomized</b> | <ol style="list-style-type: none"> <li>1. Patient or substitute decision-maker declines consent</li> <li>2. ICU physician or other treating clinician declines consent</li> </ol> |

\*A suspected/probable COVID-19 case is defined as: At least two of the following symptoms: fever (measured or subjective), chills, rigors, myalgia, headache, sore throat, new olfactory and taste disorder(s) **OR** at least one of the following symptoms: cough, shortness of breath, or difficulty breathing **OR** severe respiratory illness with at least one of the following: Clinical or radiographic evidence of pneumonia, **OR** ARDS **AND** no alternative more likely diagnosis. A confirmed COVID-19 case is defined as: Detection of SARS-CoV-2 RNA in a respiratory specimen using a molecular amplification detection test such as rt-PCR (<https://www.cdc.gov/nndss/conditions/coronavirus-disease-2019-covid-19/case-definition/2020/>).

**Table 2.** Schedule of assessments in the trial

| <b>Task</b>                                | <b>Screening</b> | <b>Randomization</b> | <b>Baseline</b> | <b>Day 1-28</b> | <b>180-Day Follow up</b> |
|--------------------------------------------|------------------|----------------------|-----------------|-----------------|--------------------------|
| Assess eligibility to enter study          | X                |                      |                 |                 |                          |
| Assess ability to gain consent & follow-up | X                |                      |                 |                 |                          |
| Consent                                    | X                |                      |                 |                 |                          |
| Demographics and eligibility checklist     | X                | X                    | X               |                 |                          |
| Laboratory data                            |                  |                      | X               | X               |                          |
| Vital signs                                |                  |                      | X               | X               |                          |
| Vital status up to Day 28 in the ICU       |                  |                      |                 | X               | X                        |
| Vital and functional status                |                  |                      |                 |                 | X                        |
| Discharge date from ICU, from hospital     |                  |                      |                 | X               | X                        |
| Adverse events                             |                  |                      |                 | X               |                          |
| Protocol violations                        |                  |                      |                 | X               |                          |

For peer review only

**Table 3.** List of ongoing registered randomized controlled trials (RCTs) on helmet noninvasive ventilation

| <b>Trial</b>                                                                                               | <b>Registration</b> | <b>Interventions</b>                               | <b>Design</b>     | <b>Countries</b> | <b>N</b> |
|------------------------------------------------------------------------------------------------------------|---------------------|----------------------------------------------------|-------------------|------------------|----------|
| Helmet non-invasive ventilation for COVID-19 patients (Helmet-COVID)                                       | NCT04477668         | Helmet vs. usual care                              | Multicenter RCT   | Saudi Arabia     | 320      |
| Comparison of high-flow nasal oxygen, face-mask NIV and helmet NIV in COVID-19 ARDS patients (NIV COVID19) | NCT04715243         | High-flow nasal oxygen vs. helmet NIV vs. mask NIV | Multicenter RCT   | Oman             | 360      |
| Helmet CPAP vs. high-flow nasal oxygen in COVID-19 (COVID HELMET)                                          | NCT04395807         | High-flow nasal oxygen vs. helmet CPAP             | Single-center RCT | Sweden           | 120      |
| High-flow nasal oxygen vs. CPAP Helmet in COVID-19 pneumonia (COVIDNOCHE)                                  | NCT04381923         | High-flow nasal oxygen vs. helmet CPAP             | Single-center RCT | USA              | 200      |
| Early CPAP in COVID-19 patients with respiratory failure (EC-COVID-RCT)                                    | NCT04326075         | Early helmet CPAP vs. usual care                   | Single-center RCT | Italy            | 900      |

## Helmet-NIV Protocol

### Setup and preparation

- Use unheated, low-compliance, dual limb breathing circuit.
- Insert a bacterial/viral filter at the expiratory port of the ventilator.
- Carry out the required preoperational check.
- To avoid patient-ventilator asynchrony, explain the application and the procedure of the helmet to the patient.
- Insert the earplugs into patient ears.
- Use the under-arm pads to avoid strap pressure.

### Initial setup

- Can be used with a ventilator or NIV machines.
- Set up the ventilator on Pressure Support Ventilation (PSV).
- PSV 8-10 cm H<sub>2</sub>O pressure, positive end-expiratory pressure (PEEP) 10 cm H<sub>2</sub>O pressure, FiO<sub>2</sub> 100%.
- Flow rate >50 L/min, inspiratory rise time 50 msec, End Flow/Cycling off 50% of maximal inspiratory flow.

### Titration

- Increase PEEP by 2 cm H<sub>2</sub>O every 3 minutes to achieve SpO<sub>2</sub> ≥ 92% on FiO<sub>2</sub> ≤ 60%
- Higher PEEP than what is used on face mask NIV is allowed and tolerated.
- Increase PS by 2 cm every 3 minutes to achieve respiratory rate (RR) ≤ 25/min or clear patient comfort.
- The maximal allowed PS + PEEP is 30 cm H<sub>2</sub>O.
- Helmet interruptions should be avoided or kept at minimum at least for the first 48 hours.
- Titrate FiO<sub>2</sub> to ≤60% as soon as possible.

### Sedation

- Dexmedetomidine may be used to improve compliance with the helmet. Other intravenous sedatives such as benzodiazepines or intravenous narcotics should not be used.

### Weaning when clinical condition allows

- Titrate PS by 2 cm H<sub>2</sub>O every 3 hours if RR ≤ 25/min.
- Titrate PEEP by 2 cm H<sub>2</sub>O every 3 hours if SpO<sub>2</sub> >92% on <60% FiO<sub>2</sub>.
- If RR ≤25/min on PSV ≤8 cm and SpO<sub>2</sub> >92% on FiO<sub>2</sub> ≤50% and PEEP ≤8 cm H<sub>2</sub>O, the helmet can be discontinued and patient switched to high-flow nasal cannula, or oxygen supply at O<sub>2</sub> at 6L/min or higher.
- Helmet NIV could be resumed at any time if the respiratory rate was greater than 25 breaths/min and/or SpO<sub>2</sub> was lower than 92% on FiO<sub>2</sub> of ≥60%.

### Nursing Care

- Perform oral care/suction before helmet application.
- Nutrition can be provided through a straw. Place a nasogastric tube before helmet application if felt necessary by treating physician (not commonly needed).
- A suction Yankauer for suctioning and a straw for drinking can be introduced through the patient port without removing the helmet.
- Intravenous sedation (Dexmedetomidine or others) can be used at the discretion of the treating physician to assure patient comfort.

**Equipment required**

- Mechanical ventilator (BP 840, PB 980, Servo-I, Drager V 500, Astral and V680)
- Unheated double lumen circuit
- Bacterial/viral filter
- Subsalve helmet or equivalent
- Under arm pads
- Ear plugs

**General recommendations to consider intubation for patients on NIV (assessed within 4 hours and at frequent intervals throughout NIV treatment):**

- Neurologic deterioration (not attributed to sedation)
- Persistent or worsening respiratory failure of NIV:
  - o oxygen saturation <88%
  - o respiratory rate >36/min
  - o P/F ratio <100
  - o a persistent requirement of FiO<sub>2</sub> ≥70%
- Intolerance of face mask or helmet
- Airway bleeding
- Copious respiratory secretions
- Respiratory acidosis with pH <7.25
- Hemodynamic instability
- Significant radiologic worsening

**Humidification**

Appropriate level of humidification can be achieved via bubble humidifier with external oxygen flow of 5 L/min entrained into the ventilator circuit proximal to the patient helmet.

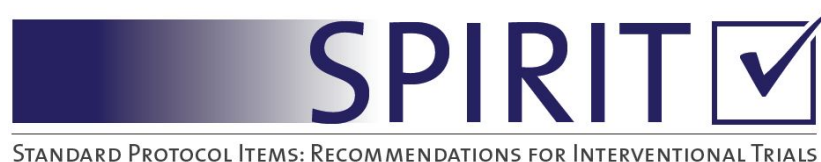

STANDARD PROTOCOL ITEMS: RECOMMENDATIONS FOR INTERVENTIONAL TRIALS

SPIRIT 2013 Checklist: Recommended items to address in a clinical trial protocol and related documents\*

| Section/item                      | Item No | Description                                                                                                                                                                                                                                                                              | Addressed on page number |
|-----------------------------------|---------|------------------------------------------------------------------------------------------------------------------------------------------------------------------------------------------------------------------------------------------------------------------------------------------|--------------------------|
| <b>Administrative information</b> |         |                                                                                                                                                                                                                                                                                          |                          |
| Title                             | 1       | Descriptive title identifying the study design, population, interventions, and, if applicable, trial acronym                                                                                                                                                                             | 1                        |
| Trial registration                | 2a      | Trial identifier and registry name. If not yet registered, name of intended registry                                                                                                                                                                                                     | 6                        |
|                                   | 2b      | All items from the World Health Organization Trial Registration Data Set                                                                                                                                                                                                                 | 6                        |
| Protocol version                  | 3       | Date and version identifier                                                                                                                                                                                                                                                              | 6                        |
| Funding                           | 4       | Sources and types of financial, material, and other support                                                                                                                                                                                                                              | 24                       |
| Roles and responsibilities        | 5a      | Names, affiliations, and roles of protocol contributors                                                                                                                                                                                                                                  | 24                       |
|                                   | 5b      | Name and contact information for the trial sponsor                                                                                                                                                                                                                                       | 24                       |
|                                   | 5c      | Role of study sponsor and funders, if any, in study design; collection, management, analysis, and interpretation of data; writing of the report; and the decision to submit the report for publication, including whether they will have ultimate authority over any of these activities | 24                       |
|                                   | 5d      | Composition, roles, and responsibilities of the coordinating centre, steering committee, endpoint adjudication committee, data management team, and other individuals or groups overseeing the trial, if applicable (see Item 21a for data monitoring committee)                         | 24                       |

1 **Introduction**

|    |                                                           |     |                                                                                                               |
|----|-----------------------------------------------------------|-----|---------------------------------------------------------------------------------------------------------------|
| 2  |                                                           |     |                                                                                                               |
| 3  | Background and                                            | 6a  | Description of research question and justification for undertaking the trial, including summary of relevant   |
| 4  | rationale                                                 |     | studies (published and unpublished) examining benefits and harms for each intervention                        |
| 5  |                                                           |     | 8-12                                                                                                          |
| 6  |                                                           | 6b  | Explanation for choice of comparators                                                                         |
| 7  |                                                           |     | 8-12                                                                                                          |
| 8  | Objectives                                                | 7   | Specific objectives or hypotheses                                                                             |
| 9  |                                                           |     | 8-12                                                                                                          |
| 10 | Trial design                                              | 8   | Description of trial design including type of trial (eg, parallel group, crossover, factorial, single group), |
| 11 |                                                           |     | allocation ratio, and framework (eg, superiority, equivalence, noninferiority, exploratory)                   |
| 12 |                                                           |     | 8-12                                                                                                          |
| 13 |                                                           |     |                                                                                                               |
| 14 | <b>Methods: Participants, interventions, and outcomes</b> |     |                                                                                                               |
| 15 |                                                           |     |                                                                                                               |
| 16 | Study setting                                             | 9   | Description of study settings (eg, community clinic, academic hospital) and list of countries where data will |
| 17 |                                                           |     | be collected. Reference to where list of study sites can be obtained                                          |
| 18 |                                                           |     | 8-12                                                                                                          |
| 19 | Eligibility criteria                                      | 10  | Inclusion and exclusion criteria for participants. If applicable, eligibility criteria for study centres and  |
| 20 |                                                           |     | individuals who will perform the interventions (eg, surgeons, psychotherapists)                               |
| 21 |                                                           |     | 8-12                                                                                                          |
| 22 | Interventions                                             | 11a | Interventions for each group with sufficient detail to allow replication, including how and when they will be |
| 23 |                                                           |     | administered                                                                                                  |
| 24 |                                                           |     | 8-12                                                                                                          |
| 25 |                                                           | 11b | Criteria for discontinuing or modifying allocated interventions for a given trial participant (eg, drug dose  |
| 26 |                                                           |     | change in response to harms, participant request, or improving/worsening disease)                             |
| 27 |                                                           |     | 13                                                                                                            |
| 28 |                                                           | 11c | Strategies to improve adherence to intervention protocols, and any procedures for monitoring adherence        |
| 29 |                                                           |     | (eg, drug tablet return, laboratory tests)                                                                    |
| 30 |                                                           |     | 14, 16                                                                                                        |
| 31 |                                                           | 11d | Relevant concomitant care and interventions that are permitted or prohibited during the trial                 |
| 32 |                                                           |     | 13-14                                                                                                         |
| 33 | Outcomes                                                  | 12  | Primary, secondary, and other outcomes, including the specific measurement variable (eg, systolic blood       |
| 34 |                                                           |     | pressure), analysis metric (eg, change from baseline, final value, time to event), method of aggregation (eg, |
| 35 |                                                           |     | median, proportion), and time point for each outcome. Explanation of the clinical relevance of chosen         |
| 36 |                                                           |     | efficacy and harm outcomes is strongly recommended                                                            |
| 37 |                                                           |     | 15                                                                                                            |
| 38 | Participant timeline                                      | 13  | Time schedule of enrolment, interventions (including any run-ins and washouts), assessments, and visits for   |
| 39 |                                                           |     | participants. A schematic diagram is highly recommended (see Figure)                                          |
| 40 |                                                           |     | 14                                                                                                            |
| 41 |                                                           |     |                                                                                                               |
| 42 |                                                           |     |                                                                                                               |
| 43 |                                                           |     |                                                                                                               |
| 44 |                                                           |     |                                                                                                               |
| 45 |                                                           |     |                                                                                                               |
| 46 |                                                           |     |                                                                                                               |

|    |                                                                     |     |                                                                                                                                                                                                                                                                                                                                                                                                              |              |
|----|---------------------------------------------------------------------|-----|--------------------------------------------------------------------------------------------------------------------------------------------------------------------------------------------------------------------------------------------------------------------------------------------------------------------------------------------------------------------------------------------------------------|--------------|
| 1  | Sample size                                                         | 14  | Estimated number of participants needed to achieve study objectives and how it was determined, including clinical and statistical assumptions supporting any sample size calculations                                                                                                                                                                                                                        | <u>11</u>    |
| 2  |                                                                     |     |                                                                                                                                                                                                                                                                                                                                                                                                              |              |
| 3  |                                                                     |     |                                                                                                                                                                                                                                                                                                                                                                                                              |              |
| 4  | Recruitment                                                         | 15  | Strategies for achieving adequate participant enrolment to reach target sample size                                                                                                                                                                                                                                                                                                                          | <u>16-17</u> |
| 5  |                                                                     |     |                                                                                                                                                                                                                                                                                                                                                                                                              |              |
| 6  |                                                                     |     |                                                                                                                                                                                                                                                                                                                                                                                                              |              |
| 7  | <b>Methods: Assignment of interventions (for controlled trials)</b> |     |                                                                                                                                                                                                                                                                                                                                                                                                              |              |
| 8  | Allocation:                                                         |     |                                                                                                                                                                                                                                                                                                                                                                                                              |              |
| 9  |                                                                     |     |                                                                                                                                                                                                                                                                                                                                                                                                              |              |
| 10 | Sequence                                                            | 16a | Method of generating the allocation sequence (eg, computer-generated random numbers), and list of any factors for stratification. To reduce predictability of a random sequence, details of any planned restriction (eg, blocking) should be provided in a separate document that is unavailable to those who enrol participants or assign interventions                                                     | <u>11</u>    |
| 11 | generation                                                          |     |                                                                                                                                                                                                                                                                                                                                                                                                              |              |
| 12 |                                                                     |     |                                                                                                                                                                                                                                                                                                                                                                                                              |              |
| 13 |                                                                     |     |                                                                                                                                                                                                                                                                                                                                                                                                              |              |
| 14 |                                                                     |     |                                                                                                                                                                                                                                                                                                                                                                                                              |              |
| 15 |                                                                     |     |                                                                                                                                                                                                                                                                                                                                                                                                              |              |
| 16 | Allocation                                                          | 16b | Mechanism of implementing the allocation sequence (eg, central telephone; sequentially numbered, opaque, sealed envelopes), describing any steps to conceal the sequence until interventions are assigned                                                                                                                                                                                                    | <u>11</u>    |
| 17 | concealment                                                         |     |                                                                                                                                                                                                                                                                                                                                                                                                              |              |
| 18 | mechanism                                                           |     |                                                                                                                                                                                                                                                                                                                                                                                                              |              |
| 19 |                                                                     |     |                                                                                                                                                                                                                                                                                                                                                                                                              |              |
| 20 |                                                                     |     |                                                                                                                                                                                                                                                                                                                                                                                                              |              |
| 21 | Implementation                                                      | 16c | Who will generate the allocation sequence, who will enrol participants, and who will assign participants to interventions                                                                                                                                                                                                                                                                                    | <u>11</u>    |
| 22 |                                                                     |     |                                                                                                                                                                                                                                                                                                                                                                                                              |              |
| 23 |                                                                     |     |                                                                                                                                                                                                                                                                                                                                                                                                              |              |
| 24 | Blinding (masking)                                                  | 17a | Who will be blinded after assignment to interventions (eg, trial participants, care providers, outcome assessors, data analysts), and how                                                                                                                                                                                                                                                                    | <u>14</u>    |
| 25 |                                                                     |     |                                                                                                                                                                                                                                                                                                                                                                                                              |              |
| 26 |                                                                     |     |                                                                                                                                                                                                                                                                                                                                                                                                              |              |
| 27 |                                                                     | 17b | If blinded, circumstances under which unblinding is permissible, and procedure for revealing a participant's allocated intervention during the trial                                                                                                                                                                                                                                                         | <u>14</u>    |
| 28 |                                                                     |     |                                                                                                                                                                                                                                                                                                                                                                                                              |              |
| 29 |                                                                     |     |                                                                                                                                                                                                                                                                                                                                                                                                              |              |
| 30 |                                                                     |     |                                                                                                                                                                                                                                                                                                                                                                                                              |              |
| 31 | <b>Methods: Data collection, management, and analysis</b>           |     |                                                                                                                                                                                                                                                                                                                                                                                                              |              |
| 32 |                                                                     |     |                                                                                                                                                                                                                                                                                                                                                                                                              |              |
| 33 | Data collection                                                     | 18a | Plans for assessment and collection of outcome, baseline, and other trial data, including any related processes to promote data quality (eg, duplicate measurements, training of assessors) and a description of study instruments (eg, questionnaires, laboratory tests) along with their reliability and validity, if known. Reference to where data collection forms can be found, if not in the protocol | <u>14-15</u> |
| 34 | methods                                                             |     |                                                                                                                                                                                                                                                                                                                                                                                                              |              |
| 35 |                                                                     |     |                                                                                                                                                                                                                                                                                                                                                                                                              |              |
| 36 |                                                                     |     |                                                                                                                                                                                                                                                                                                                                                                                                              |              |
| 37 |                                                                     |     |                                                                                                                                                                                                                                                                                                                                                                                                              |              |
| 38 |                                                                     |     |                                                                                                                                                                                                                                                                                                                                                                                                              |              |
| 39 |                                                                     | 18b | Plans to promote participant retention and complete follow-up, including list of any outcome data to be collected for participants who discontinue or deviate from intervention protocols                                                                                                                                                                                                                    | <u>14-15</u> |
| 40 |                                                                     |     |                                                                                                                                                                                                                                                                                                                                                                                                              |              |
| 41 |                                                                     |     |                                                                                                                                                                                                                                                                                                                                                                                                              |              |
| 42 |                                                                     |     |                                                                                                                                                                                                                                                                                                                                                                                                              |              |
| 43 |                                                                     |     |                                                                                                                                                                                                                                                                                                                                                                                                              |              |
| 44 |                                                                     |     |                                                                                                                                                                                                                                                                                                                                                                                                              |              |
| 45 |                                                                     |     |                                                                                                                                                                                                                                                                                                                                                                                                              |              |
| 46 |                                                                     |     |                                                                                                                                                                                                                                                                                                                                                                                                              |              |



|    |                                 |     |                                                                                                                                                                                                                                                                                                                                       |                       |
|----|---------------------------------|-----|---------------------------------------------------------------------------------------------------------------------------------------------------------------------------------------------------------------------------------------------------------------------------------------------------------------------------------------|-----------------------|
| 1  | Data management                 | 19  | Plans for data entry, coding, security, and storage, including any related processes to promote data quality (eg, double data entry; range checks for data values). Reference to where details of data management procedures can be found, if not in the protocol                                                                     | <u>14-17</u>          |
| 2  |                                 |     |                                                                                                                                                                                                                                                                                                                                       |                       |
| 3  |                                 |     |                                                                                                                                                                                                                                                                                                                                       |                       |
| 4  |                                 |     |                                                                                                                                                                                                                                                                                                                                       |                       |
| 5  | Statistical methods             | 20a | Statistical methods for analysing primary and secondary outcomes. Reference to where other details of the statistical analysis plan can be found, if not in the protocol                                                                                                                                                              | <u>15-16</u>          |
| 6  |                                 |     |                                                                                                                                                                                                                                                                                                                                       |                       |
| 7  |                                 |     |                                                                                                                                                                                                                                                                                                                                       |                       |
| 8  |                                 | 20b | Methods for any additional analyses (eg, subgroup and adjusted analyses)                                                                                                                                                                                                                                                              | <u>15-16</u>          |
| 9  |                                 |     |                                                                                                                                                                                                                                                                                                                                       |                       |
| 10 |                                 | 20c | Definition of analysis population relating to protocol non-adherence (eg, as randomised analysis), and any statistical methods to handle missing data (eg, multiple imputation)                                                                                                                                                       | <u>15-16</u>          |
| 11 |                                 |     |                                                                                                                                                                                                                                                                                                                                       |                       |
| 12 |                                 |     |                                                                                                                                                                                                                                                                                                                                       |                       |
| 13 |                                 |     |                                                                                                                                                                                                                                                                                                                                       |                       |
| 14 | <b>Methods: Monitoring</b>      |     |                                                                                                                                                                                                                                                                                                                                       |                       |
| 15 |                                 |     |                                                                                                                                                                                                                                                                                                                                       |                       |
| 16 | Data monitoring                 | 21a | Composition of data monitoring committee (DMC); summary of its role and reporting structure; statement of whether it is independent from the sponsor and competing interests; and reference to where further details about its charter can be found, if not in the protocol. Alternatively, an explanation of why a DMC is not needed | <u>16-17</u>          |
| 17 |                                 |     |                                                                                                                                                                                                                                                                                                                                       |                       |
| 18 |                                 | 21b | Description of any interim analyses and stopping guidelines, including who will have access to these interim results and make the final decision to terminate the trial                                                                                                                                                               | <u>16-17</u>          |
| 19 |                                 |     |                                                                                                                                                                                                                                                                                                                                       |                       |
| 20 |                                 |     |                                                                                                                                                                                                                                                                                                                                       |                       |
| 21 |                                 |     |                                                                                                                                                                                                                                                                                                                                       |                       |
| 22 |                                 |     |                                                                                                                                                                                                                                                                                                                                       |                       |
| 23 |                                 |     |                                                                                                                                                                                                                                                                                                                                       |                       |
| 24 |                                 |     |                                                                                                                                                                                                                                                                                                                                       |                       |
| 25 | Harms                           | 22  | Plans for collecting, assessing, reporting, and managing solicited and spontaneously reported adverse events and other unintended effects of trial interventions or trial conduct                                                                                                                                                     | <u>16-17</u>          |
| 26 |                                 |     |                                                                                                                                                                                                                                                                                                                                       |                       |
| 27 |                                 |     |                                                                                                                                                                                                                                                                                                                                       |                       |
| 28 | Auditing                        | 23  | Frequency and procedures for auditing trial conduct, if any, and whether the process will be independent from investigators and the sponsor                                                                                                                                                                                           | <u>Not applicable</u> |
| 29 |                                 |     |                                                                                                                                                                                                                                                                                                                                       |                       |
| 30 |                                 |     |                                                                                                                                                                                                                                                                                                                                       |                       |
| 31 |                                 |     |                                                                                                                                                                                                                                                                                                                                       |                       |
| 32 | <b>Ethics and dissemination</b> |     |                                                                                                                                                                                                                                                                                                                                       |                       |
| 33 |                                 |     |                                                                                                                                                                                                                                                                                                                                       |                       |
| 34 | Research ethics approval        | 24  | Plans for seeking research ethics committee/institutional review board (REC/IRB) approval                                                                                                                                                                                                                                             | <u>17</u>             |
| 35 |                                 |     |                                                                                                                                                                                                                                                                                                                                       |                       |
| 36 |                                 |     |                                                                                                                                                                                                                                                                                                                                       |                       |
| 37 | Protocol amendments             | 25  | Plans for communicating important protocol modifications (eg, changes to eligibility criteria, outcomes, analyses) to relevant parties (eg, investigators, REC/IRBs, trial participants, trial registries, journals, regulators)                                                                                                      | <u>17</u>             |
| 38 |                                 |     |                                                                                                                                                                                                                                                                                                                                       |                       |
| 39 |                                 |     |                                                                                                                                                                                                                                                                                                                                       |                       |
| 40 |                                 |     |                                                                                                                                                                                                                                                                                                                                       |                       |
| 41 |                                 |     |                                                                                                                                                                                                                                                                                                                                       |                       |
| 42 |                                 |     |                                                                                                                                                                                                                                                                                                                                       |                       |
| 43 |                                 |     |                                                                                                                                                                                                                                                                                                                                       |                       |
| 44 |                                 |     |                                                                                                                                                                                                                                                                                                                                       |                       |
| 45 |                                 |     |                                                                                                                                                                                                                                                                                                                                       |                       |
| 46 |                                 |     |                                                                                                                                                                                                                                                                                                                                       |                       |

|    |                               |     |                                                                                                                                                                                                                                                                                     |                                                                    |
|----|-------------------------------|-----|-------------------------------------------------------------------------------------------------------------------------------------------------------------------------------------------------------------------------------------------------------------------------------------|--------------------------------------------------------------------|
| 1  | Consent or assent             | 26a | Who will obtain informed consent or assent from potential trial participants or authorised surrogates, and how (see Item 32)                                                                                                                                                        | 11                                                                 |
| 2  |                               |     |                                                                                                                                                                                                                                                                                     |                                                                    |
| 3  |                               |     |                                                                                                                                                                                                                                                                                     |                                                                    |
| 4  |                               | 26b | Additional consent provisions for collection and use of participant data and biological specimens in ancillary studies, if applicable                                                                                                                                               | Not applicable, no samples collected                               |
| 5  |                               |     |                                                                                                                                                                                                                                                                                     |                                                                    |
| 6  |                               |     |                                                                                                                                                                                                                                                                                     |                                                                    |
| 7  | Confidentiality               | 27  | How personal information about potential and enrolled participants will be collected, shared, and maintained in order to protect confidentiality before, during, and after the trial                                                                                                | 16-17                                                              |
| 8  |                               |     |                                                                                                                                                                                                                                                                                     |                                                                    |
| 9  |                               |     |                                                                                                                                                                                                                                                                                     |                                                                    |
| 10 | Declaration of interests      | 28  | Financial and other competing interests for principal investigators for the overall trial and each study site                                                                                                                                                                       | 22                                                                 |
| 11 |                               |     |                                                                                                                                                                                                                                                                                     |                                                                    |
| 12 |                               |     |                                                                                                                                                                                                                                                                                     |                                                                    |
| 13 | Access to data                | 29  | Statement of who will have access to the final trial dataset, and disclosure of contractual agreements that limit such access for investigators                                                                                                                                     | 22                                                                 |
| 14 |                               |     |                                                                                                                                                                                                                                                                                     |                                                                    |
| 15 |                               |     |                                                                                                                                                                                                                                                                                     |                                                                    |
| 16 | Ancillary and post-trial care | 30  | Provisions, if any, for ancillary and post-trial care, and for compensation to those who suffer harm from trial participation                                                                                                                                                       | Not applicable                                                     |
| 17 |                               |     |                                                                                                                                                                                                                                                                                     |                                                                    |
| 18 |                               |     |                                                                                                                                                                                                                                                                                     |                                                                    |
| 19 |                               |     |                                                                                                                                                                                                                                                                                     |                                                                    |
| 20 | Dissemination policy          | 31a | Plans for investigators and sponsor to communicate trial results to participants, healthcare professionals, the public, and other relevant groups (eg, via publication, reporting in results databases, or other data sharing arrangements), including any publication restrictions | 11                                                                 |
| 21 |                               |     |                                                                                                                                                                                                                                                                                     |                                                                    |
| 22 |                               |     |                                                                                                                                                                                                                                                                                     |                                                                    |
| 23 |                               |     |                                                                                                                                                                                                                                                                                     | Not applicable; the protocol manuscript was written by the authors |
| 24 |                               | 31b | Authorship eligibility guidelines and any intended use of professional writers                                                                                                                                                                                                      |                                                                    |
| 25 |                               |     |                                                                                                                                                                                                                                                                                     |                                                                    |
| 26 |                               | 31c | Plans, if any, for granting public access to the full protocol, participant-level dataset, and statistical code                                                                                                                                                                     | 11                                                                 |
| 27 |                               |     |                                                                                                                                                                                                                                                                                     |                                                                    |
| 28 |                               |     |                                                                                                                                                                                                                                                                                     |                                                                    |
| 29 | <b>Appendices</b>             |     |                                                                                                                                                                                                                                                                                     |                                                                    |
| 30 |                               |     |                                                                                                                                                                                                                                                                                     |                                                                    |
| 31 | Informed consent materials    | 32  | Model consent form and other related documentation given to participants and authorised surrogates                                                                                                                                                                                  | 11                                                                 |
| 32 |                               |     |                                                                                                                                                                                                                                                                                     |                                                                    |
| 33 |                               |     |                                                                                                                                                                                                                                                                                     |                                                                    |
| 34 | Biological specimens          | 33  | Plans for collection, laboratory evaluation, and storage of biological specimens for genetic or molecular analysis in the current trial and for future use in ancillary studies, if applicable                                                                                      | Not applicable, no samples collected                               |
| 35 |                               |     |                                                                                                                                                                                                                                                                                     |                                                                    |
| 36 |                               |     |                                                                                                                                                                                                                                                                                     |                                                                    |

\*It is strongly recommended that this checklist be read in conjunction with the SPIRIT 2013 Explanation & Elaboration for important clarification on the items. Amendments to the protocol should be tracked and dated. The SPIRIT checklist is copyrighted by the SPIRIT Group under the Creative Commons [“Attribution-NonCommercial-NoDerivs 3.0 Unported”](https://creativecommons.org/licenses/by-nc-nd/3.0/) license.

# BMJ Open

## Helmet noninvasive ventilation for COVID-19 patients "Helmet-COVID": study protocol for a multicenter randomized controlled trial

|                               |                                                                                                                                                                                                                                                                                                                                                                                                                                                                                                                                                                                                                                                                                                                                                                                                                                                                                                                                                                                                                                                                                                                                                                                                                                                                                                                                                                                                                                                                                                                                                                                                                                                                                                                                                                                                                                                                                                                                                                                                                                                                                                                                                                                                                                                                                                                                                                                                                                                                                                                                                                                                                                                                                                                             |
|-------------------------------|-----------------------------------------------------------------------------------------------------------------------------------------------------------------------------------------------------------------------------------------------------------------------------------------------------------------------------------------------------------------------------------------------------------------------------------------------------------------------------------------------------------------------------------------------------------------------------------------------------------------------------------------------------------------------------------------------------------------------------------------------------------------------------------------------------------------------------------------------------------------------------------------------------------------------------------------------------------------------------------------------------------------------------------------------------------------------------------------------------------------------------------------------------------------------------------------------------------------------------------------------------------------------------------------------------------------------------------------------------------------------------------------------------------------------------------------------------------------------------------------------------------------------------------------------------------------------------------------------------------------------------------------------------------------------------------------------------------------------------------------------------------------------------------------------------------------------------------------------------------------------------------------------------------------------------------------------------------------------------------------------------------------------------------------------------------------------------------------------------------------------------------------------------------------------------------------------------------------------------------------------------------------------------------------------------------------------------------------------------------------------------------------------------------------------------------------------------------------------------------------------------------------------------------------------------------------------------------------------------------------------------------------------------------------------------------------------------------------------------|
| Journal:                      | <i>BMJ Open</i>                                                                                                                                                                                                                                                                                                                                                                                                                                                                                                                                                                                                                                                                                                                                                                                                                                                                                                                                                                                                                                                                                                                                                                                                                                                                                                                                                                                                                                                                                                                                                                                                                                                                                                                                                                                                                                                                                                                                                                                                                                                                                                                                                                                                                                                                                                                                                                                                                                                                                                                                                                                                                                                                                                             |
| Manuscript ID                 | bmjopen-2021-052169.R2                                                                                                                                                                                                                                                                                                                                                                                                                                                                                                                                                                                                                                                                                                                                                                                                                                                                                                                                                                                                                                                                                                                                                                                                                                                                                                                                                                                                                                                                                                                                                                                                                                                                                                                                                                                                                                                                                                                                                                                                                                                                                                                                                                                                                                                                                                                                                                                                                                                                                                                                                                                                                                                                                                      |
| Article Type:                 | Protocol                                                                                                                                                                                                                                                                                                                                                                                                                                                                                                                                                                                                                                                                                                                                                                                                                                                                                                                                                                                                                                                                                                                                                                                                                                                                                                                                                                                                                                                                                                                                                                                                                                                                                                                                                                                                                                                                                                                                                                                                                                                                                                                                                                                                                                                                                                                                                                                                                                                                                                                                                                                                                                                                                                                    |
| Date Submitted by the Author: | 28-Jul-2021                                                                                                                                                                                                                                                                                                                                                                                                                                                                                                                                                                                                                                                                                                                                                                                                                                                                                                                                                                                                                                                                                                                                                                                                                                                                                                                                                                                                                                                                                                                                                                                                                                                                                                                                                                                                                                                                                                                                                                                                                                                                                                                                                                                                                                                                                                                                                                                                                                                                                                                                                                                                                                                                                                                 |
| Complete List of Authors:     | <p>Arabi, Yaseen; Ministry of National Guard Health Affairs, Intensive Care Department; King Saud bin Abdulaziz University for Health Sciences, King Abdullah International Medical Research Center<br/> Tlayjeh, Haytham; Ministry of National Guard Health Affairs, Intensive Care Department; King Saud bin Abdulaziz University for Health Sciences, King Abdullah International Medical Research Center<br/> Aldekhyl, Sara; Ministry of National Guard Health Affairs, Intensive Care Department; King Saud bin Abdulaziz University for Health Sciences, King Abdullah International Medical Research Center<br/> Al-Dorzi, Hasan; Ministry of National Guard Health Affairs, Intensive Care Department; King Saud bin Abdulaziz University for Health Sciences, King Abdullah International Medical Research Center<br/> Abdukahil, Sheryl Ann; Ministry of National Guard Health Affairs, Intensive Care Department; King Saud bin Abdulaziz University for Health Sciences, King Abdullah International Medical Research Center<br/> Al Harbi, Mohammad Khulaif ; Ministry of National Guard Health Affairs, Department of Anesthesia; King Saud bin Abdulaziz University for Health Sciences, King Abdullah International Medical Research Center<br/> Al Haji, Husain; Ministry of National Guard Health Affairs, Respiratory Services Department; King Saud bin Abdulaziz University for Health Sciences, King Abdullah International Medical Research Center<br/> Al Mutairi, Mohammed ; Ministry of National Guard Health Affairs, Respiratory Services Department; King Saud bin Abdulaziz University for Health Sciences, King Abdullah International Medical Research Center<br/> Al Zumai, Omar ; Ministry of National Guard Health Affairs, Respiratory Services Department; King Saud bin Abdulaziz University for Health Sciences<br/> Al Qasim, Eman; Ministry of National Guard Health Affairs, Intensive Care Department; King Saud bin Abdulaziz University for Health Sciences, King Abdullah International Medical Research Center<br/> Al Wehaibi , Wedyan; Ministry of National Guard Health Affairs, Intensive Care Department; King Saud bin Abdulaziz University for Health Sciences, King Abdullah International Medical Research Center<br/> Al Qahtani, Saad; Ministry of National Guard Health Affairs, Intensive Care Department; King Saud bin Abdulaziz University for Health Sciences<br/> Al-Hameed, Fahad ; Ministry of National Guard Health Affairs, Intensive Care Department; King Saud bin Abdulaziz University for Health Sciences, King Abdullah International Medical Research Center<br/> Chalabi, Jamal; Ministry of National Guard Health Affairs, Intensive Care</p> |

|                                 |                                                                                                                                                                                                                                                                                                                                                                                                                                                                                                                                                                                                                                                                                                                                                                                                                                                                                                                                                                                                                                                                                                                                                                                                                                                                                                                                                                                                                                                                                                                                                                                                                                                                                                                                                                                                                                                                                                                                                                                                                                                                                                                                                                                                                                                                                                                                                                                                                                                                                                                                                                                                                                                                                                                   |
|---------------------------------|-------------------------------------------------------------------------------------------------------------------------------------------------------------------------------------------------------------------------------------------------------------------------------------------------------------------------------------------------------------------------------------------------------------------------------------------------------------------------------------------------------------------------------------------------------------------------------------------------------------------------------------------------------------------------------------------------------------------------------------------------------------------------------------------------------------------------------------------------------------------------------------------------------------------------------------------------------------------------------------------------------------------------------------------------------------------------------------------------------------------------------------------------------------------------------------------------------------------------------------------------------------------------------------------------------------------------------------------------------------------------------------------------------------------------------------------------------------------------------------------------------------------------------------------------------------------------------------------------------------------------------------------------------------------------------------------------------------------------------------------------------------------------------------------------------------------------------------------------------------------------------------------------------------------------------------------------------------------------------------------------------------------------------------------------------------------------------------------------------------------------------------------------------------------------------------------------------------------------------------------------------------------------------------------------------------------------------------------------------------------------------------------------------------------------------------------------------------------------------------------------------------------------------------------------------------------------------------------------------------------------------------------------------------------------------------------------------------------|
|                                 | <p>Department; King Saud bin Abdulaziz University for Health Sciences, King Abdullah International Medical Research Center</p> <p>Alshahrani, Mohammed; Imam Abdulrahman Bin Faisal University King Fahd Hospital of the University, Department of Emergency and Critical Care</p> <p>Alharthy, Abdulrahman; King Saud Medical City, Intensive Care Department</p> <p>Mady, Ahmed; King Saud Medical City, Intensive Care Department; Tanta University, College of Medicine</p> <p>Bin Eshaq, Abdulhadi; King Khalid Hospital Najran</p> <p>A. Al bshabshe, Ali; King Khalid University; Aseer Central Hospital</p> <p>Al Aseri , Zohair; King Saud University Medical City, Emergency and Intensive Care Department</p> <p>Al Duhailib, Zainab; King Faisal Specialist Hospital and Research Center, Adult Critical Care Department</p> <p>Kharaba, Ayman; King Fahad Hospital Madinah, Pulmonary &amp; Critical Care Departments</p> <p>Alqahtani, Rakan ; King Khalid University Hospital</p> <p>Al Ghamdi, Adnan; Prince Sultan Military Medical City, Department of Intensive Care Services</p> <p>Altalag, Ali; Prince Sultan Military Medical City, Department of Intensive Care Services</p> <p>Alghamdi, Khalid ; King Faisal Specialist Hospital and Research Centre - Jeddah, Intensive Care Department</p> <p>Almaani, Mohammed; King Fahad Medical City, Department of Pulmonary &amp; Critical Care Medicine</p> <p>Algethamy, Haifa; King Abdulaziz University Hospital</p> <p>Al Aqeily, Ahmad ; Ministry of National Guard Health Affairs, Respiratory Services Department; King Saud bin Abdulaziz University for Health Sciences, King Abdullah International Medical Research Center</p> <p>Al Baseet, Faisal ; Ministry of National Guard Health Affairs, Respiratory Services Department; King Saud bin Abdulaziz University for Health Sciences, King Abdullah International Medical Research Center</p> <p>Al Samannoudi, Hashem ; Ministry of National Guard Health Affairs, Respiratory Services Department; King Saud bin Abdulaziz University for Health Sciences, King Abdullah International Medical Research Center</p> <p>Al Obaidi, Mohammed ; Ministry of National Guard Health Affairs, Respiratory Services Department; King Saud bin Abdulaziz University for Health Sciences, King Abdullah International Medical Research Center</p> <p>Ismail, Yassin; Ministry of National Guard Health Affairs, Respiratory Services Department; King Saud bin Abdulaziz University for Health Sciences, King Abdullah International Medical Research Center</p> <p>Al-Fares, Abdulrahman A; Al-Amiri Hospital , Department of Anesthesia, Critical Care Medicine and Pain Medicine</p> |
| <b>Primary Subject Heading</b>: | Intensive care                                                                                                                                                                                                                                                                                                                                                                                                                                                                                                                                                                                                                                                                                                                                                                                                                                                                                                                                                                                                                                                                                                                                                                                                                                                                                                                                                                                                                                                                                                                                                                                                                                                                                                                                                                                                                                                                                                                                                                                                                                                                                                                                                                                                                                                                                                                                                                                                                                                                                                                                                                                                                                                                                                    |
| Secondary Subject Heading:      | Intensive care, Respiratory medicine, Infectious diseases                                                                                                                                                                                                                                                                                                                                                                                                                                                                                                                                                                                                                                                                                                                                                                                                                                                                                                                                                                                                                                                                                                                                                                                                                                                                                                                                                                                                                                                                                                                                                                                                                                                                                                                                                                                                                                                                                                                                                                                                                                                                                                                                                                                                                                                                                                                                                                                                                                                                                                                                                                                                                                                         |
| Keywords:                       | Adult intensive & critical care < INTENSIVE & CRITICAL CARE, RESPIRATORY MEDICINE (see Thoracic Medicine), COVID-19                                                                                                                                                                                                                                                                                                                                                                                                                                                                                                                                                                                                                                                                                                                                                                                                                                                                                                                                                                                                                                                                                                                                                                                                                                                                                                                                                                                                                                                                                                                                                                                                                                                                                                                                                                                                                                                                                                                                                                                                                                                                                                                                                                                                                                                                                                                                                                                                                                                                                                                                                                                               |
|                                 |                                                                                                                                                                                                                                                                                                                                                                                                                                                                                                                                                                                                                                                                                                                                                                                                                                                                                                                                                                                                                                                                                                                                                                                                                                                                                                                                                                                                                                                                                                                                                                                                                                                                                                                                                                                                                                                                                                                                                                                                                                                                                                                                                                                                                                                                                                                                                                                                                                                                                                                                                                                                                                                                                                                   |

SCHOLARONE™  
Manuscripts



I, the Submitting Author has the right to grant and does grant on behalf of all authors of the Work (as defined in the below author licence), an exclusive licence and/or a non-exclusive licence for contributions from authors who are: i) UK Crown employees; ii) where BMJ has agreed a CC-BY licence shall apply, and/or iii) in accordance with the terms applicable for US Federal Government officers or employees acting as part of their official duties; on a worldwide, perpetual, irrevocable, royalty-free basis to BMJ Publishing Group Ltd ("BMJ") its licensees and where the relevant Journal is co-owned by BMJ to the co-owners of the Journal, to publish the Work in this journal and any other BMJ products and to exploit all rights, as set out in our [licence](#).

The Submitting Author accepts and understands that any supply made under these terms is made by BMJ to the Submitting Author unless you are acting as an employee on behalf of your employer or a postgraduate student of an affiliated institution which is paying any applicable article publishing charge ("APC") for Open Access articles. Where the Submitting Author wishes to make the Work available on an Open Access basis (and intends to pay the relevant APC), the terms of reuse of such Open Access shall be governed by a Creative Commons licence – details of these licences and which [Creative Commons](#) licence will apply to this Work are set out in our licence referred to above.

Other than as permitted in any relevant BMJ Author's Self Archiving Policies, I confirm this Work has not been accepted for publication elsewhere, is not being considered for publication elsewhere and does not duplicate material already published. I confirm all authors consent to publication of this Work and authorise the granting of this licence.

1  
2  
3  
4 **Helmet noninvasive ventilation for COVID-19 patients “Helmet-COVID”: study protocol**  
5 **for a multicenter randomized controlled trial**  
6

7  
8 **Yaseen Arabi, MD FCCP, FCCM, ATSF [YA]**

9 Intensive Care Department, Ministry of National Guard Health Affairs, Riyadh, Saudi Arabia  
10 King Abdullah International Medical Research Center  
11 King Saud Bin Abdulaziz University for Health Sciences, Riyadh, Saudi Arabia  
12 [yaseenarabi@yahoo.com](mailto:yaseenarabi@yahoo.com)  
13

14 **Haytham Tlayjeh, MD [HT]**

15 Intensive Care Department, Ministry of National Guard Health Affairs, Riyadh, Saudi Arabia  
16 King Abdullah International Medical Research Center  
17 King Saud Bin Abdulaziz University for Health Sciences, Riyadh, Saudi Arabia  
18 [tlayjehh@ngha.med.sa](mailto:tlayjehh@ngha.med.sa)  
19

20  
21 **Sara Aldekhyl, MBBS [SD]**

22 College of Medicine, King Saud Bin Abdulaziz University for Health Sciences, Riyadh, Saudi  
23 Arabia  
24 King Abdullah International Medical Research Center  
25 Ministry of National Guard Health Affairs, Riyadh, Saudi Arabia  
26 [DakheelS@NGHA.MED.SA](mailto:DakheelS@NGHA.MED.SA)  
27

28 **Hasan Al-Dorzi, MD [HD]**

29 Intensive Care Department, Ministry of National Guard Health Affairs, Riyadh, Saudi Arabia  
30 King Abdullah International Medical Research Center  
31 King Saud Bin Abdulaziz University for Health Sciences, Riyadh, Saudi Arabia  
32 [aldorzi@yahoo.com](mailto:aldorzi@yahoo.com)  
33

34 **Sheryl Ann Abdukahil, RN [SA]**

35 Intensive Care Department, Ministry of National Guard Health Affairs, Riyadh, Saudi Arabia  
36 King Abdullah International Medical Research Center  
37 King Saud Bin Abdulaziz University for Health Sciences, Riyadh, Saudi Arabia  
38 [abdukahil.sheryl@gmail.com](mailto:abdukahil.sheryl@gmail.com)  
39

40  
41 **Mohammad Khulaif Al Harbi, MD, FRCPC [MH]**

42 Department of Anesthesia, Ministry of National Guard Health Affairs, Riyadh, Saudi Arabia  
43 King Abdullah International Medical Research Center  
44 College of Medicine, King Saud Bin Abdulaziz University for Health Sciences, Riyadh, Saudi  
45 Arabia  
46 [HarbiMK@NGHA.MED.SA](mailto:HarbiMK@NGHA.MED.SA)  
47

48 **Husain Al Haji, RRT [HH]**

49 Respiratory Services Department, Ministry of National Guard Health Affairs, Riyadh, Saudi  
50 Arabia  
51 King Abdullah International Medical Research Center  
52 King Saud Bin Abdulaziz University for Health Sciences, Riyadh, Saudi Arabia  
53 [HajiH@NGHA.MED.SA](mailto:HajiH@NGHA.MED.SA)  
54

55  
56 **Mohammed Al Mutairi, RRT [MM]**

57 Respiratory Services Department, Ministry of National Guard Health Affairs, Riyadh, Saudi Arabia  
58 King Abdullah International Medical Research Center  
59 King Saud Bin Abdulaziz University for Health Sciences, Riyadh, Saudi Arabia  
60 [MutairyMM@NGHA.MED.SA](mailto:MutairyMM@NGHA.MED.SA)

**Omar Al Zumai, RRT [OZ]**

Respiratory Services Department, Ministry of National Guard Health Affairs, Riyadh, Saudi Arabia

King Abdullah International Medical Research Center

King Saud Bin Abdulaziz University for Health Sciences, Riyadh, Saudi Arabia

[ZumaiO@NGHA.MED.SA](mailto:ZumaiO@NGHA.MED.SA)

**Eman Al Qasim, RN, MSN [EQ]**

Research Office, King Abdullah International Medical Research Center

King Saud Bin Abdulaziz University for Health Sciences, Riyadh, Saudi Arabia

Ministry of National Guard Health Affairs, Riyadh, Saudi Arabia

[Eman77al-qasim@hotmail.com](mailto:Eman77al-qasim@hotmail.com)

**Wedyan Al Wehaibi [WW]**

Intensive Care Department, Ministry of National Guard Health Affairs, Riyadh, Saudi Arabia

King Abdullah International Medical Research Center

King Saud Bin Abdulaziz University for Health Sciences, Riyadh, Saudi Arabia

[wedyan.mohammed@outlook.com](mailto:wedyan.mohammed@outlook.com)

**Saad Al Qahtani, MD, MMED, MAHA, FRCPC [SQ]**

Intensive Care Department, Ministry of National Guard Health Affairs, Riyadh, Saudi Arabia

King Abdullah International Medical Research Center

King Saud Bin Abdulaziz University for Health Sciences, Riyadh, Saudi Arabia

[mcmasterer@hotmail.com](mailto:mcmasterer@hotmail.com)

**Fahad Al-Hameed, MD, FRCPC [FH]**

Intensive Care Department, Ministry of National Guard Health Affairs, Jeddah, Saudi Arabia

King Abdullah International Medical Research Center

King Saud Bin Abdulaziz University for Health Sciences, Jeddah, Saudi Arabia

[HameedF@ngha.med.sa](mailto:HameedF@ngha.med.sa)

**Jamal Chalabi, MD [JC]**

Intensive Care Department, Ministry of National Guard Health Affairs, Al Ahsa, Saudi Arabia

King Abdullah International Medical Research Center

King Saud Bin Abdulaziz University for Health Sciences, Al Ahsa, Saudi Arabia

[ChalabiJA@NGHA.MED.SA](mailto:ChalabiJA@NGHA.MED.SA)

**Mohammed Alshahrani, MBBS , SSC-EM, ArEM, FCCM [MS]**

Department of Emergency and Critical Care

King Fahad Hospital of the University

University of Dammam

Al Khobar, Kingdom of Saudi Arabia

[msshahrani@uod.edu.sa](mailto:msshahrani@uod.edu.sa)

**Talal Albrahim, MD [TI]**

Department of Critical Care

King Fahad Hospital of the University

Imam Abdulrahman Bin Faisal University

Al Khobar, Kingdom of Saudi Arabia

[talbrahim@iau.edu.sa](mailto:talbrahim@iau.edu.sa)

**Abdulrahman Alharthy, MD [AH]**

Intensive Care Department

King Saud Medical City

Riyadh, Saudi Arabia

[a\\_almsal@hotmail.com](mailto:a_almsal@hotmail.com)



**Ahmed Mady, MBBCH, MSc, MD,S-FCCM,FCCP [AM]**

Intensive Care Department  
King Saud Medical City  
Riyadh, Saudi Arabia  
College of Medicine  
Tanta University, Egypt  
[afmady@hotmail.com](mailto:afmady@hotmail.com)

**Abdulhadi Bin Eshaq, MD [AE]**

Intensive Care Department  
King Khalid Hospital, Najran  
[drbineshaq@gmail.com](mailto:drbineshaq@gmail.com)

**Ali Al Bshabshe, MD, SSCIM, JBIM, ArBIM, MRCP(UK),EDIC,CNSC [AB]**

Department of Critical Care Medicine  
King Khalid University, Aseer Central Hospital  
Abha, Kingdom of Saudi Arabia  
[albshabshe@yahoo.com](mailto:albshabshe@yahoo.com)

**Zohair Al Aseri, MD, FCEM, FRCPC [ZA]**

Emergency and Intensive Care Departments  
College of Medicine  
King Saud University  
Riyadh, Saudi Arabia  
[zohairalaseri@yahoo.com](mailto:zohairalaseri@yahoo.com)

**Zainab Al Duhailib, MBBS, EDIC, MSc [ZD]**

Adult Critical Care Department  
King Faisal Specialist Hospital & Research Center  
Riyadh, Saudi Arabia  
[zalduhailib65@kfshrc.edu.sa](mailto:zalduhailib65@kfshrc.edu.sa)

**Ayman Kharaba MD, ABIM,FRCPC [AK]**

Pulmonary & Critical Care Departments, King Fahad Hospital Madinah  
Critical Care Units- Madinah Region, Ministry of Health  
[a7yman@hotmail.com](mailto:a7yman@hotmail.com)

**Rakan Alqahtani, MD [RQ]**

Department of Critical Care, King Khalid University Hospital  
King Saud University Medical City, Riyadh, Saudi Arabia.  
[arakan@KSU.EDU.SA](mailto:arakan@KSU.EDU.SA)

**Adnan Al Ghamdi, MD [AG]**

Department of Intensive Care Services  
Prince Sultan Military Medical City  
Riyadh, Saudi Arabia  
[sbb1971@hotmail.com](mailto:sbb1971@hotmail.com)

**Ali Altalag, MD [AT]**

Department of Intensive Care Services  
Prince Sultan Military Medical City, Riyadh, Saudi Arabia  
[drtalag@yahoo.com](mailto:drtalag@yahoo.com)

**Khalid Alghamdi, MD [KG]**

Intensive Care Department



1  
2  
3 King Faisal Specialist Hospital & Research Center, Jeddah, Saudi Arabia  
4 [kal-ghamdi@kfshrc.edu.sa](mailto:kal-ghamdi@kfshrc.edu.sa)  
5

6 **Mohammed Almaani, MD,SSC- Em, ArBEM, UWO FCCM [MA]**

7 Department of Pulmonary & Critical Care Medicine  
8 King Fahad Medical City  
9 King Saud Bin Abdulaziz University for Health Sciences  
10 Riyadh, Saudi Arabia  
11 [malmaani@kfmc.med.sa](mailto:malmaani@kfmc.med.sa)

12 **Haifa Algethamy, MD [HG]**

13 Department of Anesthesia  
14 King Abdulaziz University Hospital  
15 Jeddah, Saudi Arabia  
16 [halgethamy2020@gmail.com](mailto:halgethamy2020@gmail.com)  
17

18  
19 **Ahmad Al Aqeily, RRT [AA]**

20 Respiratory Services Department, Ministry of National Guard Health Affairs, Riyadh, Saudi  
21 Arabia  
22 King Abdullah International Medical Research Center  
23 King Saud Bin Abdulaziz University for Health Sciences, Riyadh, Saudi Arabia  
24 [AqeilA@NGHA.MED.SA](mailto:AqeilA@NGHA.MED.SA)  
25

26  
27 **Faisal Al Baseet, RRT [FB]**

28 Respiratory Services Department, Ministry of National Guard Health Affairs, Riyadh, Saudi  
29 Arabia  
30 King Abdullah International Medical Research Center  
31 King Saud Bin Abdulaziz University for Health Sciences, Riyadh, Saudi Arabia  
32 [albaseetfa@NGHA.MED.SA](mailto:albaseetfa@NGHA.MED.SA)  
33

34  
35 **Hashem Al Samannoudi, RRT [HS]**

36 Respiratory Services Department, Ministry of National Guard Health Affairs, Riyadh, Saudi  
37 Arabia  
38 King Abdullah International Medical Research Center  
39 King Saud Bin Abdulaziz University for Health Sciences, Riyadh, Saudi Arabia  
40 [SamannoudiHa@NGHA.MED.SA](mailto:SamannoudiHa@NGHA.MED.SA)  
41

42  
43 **Mohammed Al Obaidi, RRT [MO]**

44 Respiratory Services Department, Ministry of National Guard Health Affairs, Riyadh, Saudi  
45 Arabia  
46 King Abdullah International Medical Research Center  
47 King Saud Bin Abdulaziz University for Health Sciences, Riyadh, Saudi Arabia  
48 [alobaidimo@NGHA.MED.SA](mailto:alobaidimo@NGHA.MED.SA)  
49

50  
51 **Yassin Ismaiel, RRT [YI]**

52 Respiratory Services Department, Ministry of National Guard Health Affairs, Riyadh, Saudi  
53 Arabia  
54 King Abdullah International Medical Research Center  
55 King Saud Bin Abdulaziz University for Health Sciences, Riyadh, Saudi Arabia  
56 [IsmaeiY@NGHA.MED.SA](mailto:IsmaeiY@NGHA.MED.SA)  
57

58  
59 **Abdulrahman A Al-Fares, MBChB, MRCP, ABIM, FRCPC [AF]**

60 Department of Anesthesia, Critical Care Medicine and Pain Medicine  
Al-Amiri Hospital, Ministry of Health, Kuwait  
[abdulrahman.alfares@gmail.com](mailto:abdulrahman.alfares@gmail.com)

**Corresponding author**

1  
2  
3 **Yaseen Arabi, MD FCCP, FCCM, ATSF [YA]**

4 (ORCID: 0000-0001-5735-6241)

5 Intensive Care Department, Ministry of National Guard Health Affairs, Riyadh, Saudi Arabia

6 King Abdullah International Medical Research Center

7 King Saud Bin Abdulaziz University for Health Sciences, Riyadh, Saudi Arabia

8 [yaseenarabi@yahoo.com](mailto:yaseenarabi@yahoo.com)  
9  
10  
11  
12  
13  
14  
15  
16  
17  
18  
19  
20  
21  
22  
23  
24  
25  
26  
27  
28  
29  
30  
31  
32  
33  
34  
35  
36  
37  
38  
39  
40  
41  
42  
43  
44  
45  
46  
47  
48  
49  
50  
51  
52  
53  
54  
55  
56  
57  
58  
59  
60

For peer review only

## Abstract

### Introduction

Noninvasive ventilation delivered by helmet is has been used for respiratory support of patients with acute hypoxemic respiratory failure due to COVID-19 pneumonia. The aim of this study is to compare helmet noninvasive ventilation with usual care versus usual care alone to reduce the mortality.

### Methods and analysis

This is a multicenter, pragmatic, parallel, randomized controlled trial that compares helmet noninvasive ventilation with usual care to usual care alone in 1:1 ratio. A total of 320 patients will be enrolled in this study. The primary outcome is 28-day all-cause mortality. The primary outcome will be compared between the two study groups in the intention-to-treat and per-protocol cohorts. An interim analysis will be conducted for both safety and effectiveness.

### Ethics and dissemination

Approvals are obtained from the Institutional Review Boards (IRBs) of each participating institution. Our findings will be published in peer-review journals and presented at relevant conferences and meetings.

**Trial registration number** NCT04477668 registered on July 20, 2020

### Article Summary

#### Strengths and limitations of this study

- This trial compares helmet NIV to usual care for respiratory support of patients with acute hypoxemic respiratory failure due to COVID-19 pneumonia.
- The trial is a multi-center, pragmatic, parallel randomized controlled trial.
- The main limitation is the unblinded design due to the nature of the intervention.

## Introduction

The novel severe acute respiratory syndrome coronavirus 2 (SARS-CoV-2) has led to a pandemic resulting in over 181 million cases and approximately 3.9 million fatalities as of June 29, 2021.<sup>1</sup> The resulting Coronavirus Disease 2019 (COVID-19) leads to severe pneumonia and acute respiratory distress syndrome (ARDS) among other organ injury.<sup>2</sup> ARDS may occur in up to 5% of infected patients.<sup>3-5</sup> Early in the pandemic, invasive mechanical ventilation was widely used because of concerns about noninvasive ventilation safety and efficacy. However, noninvasive ventilation (NIV) use increased with time, including mask NIV and helmet NIV.

NIV has been shown to be physiologic benefits in patients with acute hypoxemic respiratory failure (AHRF) secondary to pulmonary edema, atelectasis, or pneumonia.<sup>6</sup> It has been shown to improve arterial oxygenation by increasing functional residual capacity, shifting the tidal volume to a more compliant part of the pressure-volume curve, thus reducing both the work of breathing and the risk of tidal opening and closure of the airways.<sup>7</sup> NIV is commonly provided through nasal or oro-nasal interfaces. The resulting aerosol generation may increase the risk of transmission of pathogens to healthcare providers, raising concerns about the use of NIV in patients with viral pneumonia.<sup>8</sup> Helmet NIV has been used for AHRF including patients with COVID-19 pneumonia. The helmet surrounds the patient's entire head to provide positive pressure and supply oxygen and is sealed with a soft, airtight collar that wraps around the neck. Due to this design, it has advantages over the nasal and oro-nasal interfaces. These include less air leaks, no skin or nasal bridge skin injuries, no eye irritation, fitting for different facial contours,<sup>9</sup> and hypothetically less dissemination of aerosols in the environment. However, helmet interface may be associated with increase in dead space (especially if the settings are not used appropriately), claustrophobia, discomfort, and difficulty in access for suction and feeding.

1  
2  
3 Evaluation of helmet NIV as a respiratory support modality started more than two decades  
4 ago.<sup>10</sup> Helmet NIV has been investigated as a treatment for different forms of AHRF in adults  
5 in various settings, such as pre-hospital ambulance, emergency department and ICU.<sup>7 11-15</sup>  
6  
7 However, earlier clinical studies are relatively scarce and mostly small in size, and often  
8 used improvement in oxygenation and intubation rate as primary outcomes.<sup>6</sup>  
9  
10 However, the evidence on helmet NIV for AHRF is growing. A systematic review of  
11 randomized controlled trials (RCTs) and observational studies published before June 2016  
12 found 11 studies involving 621 patients.<sup>16</sup> Compared with controls, the use of the helmet was  
13 associated with lower hospital mortality, intubation rate, and complications.<sup>16</sup> Moreover,  
14 there was no significant difference in gas exchange and ICU stay.<sup>16</sup> A meta-analysis of four  
15 RCTs (377 patients) showed that helmet NIV significantly increased the ratio of arterial  
16 oxygen partial pressure to fraction of inspired oxygen ( $\text{PaO}_2/\text{FiO}_2$ ) and decreased arterial  
17 carbon dioxide levels, intubation rate and in-hospital mortality compared to standard oxygen  
18 therapy.<sup>17</sup> In a more recent systematic review and network meta-analysis that included 25  
19 studies (published up to April 2020) and 3804 patients with AHRF, mortality and intubation  
20 rate were lower with helmet NIV compared to standard oxygen by more than 50%, while the  
21 effect of mask NIV and high-flow nasal oxygen were modest compared to standard  
22 oxygen.<sup>18</sup> Helmet NIV was superior to both mask NIV and high-flow nasal oxygen, while  
23 mask NIV and high-flow nasal oxygen were not different in their effects on mortality and  
24 intubation rate.<sup>18</sup> One study reported the cost-effectiveness of helmet NIV compared to mask  
25 NIV.<sup>19</sup>  
26  
27  
28  
29  
30  
31  
32  
33  
34  
35  
36  
37  
38  
39  
40  
41  
42  
43  
44  
45  
46  
47  
48  
49  
50

51 Data on helmet NIV in AHRF related to COVID-19 are emerging. A recent RCT conducted in  
52 4 Italian ICUs on patients with COVID-19 and moderate to severe AHRF found that  
53 treatment with helmet NIV did not result in significantly fewer days of respiratory support at  
54 28 days from randomization (primary outcome) as compared with high-flow nasal oxygen  
55 alone (mean difference 2 days, 95% CI, -2 to 6,  $p=0.26$ ).<sup>20</sup> Nevertheless, the intubation rate  
56  
57  
58  
59  
60

1  
2  
3 was significantly lower in the helmet NIV group compared to the high-flow nasal oxygen  
4 group (30% vs 51%;  $p=0.03$ ).<sup>20</sup> Additionally, the median number of days free of invasive  
5 mechanical ventilation within 28 days was significantly higher in the helmet NIV group than  
6 in the high-flow nasal oxygen group (28 versus 25 days; mean difference, 3 days; 95% CI, 0-  
7 7;  $P = 0.04$ ).<sup>20</sup> The hospital mortality was 24% in the helmet NIV group and 25% in the high-  
8 flow nasal oxygen group.<sup>20</sup>

9  
10  
11  
12  
13  
14  
15  
16 As the efficacy of helmet NIV to improve outcomes in severe AHRF due to COVID-19  
17 pneumonia has not been clearly established, the aim of this study is to compare helmet NIV  
18 with usual care versus usual care alone to reduce 28-day all-cause mortality. We  
19 hypothesize that helmet NIV will reduce 28-day all-cause mortality in patients with suspected  
20 or confirmed severe COVID-19 pneumonia and AHRF.  
21  
22  
23  
24  
25  
26  
27  
28  
29

## 30 **Methods and analysis**

### 31 **Trial design**

32  
33  
34  
35 This is an investigator-initiated, pragmatic parallel RCT that will compare helmet NIV with  
36 usual care to usual care alone in 1:1 ratio in patients with suspected or confirmed COVID-19  
37 pneumonia and AHRF. Randomization is performed using a computer-generated schedule  
38 using variable block sizes (4 or 6) and is stratified by site. The trial is sponsored by King  
39 Abdullah International Medical Research Center, Riyadh, Saudi Arabia, has been registered  
40 with ClinicalTrials.gov (NCT04477668) and is conducted across multiple centers in Saudi  
41 Arabia. Training and in-service education on helmet NIV use as well as on protocol  
42 implementation are provided to all participating centers. The competency of the bedside  
43 respiratory therapists is supervised by experienced respiratory care supervisors and  
44 intensivists.  
45  
46  
47  
48  
49  
50  
51  
52  
53  
54  
55  
56  
57  
58  
59  
60

## Sample size

In a large observation study of patients with AHRF and ARDS, hospital mortality was 34.9% (95% CI, 31.4-38.5%) for patients with mild ARDS, 40.3% (95% CI, 37.4%-43.3%) for those with moderate ARDS, and 46.1% (95% CI, 41.9%-50.4%) for those with severe ARDS.<sup>21</sup> A systematic review found an overall pooled mortality estimate among 10,815 patients with ARDS due to COVID-19 to be 39% (95% CI: 23–56%).<sup>22</sup> Considering a mortality rate of 40% in patients with COVID-19 pneumonia and moderate to severe ARDS treated with usual care, we calculated that enrollment of 304 patients (152 in each group) would provide the study with 80% power to demonstrate an absolute difference of 15% in the primary outcome between the usual care group and helmet NIV group at a two-sided alpha level of 0.05. To account for 5% loss to follow-up, the total number of patients required for the trial is 320 patients.

## Participant eligibility

The trial will enroll ICU patients with suspected<sup>23</sup> or confirmed COVID-19 pneumonia who have AHRF. Detailed inclusion and exclusion criteria can be found in **Table 1**.

## Informed consent

Informed consent will be obtained from the potential trial participants or their surrogate decision makers. A hybrid model of consent will be used where a priori consent is obtained if possible, otherwise delayed consent model will be obtained as per local approvals. The first patient was enrolled in February 2021. As of June 29, 2021, a total of 199 patients were enrolled from 5 sites. There are several sites that are processing IRB and regulatory approvals.

## Patient and public involvement

There was no patient or public involvement in the conception, design or conduct of the study, or the writing or editing of this paper. However, patient comfort and experience as well as compliance to the intervention were taken in to consideration and data on these are collected.

## Trial interventions

### *Helmet group*

A helmet (Subsalve, USA or its equivalent), which is made of transparent latex-free polyvinyl chloride, will be applied to patients randomized to the intervention group as per the study protocol which considers the manufacturer instructions. It will be immediately connected to an ICU ventilator in pressure support (PS) mode with positive end-expiratory pressure (PEEP) using a conventional respiratory circuit joining two port sites to allow inspiratory and expiratory flow. The starting settings is PS of 8-10 cm H<sub>2</sub>O, PEEP of 10 cmH<sub>2</sub>O with FiO<sub>2</sub> of 100%, targeting flow rate of ≥50 L/min with an inspiratory rise time of 50 msec and end flow/cycling off of 50% of maximal inspiratory flow. PEEP may be increased by 2 cm every 3 minutes to achieve oxygen saturation (SpO<sub>2</sub>) ≥90% on FIO<sub>2</sub> ≤ 60%, and PS can be increased by 2 cm every 3 minutes to achieve respiratory rate ≤ 25/min and disappearance of accessory muscle activity. The maximal allowed PS + PEEP is 30 cm H<sub>2</sub>O. Interruptions of helmet should be avoided or kept at minimum at least in the first 48 hours.<sup>20</sup> More details of helmet NIV application, set up and weaning can be found in the **Supplementary File**. Some patients may not tolerate helmet NIV. In that case, the physician or the respiratory therapist explains the procedure to the patient. Dexmedetomidine infusion may be used to improve comfort with the helmet NIV. Other intravenous sedatives such as benzodiazepines or intravenous narcotics should generally not be used. If the patient continues to be intolerant to the helmet, the patient can be managed according to the usual care. Detailed data about helmet NIV tolerance are collected.



### **Control group**

In the control group, patients receive usual care according to the clinical practices of each site. This may include oxygen provided using standard oxygen devices, high-flow nasal oxygen or NIV provided by nasal mask, face mask or total mask.

### **Endotracheal Intubation**

The decision to intubate will be at the discretion of the treating team with no involvement from the research team. However, the protocol provides guidance on assessing patients for the need of endotracheal intubation throughout the study period (for both study groups: helmet NIV or usual care) according to the following general principles:

Enrolled patients should be assessed within 4 hours of enrollment (or sooner as required) and at frequent intervals for the following criteria, although the decision is usually not based on a single variable:

- Neurologic deterioration (*not attributed to sedation*)
- Persistent or worsening respiratory failure of NIV (manifesting as oxygen saturation <88%, respiratory rate >36/min, PaO<sub>2</sub>/FiO<sub>2</sub> ratio <100 or persistent requirement of FiO<sub>2</sub> ≥70%)
- Intolerance of face mask or helmet
- Airway bleeding
- Copious respiratory secretions
- Respiratory acidosis with pH <7.25
- Hemodynamic instability
- Significant radiologic worsening

### Co-Interventions

Patients who require endotracheal intubation are managed by the primary team with lung protective strategy with tidal volumes of 6 mL/kg of predicted body weight and titration of PEEP to achieve oxygen saturation of 88% to 95% at the lowest possible FiO<sub>2</sub>. Daily interruption of sedation, awakening and breathing trials, and early mobilization are performed as per the ICU standards.<sup>24</sup> Management of COVID-19 is provided as per local protocols; physicians are advised to follow the clinical practice guidelines set by the Saudi Critical Care Society,<sup>25</sup> the Surviving Sepsis Campaign,<sup>26 27</sup> and the World Health Organization.<sup>28</sup> The study protocol does not mandate particular therapies; however, corticosteroids, immune modulators and antiviral therapy are all recorded. Conservative fluid management is recommended where neutral balance should be targeted and intravenous resuscitation should be reserved for shock treatment in both groups and fluid balance is recorded.

### Blinding

Due to the nature of the study intervention, blinding is not be possible.

### Recruitment schedule and enrollment procedures

Schedule of assessments is detailed in **Table 2**. All non-intubated subjects with suspected or confirmed COVID-19 are screened upon admission to the ICU. A screening log will be kept to monitor and report the size of the patient population from which eligible patients have been randomized. Co-enrollment in other RCTs is permissible as long as inclusion in the other RCT would not confound the results of this trial and after discussion with the steering committees of the other studies.

## Data collection

Baseline data on demographics, admission diagnosis and clinical information are collected. Clinical information include Acute Physiology and Chronic Health Evaluation (APACHE) II score,<sup>29</sup> source of admission, ICU admission category (elective, emergency or non-surgical), ICU admission diagnosis and co-morbidities (as defined by the APACHE II severity of illness scoring system). Daily data will be recorded until discharge from ICU or 28 days after randomization. We will collect data on the use of helmet including the tolerance of helmet (>1-hour use).

## Outcomes

The primary outcome is 28-day all-cause mortality. Secondary outcomes are intubation rate within 28 days, ICU mortality, hospital mortality (censored at day 180), ICU-free days at day 28, invasive ventilation-free days at day 28, renal replacement therapy-free days at day 28 and vasopressor-free days at day 28. Safety outcomes include skin pressure injuries, barotrauma and serious adverse events (including cardiovascular events and device complications).

Additionally, there will be a follow up of enrolled patients at day 180 about vital status, functional status (EuroQoL (EQ)-5D-5L) which is planned to be reported separately. For patients who have been discharged from hospital before day 180, follow up will be conducted by telephone.

## Data analysis

A formal statistical analysis plan will be agreed upon and placed in the public domain before the study database is locked for the analysis of the primary outcome. The primary outcome

1  
2  
3 will be compared in the intention-to-treat and per-protocol cohorts (effectiveness analysis)  
4 using the chi-square test. Results will be reported as relative risk with 95% CI. Kaplan–Meier  
5 curves will be plotted to assess the time from enrollment to death and will be compared by  
6 means of the log-rank test. A two-tailed P value <0.05 will be considered to indicate  
7 statistical significance. SAS software, version 9.2 (SAS Institute) will be used for all the  
8 analyses.  
9

10  
11  
12 A priori analysis will be done for the following subgroups:  
13

- 14 I. Patients with moderate ARDS ( $\text{PaO}_2/\text{FIO}_2$  ratio 100-200) and patients with  
15 severe ARDS ( $\text{PaO}_2/\text{FIO}_2$  ratio <100)
- 16 II. Obese patients (body mass index >30  $\text{kg}/\text{m}^2$ ) and patients with body mass  
17 index  $\leq 30$
- 18 III. Patients aged >65 years and  $\leq 65$  years
- 19 IV. APACHE II score higher or lower than the median of enrolled patients  
20  
21  
22  
23  
24  
25  
26  
27  
28  
29  
30  
31

32 For the occasional randomized patient who is withdrawn from the trial and allows use of  
33 data, the patient's data will be included in the group to which he/she was allocated as per the  
34 intention-to-treat principle and the reason of withdrawal will be documented.  
35  
36  
37  
38  
39  
40

### 41 **Trial management and monitoring**

42  
43 The study Steering Committee members will be responsible for overseeing the conduct of  
44 the trial, for upholding or modifying study procedures as needed, addressing challenges with  
45 protocol implementation, formulating the analysis plan, reviewing and interpreting the data,  
46 and preparing the manuscript. This will be achieved through meetings (in-person or by  
47 conference calls) at least quarterly.  
48  
49  
50  
51  
52  
53  
54  
55  
56

57 Several measures are taken to minimize, observe and document any potential safety  
58 concerns. First, any unexpected safety concerns will be reported immediately to the Steering  
59  
60

1  
2  
3 Committee and IRB. Second, an independent Data Safety Monitoring Board will be  
4  
5 monitoring the safety of the trial. Lastly, interim analyses will be conducted after recruiting  
6  
7 1/3 and 2/3 of the total patients and the interim test statistics will be the primary outcome  
8  
9 analysis for both safety and effectiveness. The Data Safety Monitoring Board will use formal  
10  
11 stopping rules based on the primary endpoint of 28-day mortality. The trial may be stopped  
12  
13 for safety ( $p < 0.01$ ) or effectiveness ( $p < 0.001$ ). There will be no plans to terminate the trial for  
14  
15 futility. We will account for alpha spending by the O'Brien Fleming method and the final  $p$   
16  
17 value will be considered at 0.048. The principles used in the conduct of safety monitoring  
18  
19 and reporting in this trial are those outlined by Cook et al.<sup>30</sup>  
20  
21  
22  
23  
24

25  
26 In this trial, reporting of serious adverse events will be restricted to events that are not  
27  
28 captured as study outcome and are considered to be related to the helmet NIV (possibly,  
29  
30 probably or definitely).<sup>30</sup> These may include cardiovascular events (i.e., cardiac arrest and  
31  
32 hypotension with drop in blood pressure to systolic  $< 90$  mm Hg) and device complications  
33  
34 (i.e., helmet deflation).  
35  
36  
37  
38

### 39 **Ethics and dissemination**

40  
41 The study will be conducted according to the principles of the latest version of Good Clinical  
42  
43 Practice (GCP) and in accordance with all relevant local ethical, regulatory, and legal  
44  
45 requirements. A manuscript with the results of the primary study will be published in a peer-  
46  
47 reviewed journal. Separate manuscripts will be written on secondary aims, and these will  
48  
49 also be submitted for publication in peer reviewed journals as well.  
50  
51  
52  
53  
54

### 55 **Discussion**

56  
57 The importance of this study stems from the current pandemic situation as different  
58  
59 treatment modalities are being sought to answer important clinical questions. Available  
60

1  
2  
3 literature on the evaluation of helmet NIV as a respiratory support modality in COVID-19  
4 patients is limited. Table 3 provides the list of ongoing RCTs on helmet NIV. This study aims  
5 to contribute to the existing literature and in turn influence clinical practice.  
6  
7  
8

9  
10 We planned our pragmatic trial to address whether using helmet NIV as the primary non-  
11 invasive respiratory support in patients with severe COVID-19, in addition to the commonly  
12 used high-flow nasal oxygen and mask NIV improves outcome. By nature of this question,  
13 there is heterogeneity of the control group; as patients in this group could receive standard  
14 oxygen, high-flow nasal oxygen or mask NIV at the decision of the treating team. This  
15 approach is supported by a recent network meta-analysis of randomized controlled trials that  
16 showed only a modest effect of high-flow nasal oxygen and mask NIV on mortality or  
17 intubation rate compared to standard oxygen, while patients treated with helmet NIV had  
18 more than 50% reduction in mortality and intubation rate compared to the other three  
19 modalities.<sup>18</sup> In addition, this approach is likely to be more representative of usual practice in  
20 which patients may get oxygen therapy, high-flow nasal oxygen and NIV at different times  
21 during their acute illness. Given the fact that the use of helmet NIV has not been widespread  
22 across ICUs, we thought that the broader question addressed by our study might be more  
23 relevant to deciding whether to introduce this modality or not in a given ICU.  
24  
25  
26  
27  
28  
29  
30  
31  
32  
33  
34  
35  
36  
37  
38  
39  
40  
41  
42

43 The main limitation to our study is inability to blind the given allocation due to the nature of  
44 the intervention.  
45  
46  
47  
48  
49  
50  
51  
52  
53  
54  
55  
56  
57  
58  
59  
60

## REFERENCES

1. World Health Organization. <https://covid19.who.int/> Accessed on March 29, 2021.
2. Marini J, Gattinoni L. Management of COVID-19 Respiratory Distress. *Jama* 2020
3. Guan W-j, Ni Z-y, Hu Y, et al. Clinical Characteristics of Coronavirus Disease 2019 in China. *New England Journal of Medicine* 2020;382(18):1708-20. doi: 10.1056/NEJMoa2002032
4. Ñamendys-Silva SA. Respiratory support for patients with COVID-19 infection. *The Lancet Respiratory medicine* 2020;8(4):e18.
5. Richardson S, Hirsch JS, Narasimhan M, et al. Presenting Characteristics, Comorbidities, and Outcomes Among 5700 Patients Hospitalized With COVID-19 in the New York City Area. *Jama*
6. Xu X, Zhang X, Hu S, et al. Noninvasive Ventilation in Acute Hypoxemic Nonhypercapnic Respiratory Failure: A Systematic Review and Meta-Analysis, 2017.
7. Brambilla AM, Aliberti S, Prina E, et al. Helmet CPAP vs. oxygen therapy in severe hypoxemic respiratory failure due to pneumonia. *Intensive Care Med* 2014;40(7):942-9. doi: 10.1007/s00134-014-3325-5 [published Online First: 2014/05/13]
8. Arulkumaran N, Brealey D, Howell D, et al. Use of non-invasive ventilation for patients with COVID-19: a cause for concern? *The Lancet Respiratory medicine* 2020 doi: 10.1016/S2213-2600(20)30181-8
9. Rodriguez AME, Papadakos PJ, Carron M, et al. Clinical review: Helmet and non-invasive mechanical ventilation in critically ill patients. *Critical Care* 2013;17(2):223.
10. Patroniti N, Foti G, Manfio A, et al. Head helmet versus face mask for non-invasive continuous positive airway pressure: a physiological study. *Intensive care medicine* 2003;29(10):1680.
11. Cosentini R, Brambilla AM, Aliberti S, et al. Helmet continuous positive airway pressure vs oxygen therapy to improve oxygenation in community-acquired pneumonia: a randomized, controlled trial. *Chest* 2010;138(1):114-20. doi: 10.1378/chest.09-2290 [published Online First: 2010/02/16]
12. Patel BK, Wolfe KS, Pohlman AS, et al. Effect of Noninvasive Ventilation Delivered by Helmet vs Face Mask on the Rate of Endotracheal Intubation in Patients With Acute Respiratory Distress Syndrome: A Randomized Clinical Trial. *JAMA* 2016;315(22):2435.
13. Foti G, Sangalli F, Berra L, et al. Is helmet CPAP first line pre-hospital treatment of presumed severe acute pulmonary edema? *Intensive care medicine* 2009;35(4):656.
14. Squadrone V, Cocha M, Cerutti E, et al. Continuous positive airway pressure for treatment of postoperative hypoxemia: a randomized controlled trial. *Jama* 2005;293(5):589.

- 1  
2  
3 15. Patel BK, Wolfe KS, MacKenzie E, et al. One Year Outcomes in Patients with Acute  
4 Respiratory Distress Syndrome Enrolled in a Randomized Clinical Trial of Helmet  
5 versus Facemask Noninvasive Ventilation. *Critical care medicine* 2018;46(7):1078.  
6  
7
- 8 16. Liu Q, Gao Y, Chen R, et al. Noninvasive ventilation with helmet versus control strategy  
9 in patients with acute respiratory failure: a systematic review and meta-analysis of  
10 controlled studies. *Critical Care* 2016;20(1)  
11  
12
- 13 17. Luo Y, Luo Y, Li Y, et al. Helmet CPAP versus Oxygen Therapy in Hypoxemic Acute  
14 Respiratory Failure: A Meta-Analysis of Randomized Controlled Trials, 2016.  
15  
16
- 17 18. Ferreyro BL, Angriman F, Munshi L, et al. Association of Noninvasive Oxygenation  
18 Strategies With All-Cause Mortality in Adults With Acute Hypoxemic Respiratory  
19 Failure: A Systematic Review and Meta-analysis. *Jama* 2020;324(1):57-67. doi:  
20 10.1001/jama.2020.9524  
21
- 22 19. Kyeremanteng K, Gagnon LP, Robidoux R, et al. Cost Analysis of Noninvasive Helmet  
23 Ventilation Compared with Use of Noninvasive Face Mask in ARDS. *Can Respir J*  
24 2018;2018:6518572. doi: 10.1155/2018/6518572 [published Online First: 2018/04/20]  
25  
26
- 27 20. Grieco DL, Menga LS, Cesarano M, et al. Effect of Helmet Noninvasive Ventilation vs  
28 High-Flow Nasal Oxygen on Days Free of Respiratory Support in Patients With  
29 COVID-19 and Moderate to Severe Hypoxemic Respiratory Failure: The HENIVOT  
30 Randomized Clinical Trial. *Jama* 2021 doi: 10.1001/jama.2021.4682  
31  
32
- 33 21. Bellani G, Laffey J, Pham T, et al. Epidemiology, Patterns of Care, and Mortality for  
34 Patients With Acute Respiratory Distress Syndrome in Intensive Care Units in 50  
35 Countries. *Jama* 2016;315(8):788.  
36  
37
- 38 22. Hasan SS, Capstick T, Ahmed R, et al. Mortality in COVID-19 patients with acute  
39 respiratory distress syndrome and corticosteroids use: a systematic review and meta-  
40 analysis. *Expert Rev Respir Med* 2020;14(11):1149-63. doi:  
41 10.1080/17476348.2020.1804365 [published Online First: 2020/08/01]  
42  
43
- 44 23. Centers for Disease Control and Prevention. Coronavirus Disease 2019 (COVID-19).  
45 2020 Interim Case Definition, Approved April 5, 2020.  
46 [https://wwwn.cdc.gov/nndss/conditions/coronavirus-disease-2019-covid-19/case-](https://wwwn.cdc.gov/nndss/conditions/coronavirus-disease-2019-covid-19/case-definition/2020/)  
47 [definition/2020/](https://wwwn.cdc.gov/nndss/conditions/coronavirus-disease-2019-covid-19/case-definition/2020/). Accessed on June 2, 2020.  
48  
49
- 50 24. Arabi Y, Al Aseri Z, Alaama T, et al. National Approach to Standardize and Improve  
51 Mechanical Ventilation. *Annals of thoracic medicine* 2019;14(2):101.  
52  
53
- 54 25. Alhazzani W, Al-Suwaidan F, Al Aseri Z, et al. The saudi critical care society clinical  
55 practice guidelines on the management of COVID-19 patients in the intensive care  
56 unit. *Saudi Critical Care Journal* 2020;4(2):27-44. doi: 10.4103/sccj.sccj\_15\_20  
57  
58
- 59 26. Alhazzani W, Evans L, Alshamsi F, et al. Surviving Sepsis Campaign Guidelines on the  
60 Management of Adults With Coronavirus Disease 2019 (COVID-19) in the ICU: First



- 1  
2  
3 Update. *Critical Care Medicine* 2021;49(3):e219-e34. doi:  
4 10.1097/ccm.0000000000004899  
5  
6 27. Alhazzani W, Møller MH, Arabi YM, et al. Surviving Sepsis Campaign: Guidelines on the  
7 Management of Critically Ill Adults with Coronavirus Disease 2019 (COVID-19).  
8 *Critical Care Medicine* 2020;48(6):e440-e69. doi: 10.1097/ccm.0000000000004363  
9  
10 28. Coronavirus disease (COVID-19) technical guidance: Patient management.  
11 [https://www.who.int/emergencies/diseases/novel-coronavirus-2019/technical-](https://www.who.int/emergencies/diseases/novel-coronavirus-2019/technical-guidance/patient-management)  
12 [guidance/patient-management](https://www.who.int/emergencies/diseases/novel-coronavirus-2019/technical-guidance/patient-management). Accessed 1 March 2021.  
13  
14 29. Knaus WA, Draper EA, Wagner DP, et al. APACHE II: a severity of disease classification  
15 system. *Crit Care Med* 1985;13(10):818-29. [published Online First: 1985/10/01]  
16  
17 30. Cook D, Lauzier F, Rocha MG, et al. Serious adverse events in academic critical care  
18 research. *CMAJ : Canadian Medical Association journal = journal de l'Association*  
19 *medicale canadienne* 2008;178(9):1181-84.  
20  
21  
22  
23  
24  
25  
26  
27  
28  
29  
30  
31  
32  
33  
34  
35  
36  
37  
38  
39  
40  
41  
42  
43  
44  
45  
46  
47  
48  
49  
50  
51  
52  
53  
54  
55  
56  
57  
58  
59  
60

## Acknowledgements

The authors would like to thank all the participating patients and their families, as well as the members of the Data Safety & Monitoring Board: Chair: Dr. Nicholas S. Hill (Professor of Medicine, Chief of Pulmonary, Critical Care and Sleep Division, Tufts Medical Center, Boston, Massachusetts, USA), DSM members: Dr. Stefano Nava (Professor of Respiratory Medicine University of Bologna, Chief of the Respiratory and Critical Care Sant' Orsola Hospital Bologna, Specialist in Respiratory Medicine and Intensive Care Medicine, University of Bologna, Italy), Dr. James Mojica (Vice Chief and Clinical Director of Pulmonary & Critical Care, Director, The Sleep Center at Spaulding, Massachusetts General Hospital, USA) and Dr. Michael Harhay (Assistant Professor of Epidemiology and Medicine-Pulmonary and Critical Care, Department of Biostatistics, Epidemiology and Informatics, University of Pennsylvania USA).

**Contributors** YA is the principal investigator and participated in the project concept, design, final approval, and manuscript preparation, review and submission. HT, SD, HD, SA, MH, HH, MM, OZ, EQ, WW, SQ, FH, JC, MS, AH, AM, AE, AB, ZA ZD, AK, RQ, AG, AT, KG, HG, AA, FB, HS, MO, YI, AF participated in the critical revision, final approval of the protocol and manuscript preparation, review and submission. All authors agree to be accountable for the accuracy and integrity of the work.

**Funding** The study is funded by King Abdullah International Medical Research Center (RC 20/306/R). The study sponsor does not have any role in the study design, collection, management, analysis, and interpretation of data as well as writing of the report.

**Competing interests** None declared

## Ethics approval

The study has been approved by the Institutional Review Board (IRB) of Ministry of National Guard Health Affairs (MNGHA) and the respective Institutional Review Boards of all the other centers.

**Patient consent for publication** Not required.

**Provenance and peer review** Not commissioned, externally peer reviewed.

**Table 1. Eligibility Criteria**

|                                |                                                                                                                                                                                                                                                                                                                                                                                                                                                                                                                                                                                                                                                                                                                                                                                                                                                                                                                                                                        |
|--------------------------------|------------------------------------------------------------------------------------------------------------------------------------------------------------------------------------------------------------------------------------------------------------------------------------------------------------------------------------------------------------------------------------------------------------------------------------------------------------------------------------------------------------------------------------------------------------------------------------------------------------------------------------------------------------------------------------------------------------------------------------------------------------------------------------------------------------------------------------------------------------------------------------------------------------------------------------------------------------------------|
| <b>Inclusion Criteria</b>      | <ol style="list-style-type: none"> <li>1. Suspected or confirmed COVID-19*</li> <li>2. Aged <math>\geq 14</math> years old. ICUs that use other age cut-off for adult patients will adhere to their local standard (16 or 18 years)</li> <li>3. Acute hypoxemic respiratory failure based on PaO<sub>2</sub>/FiO<sub>2</sub> ratio <math>&lt; 200</math> despite supplemental oxygen with a partial or non-rebreathing mask at a flow rate <math>&gt;10</math> L/min or above</li> <li>4. Intact airway protective gag reflex</li> <li>5. Able to follow instructions</li> </ol>                                                                                                                                                                                                                                                                                                                                                                                       |
| <b>Exclusion Criteria</b>      | <ol style="list-style-type: none"> <li>1. Prior intubation during this hospital admission</li> <li>2. Cardiopulmonary arrest</li> <li>3. Glasgow coma scale <math>&lt;12</math></li> <li>4. Tracheostomy</li> <li>5. Upper airway obstruction</li> <li>6. Active epistaxis</li> <li>7. Requirement for more than one vasopressor to maintain mean arterial pressure <math>&gt;65</math> mm Hg.</li> <li>8. Pregnancy</li> <li>9. Imminent intubation</li> <li>10. Patients with do-not-intubate orders (or equivalent)</li> <li>11. Enrolled in another trial for which co-enrolment is not approved including trials on mechanical ventilation</li> <li>12. Patients already treated with helmet</li> <li>13. Patients with chronic carbon dioxide retention (PaCO<sub>2</sub><math>&gt;45</math>)</li> <li>14. Previous enrolment in this trial</li> <li>15. The primary cause of respiratory failure is not heart failure as judged by the treating team</li> </ol> |
| <b>Eligible non-randomized</b> | <ol style="list-style-type: none"> <li>1. Patient or substitute decision-maker declines consent</li> <li>2. ICU physician or other treating clinician declines consent</li> </ol>                                                                                                                                                                                                                                                                                                                                                                                                                                                                                                                                                                                                                                                                                                                                                                                      |

\*A suspected/probable COVID-19 case is defined as: At least two of the following symptoms: fever (measured or subjective), chills, rigors, myalgia, headache, sore throat, new olfactory and taste disorder(s) **OR** at least one of the following symptoms: cough, shortness of breath, or difficulty breathing **OR** severe respiratory illness with at least one of the following: Clinical or radiographic evidence of pneumonia, **OR** ARDS **AND** no alternative more likely diagnosis. A confirmed COVID-19 case is defined as: Detection of SARS-CoV-2 RNA in a respiratory specimen using a molecular amplification detection test such as rt-PCR (<https://wwwn.cdc.gov/nndss/conditions/coronavirus-disease-2019-covid-19/case-definition/2020/>).

**Table 2.** Schedule of assessments in the trial

| <b>Task</b>                                | <b>Screening</b> | <b>Randomization</b> | <b>Baseline</b> | <b>Day 1-28</b> | <b>180-Day Follow up</b> |
|--------------------------------------------|------------------|----------------------|-----------------|-----------------|--------------------------|
| Assess eligibility to enter study          | X                |                      |                 |                 |                          |
| Assess ability to gain consent & follow-up | X                |                      |                 |                 |                          |
| Consent                                    | X                |                      |                 |                 |                          |
| Demographics and eligibility checklist     | X                | X                    | X               |                 |                          |
| Laboratory data                            |                  |                      | X               | X               |                          |
| Vital signs                                |                  |                      | X               | X               |                          |
| Vital status up to Day 28 in the ICU       |                  |                      |                 | X               | X                        |
| Vital and functional status                |                  |                      |                 |                 | X                        |
| Discharge date from ICU, from hospital     |                  |                      |                 | X               | X                        |
| Adverse events                             |                  |                      |                 | X               |                          |
| Protocol violations                        |                  |                      |                 | X               |                          |

For peer review only

**Table 3.** List of ongoing registered randomized controlled trials (RCTs) on helmet noninvasive ventilation

| <b>Trial</b>                                                                                               | <b>Registration</b> | <b>Interventions</b>                               | <b>Design</b>     | <b>Countries</b> | <b>N</b> |
|------------------------------------------------------------------------------------------------------------|---------------------|----------------------------------------------------|-------------------|------------------|----------|
| Helmet non-invasive ventilation for COVID-19 patients (Helmet-COVID)                                       | NCT04477668         | Helmet vs. usual care                              | Multicenter RCT   | Saudi Arabia     | 320      |
| Comparison of high-flow nasal oxygen, face-mask NIV and helmet NIV in COVID-19 ARDS patients (NIV COVID19) | NCT04715243         | High-flow nasal oxygen vs. helmet NIV vs. mask NIV | Multicenter RCT   | Oman             | 360      |
| Helmet CPAP vs. high-flow nasal oxygen in COVID-19 (COVID HELMET)                                          | NCT04395807         | High-flow nasal oxygen vs. helmet CPAP             | Single-center RCT | Sweden           | 120      |
| high-flow nasal oxygen vs. CPAP Helmet in COVID-19 pneumonia (COVIDNOCHE)                                  | NCT04381923         | High-flow nasal oxygen vs. helmet CPAP             | Single-center RCT | USA              | 200      |
| Early CPAP in COVID-19 patients with respiratory failure (EC-COVID-RCT)                                    | NCT04326075         | Early helmet CPAP vs. usual care                   | Single-center RCT | Italy            | 900      |

## Helmet-NIV Protocol

### Setup and preparation

- Use unheated, low-compliance, dual limb breathing circuit.
- Insert a bacterial/viral filter at the expiratory port of the ventilator.
- Carry out the required preoperational check.
- To avoid patient-ventilator asynchrony, explain the application and the procedure of the helmet to the patient.
- Insert the earplugs into patient ears.
- Use the under-arm pads to avoid strap pressure.

### Initial setup

- Can be used with a ventilator or NIV machines.
- Set up the ventilator on Pressure Support Ventilation (PSV).
- PSV 8-10 cm H<sub>2</sub>O pressure, positive end-expiratory pressure (PEEP) 10 cm H<sub>2</sub>O pressure, FiO<sub>2</sub> 100%.
- Flow rate >50 L/min, inspiratory rise time 50 msec, End Flow/Cycling off 50% of maximal inspiratory flow.

### Titration

- Increase PEEP by 2 cm H<sub>2</sub>O every 3 minutes to achieve SpO<sub>2</sub> ≥ 92% on FiO<sub>2</sub> ≤ 60%
- Higher PEEP than what is used on face mask NIV is allowed and tolerated.
- Increase PS by 2 cm every 3 minutes to achieve respiratory rate (RR) ≤ 25/min or clear patient comfort.
- The maximal allowed PS + PEEP is 30 cm H<sub>2</sub>O.
- Helmet interruptions should be avoided or kept at minimum at least for the first 48 hours.
- Titrate FiO<sub>2</sub> to ≤60% as soon as possible.

### Sedation

- Dexmedetomidine may be used to improve compliance with the helmet. Other intravenous sedatives such as benzodiazepines or intravenous narcotics should not be used.

### Weaning when clinical condition allows

- Titrate PS by 2 cm H<sub>2</sub>O every 3 hours if RR ≤ 25/min.
- Titrate PEEP by 2 cm H<sub>2</sub>O every 3 hours if SpO<sub>2</sub> >92% on <60% FiO<sub>2</sub>.
- If RR ≤25/min on PSV ≤8 cm and SpO<sub>2</sub> >92% on FiO<sub>2</sub> ≤50% and PEEP ≤8 cm H<sub>2</sub>O, the helmet can be discontinued and patient switched to high-flow nasal cannula, or oxygen supply at O<sub>2</sub> at 6L/min or higher.
- Helmet NIV could be resumed at any time if the respiratory rate was greater than 25 breaths/min and/or SpO<sub>2</sub> was lower than 92% on FiO<sub>2</sub> of ≥60%.

### Nursing Care

- Perform oral care/suction before helmet application.
- Nutrition can be provided through a straw. Place a nasogastric tube before helmet application if felt necessary by treating physician (not commonly needed).
- A suction Yankauer for suctioning and a straw for drinking can be introduced through the patient port without removing the helmet.
- Intravenous sedation (Dexmedetomidine or others) can be used at the discretion of the treating physician to assure patient comfort.

**Equipment required**

- Mechanical ventilator (BP 840, PB 980, Servo-I, Drager V 500, Astral and V680)
- Unheated double lumen circuit
- Bacterial/viral filter
- Subsalve helmet or equivalent
- Under arm pads
- Ear plugs

**General recommendations to consider intubation for patients on NIV (assessed within 4 hours and at frequent intervals throughout NIV treatment):**

- Neurologic deterioration (not attributed to sedation)
- Persistent or worsening respiratory failure of NIV:
  - o oxygen saturation <88%
  - o respiratory rate >36/min
  - o P/F ratio <100
  - o a persistent requirement of FiO<sub>2</sub> ≥70%
- Intolerance of face mask or helmet
- Airway bleeding
- Copious respiratory secretions
- Respiratory acidosis with pH <7.25
- Hemodynamic instability
- Significant radiologic worsening

**Humidification**

Appropriate level of humidification can be achieved via bubble humidifier with external oxygen flow of 5 L/min entrained into the ventilator circuit proximal to the patient helmet.



STANDARD PROTOCOL ITEMS: RECOMMENDATIONS FOR INTERVENTIONAL TRIALS

SPIRIT 2013 Checklist: Recommended items to address in a clinical trial protocol and related documents\*

| Section/item                      | Item No | Description                                                                                                                                                                                                                                                                              | Addressed on page number |
|-----------------------------------|---------|------------------------------------------------------------------------------------------------------------------------------------------------------------------------------------------------------------------------------------------------------------------------------------------|--------------------------|
| <b>Administrative information</b> |         |                                                                                                                                                                                                                                                                                          |                          |
| Title                             | 1       | Descriptive title identifying the study design, population, interventions, and, if applicable, trial acronym                                                                                                                                                                             | <u>1</u>                 |
| Trial registration                | 2a      | Trial identifier and registry name. If not yet registered, name of intended registry                                                                                                                                                                                                     | <u>6</u>                 |
|                                   | 2b      | All items from the World Health Organization Trial Registration Data Set                                                                                                                                                                                                                 | <u>6</u>                 |
| Protocol version                  | 3       | Date and version identifier                                                                                                                                                                                                                                                              | <u>6</u>                 |
| Funding                           | 4       | Sources and types of financial, material, and other support                                                                                                                                                                                                                              | <u>24</u>                |
| Roles and responsibilities        | 5a      | Names, affiliations, and roles of protocol contributors                                                                                                                                                                                                                                  | <u>24</u>                |
|                                   | 5b      | Name and contact information for the trial sponsor                                                                                                                                                                                                                                       | <u>24</u>                |
|                                   | 5c      | Role of study sponsor and funders, if any, in study design; collection, management, analysis, and interpretation of data; writing of the report; and the decision to submit the report for publication, including whether they will have ultimate authority over any of these activities | <u>24</u>                |
|                                   | 5d      | Composition, roles, and responsibilities of the coordinating centre, steering committee, endpoint adjudication committee, data management team, and other individuals or groups overseeing the trial, if applicable (see Item 21a for data monitoring committee)                         | <u>24</u>                |



1 **Introduction**

|    |                                                           |     |                                                                                                                                                                                                                                                                                                                                                                                |
|----|-----------------------------------------------------------|-----|--------------------------------------------------------------------------------------------------------------------------------------------------------------------------------------------------------------------------------------------------------------------------------------------------------------------------------------------------------------------------------|
| 2  |                                                           |     |                                                                                                                                                                                                                                                                                                                                                                                |
| 3  | Background and                                            | 6a  | Description of research question and justification for undertaking the trial, including summary of relevant studies (published and unpublished) examining benefits and harms for each intervention                                                                                                                                                                             |
| 4  | rationale                                                 |     | 8-12                                                                                                                                                                                                                                                                                                                                                                           |
| 5  |                                                           |     |                                                                                                                                                                                                                                                                                                                                                                                |
| 6  |                                                           | 6b  | Explanation for choice of comparators                                                                                                                                                                                                                                                                                                                                          |
| 7  |                                                           |     | 8-12                                                                                                                                                                                                                                                                                                                                                                           |
| 8  | Objectives                                                | 7   | Specific objectives or hypotheses                                                                                                                                                                                                                                                                                                                                              |
| 9  |                                                           |     | 8-12                                                                                                                                                                                                                                                                                                                                                                           |
| 10 | Trial design                                              | 8   | Description of trial design including type of trial (eg, parallel group, crossover, factorial, single group), allocation ratio, and framework (eg, superiority, equivalence, noninferiority, exploratory)                                                                                                                                                                      |
| 11 |                                                           |     | 8-12                                                                                                                                                                                                                                                                                                                                                                           |
| 12 |                                                           |     |                                                                                                                                                                                                                                                                                                                                                                                |
| 13 |                                                           |     |                                                                                                                                                                                                                                                                                                                                                                                |
| 14 | <b>Methods: Participants, interventions, and outcomes</b> |     |                                                                                                                                                                                                                                                                                                                                                                                |
| 15 |                                                           |     |                                                                                                                                                                                                                                                                                                                                                                                |
| 16 | Study setting                                             | 9   | Description of study settings (eg, community clinic, academic hospital) and list of countries where data will be collected. Reference to where list of study sites can be obtained                                                                                                                                                                                             |
| 17 |                                                           |     | 8-12                                                                                                                                                                                                                                                                                                                                                                           |
| 18 |                                                           |     |                                                                                                                                                                                                                                                                                                                                                                                |
| 19 | Eligibility criteria                                      | 10  | Inclusion and exclusion criteria for participants. If applicable, eligibility criteria for study centres and individuals who will perform the interventions (eg, surgeons, psychotherapists)                                                                                                                                                                                   |
| 20 |                                                           |     | 8-12                                                                                                                                                                                                                                                                                                                                                                           |
| 21 |                                                           |     |                                                                                                                                                                                                                                                                                                                                                                                |
| 22 | Interventions                                             | 11a | Interventions for each group with sufficient detail to allow replication, including how and when they will be administered                                                                                                                                                                                                                                                     |
| 23 |                                                           |     | 8-12                                                                                                                                                                                                                                                                                                                                                                           |
| 24 |                                                           |     |                                                                                                                                                                                                                                                                                                                                                                                |
| 25 |                                                           | 11b | Criteria for discontinuing or modifying allocated interventions for a given trial participant (eg, drug dose change in response to harms, participant request, or improving/worsening disease)                                                                                                                                                                                 |
| 26 |                                                           |     | 13                                                                                                                                                                                                                                                                                                                                                                             |
| 27 |                                                           |     |                                                                                                                                                                                                                                                                                                                                                                                |
| 28 |                                                           | 11c | Strategies to improve adherence to intervention protocols, and any procedures for monitoring adherence (eg, drug tablet return, laboratory tests)                                                                                                                                                                                                                              |
| 29 |                                                           |     | 14, 16                                                                                                                                                                                                                                                                                                                                                                         |
| 30 |                                                           |     |                                                                                                                                                                                                                                                                                                                                                                                |
| 31 |                                                           | 11d | Relevant concomitant care and interventions that are permitted or prohibited during the trial                                                                                                                                                                                                                                                                                  |
| 32 |                                                           |     | 13-14                                                                                                                                                                                                                                                                                                                                                                          |
| 33 |                                                           |     |                                                                                                                                                                                                                                                                                                                                                                                |
| 34 | Outcomes                                                  | 12  | Primary, secondary, and other outcomes, including the specific measurement variable (eg, systolic blood pressure), analysis metric (eg, change from baseline, final value, time to event), method of aggregation (eg, median, proportion), and time point for each outcome. Explanation of the clinical relevance of chosen efficacy and harm outcomes is strongly recommended |
| 35 |                                                           |     | 15                                                                                                                                                                                                                                                                                                                                                                             |
| 36 |                                                           |     |                                                                                                                                                                                                                                                                                                                                                                                |
| 37 | Participant timeline                                      | 13  | Time schedule of enrolment, interventions (including any run-ins and washouts), assessments, and visits for participants. A schematic diagram is highly recommended (see Figure)                                                                                                                                                                                               |
| 38 |                                                           |     | 14                                                                                                                                                                                                                                                                                                                                                                             |
| 39 |                                                           |     |                                                                                                                                                                                                                                                                                                                                                                                |
| 40 |                                                           |     |                                                                                                                                                                                                                                                                                                                                                                                |
| 41 |                                                           |     |                                                                                                                                                                                                                                                                                                                                                                                |
| 42 |                                                           |     |                                                                                                                                                                                                                                                                                                                                                                                |
| 43 |                                                           |     |                                                                                                                                                                                                                                                                                                                                                                                |
| 44 |                                                           |     |                                                                                                                                                                                                                                                                                                                                                                                |
| 45 |                                                           |     |                                                                                                                                                                                                                                                                                                                                                                                |
| 46 |                                                           |     |                                                                                                                                                                                                                                                                                                                                                                                |

|    |                                                                     |     |                                                                                                                                                                                                                                                                                                                                                                                                              |              |
|----|---------------------------------------------------------------------|-----|--------------------------------------------------------------------------------------------------------------------------------------------------------------------------------------------------------------------------------------------------------------------------------------------------------------------------------------------------------------------------------------------------------------|--------------|
| 1  | Sample size                                                         | 14  | Estimated number of participants needed to achieve study objectives and how it was determined, including clinical and statistical assumptions supporting any sample size calculations                                                                                                                                                                                                                        | <u>11</u>    |
| 2  |                                                                     |     |                                                                                                                                                                                                                                                                                                                                                                                                              |              |
| 3  |                                                                     |     |                                                                                                                                                                                                                                                                                                                                                                                                              |              |
| 4  | Recruitment                                                         | 15  | Strategies for achieving adequate participant enrolment to reach target sample size                                                                                                                                                                                                                                                                                                                          | <u>16-17</u> |
| 5  |                                                                     |     |                                                                                                                                                                                                                                                                                                                                                                                                              |              |
| 6  |                                                                     |     |                                                                                                                                                                                                                                                                                                                                                                                                              |              |
| 7  | <b>Methods: Assignment of interventions (for controlled trials)</b> |     |                                                                                                                                                                                                                                                                                                                                                                                                              |              |
| 8  | Allocation:                                                         |     |                                                                                                                                                                                                                                                                                                                                                                                                              |              |
| 9  |                                                                     |     |                                                                                                                                                                                                                                                                                                                                                                                                              |              |
| 10 | Sequence                                                            | 16a | Method of generating the allocation sequence (eg, computer-generated random numbers), and list of any factors for stratification. To reduce predictability of a random sequence, details of any planned restriction (eg, blocking) should be provided in a separate document that is unavailable to those who enrol participants or assign interventions                                                     | <u>11</u>    |
| 11 | generation                                                          |     |                                                                                                                                                                                                                                                                                                                                                                                                              |              |
| 12 |                                                                     |     |                                                                                                                                                                                                                                                                                                                                                                                                              |              |
| 13 |                                                                     |     |                                                                                                                                                                                                                                                                                                                                                                                                              |              |
| 14 |                                                                     |     |                                                                                                                                                                                                                                                                                                                                                                                                              |              |
| 15 |                                                                     |     |                                                                                                                                                                                                                                                                                                                                                                                                              |              |
| 16 | Allocation                                                          | 16b | Mechanism of implementing the allocation sequence (eg, central telephone; sequentially numbered, opaque, sealed envelopes), describing any steps to conceal the sequence until interventions are assigned                                                                                                                                                                                                    | <u>11</u>    |
| 17 | concealment                                                         |     |                                                                                                                                                                                                                                                                                                                                                                                                              |              |
| 18 | mechanism                                                           |     |                                                                                                                                                                                                                                                                                                                                                                                                              |              |
| 19 |                                                                     |     |                                                                                                                                                                                                                                                                                                                                                                                                              |              |
| 20 |                                                                     |     |                                                                                                                                                                                                                                                                                                                                                                                                              |              |
| 21 | Implementation                                                      | 16c | Who will generate the allocation sequence, who will enrol participants, and who will assign participants to interventions                                                                                                                                                                                                                                                                                    | <u>11</u>    |
| 22 |                                                                     |     |                                                                                                                                                                                                                                                                                                                                                                                                              |              |
| 23 |                                                                     |     |                                                                                                                                                                                                                                                                                                                                                                                                              |              |
| 24 | Blinding (masking)                                                  | 17a | Who will be blinded after assignment to interventions (eg, trial participants, care providers, outcome assessors, data analysts), and how                                                                                                                                                                                                                                                                    | <u>14</u>    |
| 25 |                                                                     |     |                                                                                                                                                                                                                                                                                                                                                                                                              |              |
| 26 |                                                                     |     |                                                                                                                                                                                                                                                                                                                                                                                                              |              |
| 27 |                                                                     | 17b | If blinded, circumstances under which unblinding is permissible, and procedure for revealing a participant's allocated intervention during the trial                                                                                                                                                                                                                                                         | <u>14</u>    |
| 28 |                                                                     |     |                                                                                                                                                                                                                                                                                                                                                                                                              |              |
| 29 |                                                                     |     |                                                                                                                                                                                                                                                                                                                                                                                                              |              |
| 30 |                                                                     |     |                                                                                                                                                                                                                                                                                                                                                                                                              |              |
| 31 | <b>Methods: Data collection, management, and analysis</b>           |     |                                                                                                                                                                                                                                                                                                                                                                                                              |              |
| 32 |                                                                     |     |                                                                                                                                                                                                                                                                                                                                                                                                              |              |
| 33 | Data collection                                                     | 18a | Plans for assessment and collection of outcome, baseline, and other trial data, including any related processes to promote data quality (eg, duplicate measurements, training of assessors) and a description of study instruments (eg, questionnaires, laboratory tests) along with their reliability and validity, if known. Reference to where data collection forms can be found, if not in the protocol | <u>14-15</u> |
| 34 | methods                                                             |     |                                                                                                                                                                                                                                                                                                                                                                                                              |              |
| 35 |                                                                     |     |                                                                                                                                                                                                                                                                                                                                                                                                              |              |
| 36 |                                                                     |     |                                                                                                                                                                                                                                                                                                                                                                                                              |              |
| 37 |                                                                     |     |                                                                                                                                                                                                                                                                                                                                                                                                              |              |
| 38 |                                                                     |     |                                                                                                                                                                                                                                                                                                                                                                                                              |              |
| 39 |                                                                     | 18b | Plans to promote participant retention and complete follow-up, including list of any outcome data to be collected for participants who discontinue or deviate from intervention protocols                                                                                                                                                                                                                    | <u>14-15</u> |
| 40 |                                                                     |     |                                                                                                                                                                                                                                                                                                                                                                                                              |              |
| 41 |                                                                     |     |                                                                                                                                                                                                                                                                                                                                                                                                              |              |
| 42 |                                                                     |     |                                                                                                                                                                                                                                                                                                                                                                                                              |              |
| 43 |                                                                     |     |                                                                                                                                                                                                                                                                                                                                                                                                              |              |
| 44 |                                                                     |     |                                                                                                                                                                                                                                                                                                                                                                                                              |              |
| 45 |                                                                     |     |                                                                                                                                                                                                                                                                                                                                                                                                              |              |
| 46 |                                                                     |     |                                                                                                                                                                                                                                                                                                                                                                                                              |              |

|    |                                 |     |                                                                                                                                                                                                                                                                                                                                       |                       |
|----|---------------------------------|-----|---------------------------------------------------------------------------------------------------------------------------------------------------------------------------------------------------------------------------------------------------------------------------------------------------------------------------------------|-----------------------|
| 1  | Data management                 | 19  | Plans for data entry, coding, security, and storage, including any related processes to promote data quality (eg, double data entry; range checks for data values). Reference to where details of data management procedures can be found, if not in the protocol                                                                     | <u>14-17</u>          |
| 2  |                                 |     |                                                                                                                                                                                                                                                                                                                                       |                       |
| 3  |                                 |     |                                                                                                                                                                                                                                                                                                                                       |                       |
| 4  |                                 |     |                                                                                                                                                                                                                                                                                                                                       |                       |
| 5  | Statistical methods             | 20a | Statistical methods for analysing primary and secondary outcomes. Reference to where other details of the statistical analysis plan can be found, if not in the protocol                                                                                                                                                              | <u>15-16</u>          |
| 6  |                                 |     |                                                                                                                                                                                                                                                                                                                                       |                       |
| 7  |                                 |     |                                                                                                                                                                                                                                                                                                                                       |                       |
| 8  |                                 | 20b | Methods for any additional analyses (eg, subgroup and adjusted analyses)                                                                                                                                                                                                                                                              | <u>15-16</u>          |
| 9  |                                 |     |                                                                                                                                                                                                                                                                                                                                       |                       |
| 10 |                                 | 20c | Definition of analysis population relating to protocol non-adherence (eg, as randomised analysis), and any statistical methods to handle missing data (eg, multiple imputation)                                                                                                                                                       | <u>15-16</u>          |
| 11 |                                 |     |                                                                                                                                                                                                                                                                                                                                       |                       |
| 12 |                                 |     |                                                                                                                                                                                                                                                                                                                                       |                       |
| 13 |                                 |     |                                                                                                                                                                                                                                                                                                                                       |                       |
| 14 | <b>Methods: Monitoring</b>      |     |                                                                                                                                                                                                                                                                                                                                       |                       |
| 15 |                                 |     |                                                                                                                                                                                                                                                                                                                                       |                       |
| 16 | Data monitoring                 | 21a | Composition of data monitoring committee (DMC); summary of its role and reporting structure; statement of whether it is independent from the sponsor and competing interests; and reference to where further details about its charter can be found, if not in the protocol. Alternatively, an explanation of why a DMC is not needed | <u>16-17</u>          |
| 17 |                                 |     |                                                                                                                                                                                                                                                                                                                                       |                       |
| 18 |                                 | 21b | Description of any interim analyses and stopping guidelines, including who will have access to these interim results and make the final decision to terminate the trial                                                                                                                                                               | <u>16-17</u>          |
| 19 |                                 |     |                                                                                                                                                                                                                                                                                                                                       |                       |
| 20 |                                 |     |                                                                                                                                                                                                                                                                                                                                       |                       |
| 21 |                                 |     |                                                                                                                                                                                                                                                                                                                                       |                       |
| 22 |                                 |     |                                                                                                                                                                                                                                                                                                                                       |                       |
| 23 |                                 |     |                                                                                                                                                                                                                                                                                                                                       |                       |
| 24 |                                 |     |                                                                                                                                                                                                                                                                                                                                       |                       |
| 25 | Harms                           | 22  | Plans for collecting, assessing, reporting, and managing solicited and spontaneously reported adverse events and other unintended effects of trial interventions or trial conduct                                                                                                                                                     | <u>16-17</u>          |
| 26 |                                 |     |                                                                                                                                                                                                                                                                                                                                       |                       |
| 27 |                                 |     |                                                                                                                                                                                                                                                                                                                                       |                       |
| 28 | Auditing                        | 23  | Frequency and procedures for auditing trial conduct, if any, and whether the process will be independent from investigators and the sponsor                                                                                                                                                                                           | <u>Not applicable</u> |
| 29 |                                 |     |                                                                                                                                                                                                                                                                                                                                       |                       |
| 30 |                                 |     |                                                                                                                                                                                                                                                                                                                                       |                       |
| 31 |                                 |     |                                                                                                                                                                                                                                                                                                                                       |                       |
| 32 | <b>Ethics and dissemination</b> |     |                                                                                                                                                                                                                                                                                                                                       |                       |
| 33 |                                 |     |                                                                                                                                                                                                                                                                                                                                       |                       |
| 34 | Research ethics approval        | 24  | Plans for seeking research ethics committee/institutional review board (REC/IRB) approval                                                                                                                                                                                                                                             | <u>17</u>             |
| 35 |                                 |     |                                                                                                                                                                                                                                                                                                                                       |                       |
| 36 |                                 |     |                                                                                                                                                                                                                                                                                                                                       |                       |
| 37 | Protocol amendments             | 25  | Plans for communicating important protocol modifications (eg, changes to eligibility criteria, outcomes, analyses) to relevant parties (eg, investigators, REC/IRBs, trial participants, trial registries, journals, regulators)                                                                                                      | <u>17</u>             |
| 38 |                                 |     |                                                                                                                                                                                                                                                                                                                                       |                       |
| 39 |                                 |     |                                                                                                                                                                                                                                                                                                                                       |                       |
| 40 |                                 |     |                                                                                                                                                                                                                                                                                                                                       |                       |
| 41 |                                 |     |                                                                                                                                                                                                                                                                                                                                       |                       |
| 42 |                                 |     |                                                                                                                                                                                                                                                                                                                                       |                       |
| 43 |                                 |     |                                                                                                                                                                                                                                                                                                                                       |                       |
| 44 |                                 |     |                                                                                                                                                                                                                                                                                                                                       |                       |
| 45 |                                 |     |                                                                                                                                                                                                                                                                                                                                       |                       |
| 46 |                                 |     |                                                                                                                                                                                                                                                                                                                                       |                       |

|    |                               |     |                                                                                                                                                                                                                                                                                     |                                                                    |
|----|-------------------------------|-----|-------------------------------------------------------------------------------------------------------------------------------------------------------------------------------------------------------------------------------------------------------------------------------------|--------------------------------------------------------------------|
| 1  | Consent or assent             | 26a | Who will obtain informed consent or assent from potential trial participants or authorised surrogates, and how (see Item 32)                                                                                                                                                        | 11                                                                 |
| 2  |                               |     |                                                                                                                                                                                                                                                                                     |                                                                    |
| 3  |                               |     |                                                                                                                                                                                                                                                                                     |                                                                    |
| 4  |                               | 26b | Additional consent provisions for collection and use of participant data and biological specimens in ancillary studies, if applicable                                                                                                                                               | Not applicable, no samples collected                               |
| 5  |                               |     |                                                                                                                                                                                                                                                                                     |                                                                    |
| 6  |                               |     |                                                                                                                                                                                                                                                                                     |                                                                    |
| 7  | Confidentiality               | 27  | How personal information about potential and enrolled participants will be collected, shared, and maintained in order to protect confidentiality before, during, and after the trial                                                                                                | 16-17                                                              |
| 8  |                               |     |                                                                                                                                                                                                                                                                                     |                                                                    |
| 9  |                               |     |                                                                                                                                                                                                                                                                                     |                                                                    |
| 10 | Declaration of interests      | 28  | Financial and other competing interests for principal investigators for the overall trial and each study site                                                                                                                                                                       | 22                                                                 |
| 11 |                               |     |                                                                                                                                                                                                                                                                                     |                                                                    |
| 12 |                               |     |                                                                                                                                                                                                                                                                                     |                                                                    |
| 13 | Access to data                | 29  | Statement of who will have access to the final trial dataset, and disclosure of contractual agreements that limit such access for investigators                                                                                                                                     | 22                                                                 |
| 14 |                               |     |                                                                                                                                                                                                                                                                                     |                                                                    |
| 15 |                               |     |                                                                                                                                                                                                                                                                                     |                                                                    |
| 16 | Ancillary and post-trial care | 30  | Provisions, if any, for ancillary and post-trial care, and for compensation to those who suffer harm from trial participation                                                                                                                                                       | Not applicable                                                     |
| 17 |                               |     |                                                                                                                                                                                                                                                                                     |                                                                    |
| 18 |                               |     |                                                                                                                                                                                                                                                                                     |                                                                    |
| 19 |                               |     |                                                                                                                                                                                                                                                                                     |                                                                    |
| 20 | Dissemination policy          | 31a | Plans for investigators and sponsor to communicate trial results to participants, healthcare professionals, the public, and other relevant groups (eg, via publication, reporting in results databases, or other data sharing arrangements), including any publication restrictions | 11                                                                 |
| 21 |                               |     |                                                                                                                                                                                                                                                                                     |                                                                    |
| 22 |                               |     |                                                                                                                                                                                                                                                                                     |                                                                    |
| 23 |                               |     |                                                                                                                                                                                                                                                                                     | Not applicable; the protocol manuscript was written by the authors |
| 24 |                               | 31b | Authorship eligibility guidelines and any intended use of professional writers                                                                                                                                                                                                      |                                                                    |
| 25 |                               |     |                                                                                                                                                                                                                                                                                     |                                                                    |
| 26 |                               | 31c | Plans, if any, for granting public access to the full protocol, participant-level dataset, and statistical code                                                                                                                                                                     | 11                                                                 |
| 27 |                               |     |                                                                                                                                                                                                                                                                                     |                                                                    |
| 28 |                               |     |                                                                                                                                                                                                                                                                                     |                                                                    |
| 29 | <b>Appendices</b>             |     |                                                                                                                                                                                                                                                                                     |                                                                    |
| 30 |                               |     |                                                                                                                                                                                                                                                                                     |                                                                    |
| 31 | Informed consent materials    | 32  | Model consent form and other related documentation given to participants and authorised surrogates                                                                                                                                                                                  | 11                                                                 |
| 32 |                               |     |                                                                                                                                                                                                                                                                                     |                                                                    |
| 33 |                               |     |                                                                                                                                                                                                                                                                                     | Not applicable, no samples collected                               |
| 34 | Biological specimens          | 33  | Plans for collection, laboratory evaluation, and storage of biological specimens for genetic or molecular analysis in the current trial and for future use in ancillary studies, if applicable                                                                                      |                                                                    |
| 35 |                               |     |                                                                                                                                                                                                                                                                                     |                                                                    |
| 36 |                               |     |                                                                                                                                                                                                                                                                                     |                                                                    |

\*It is strongly recommended that this checklist be read in conjunction with the SPIRIT 2013 Explanation & Elaboration for important clarification on the items. Amendments to the protocol should be tracked and dated. The SPIRIT checklist is copyrighted by the SPIRIT Group under the Creative Commons [“Attribution-NonCommercial-NoDerivs 3.0 Unported”](https://creativecommons.org/licenses/by-nc-nd/3.0/) license.
